# Supplementary material for: Paddlewheel 1,2,4-diazaphospholide dibismuthanes with very short bismuth–bismuth single bonds
Source: Royal Society of Chemistry journal article supplement (doi:10.1039/c5cc07064c), 2015-01-01
Supplement: c5cc07064c1.pdf [file c5cc07064c1.pdf]

Electronic Supplementary Information (ESI)

# **Paddlewheel 1,2,4-Diazaphospholide Dibismuthanes with Very Short Bismuth– Bismuth Single Bonds**

Minggang Zhao,<sup>a</sup> Lixia Wang,<sup>a</sup> Pangpang Li,<sup>a</sup> Xiang Zhang,<sup>a</sup> Ying Yang,<sup>b</sup> and Wenjun Zheng<sup>a,c,\*</sup>

*<sup>a</sup>Institute of Organic Chemistry & College of Chemical and Materials Science, Shanxi Normal University,  
Gongyuan Street 1, Linfen, Shanxi Province 041004, China*

*<sup>b</sup>School of Chemistry and Chemical Engineering, Central South University, Lushannan Road 932,  
Changsha, Hunan Province 410083, China*

*<sup>c</sup>Key Laboratory of Magnetic Molecules and Magnetic Information Material, Ministry of Education,  
Gongyuan Street 1, Linfen, Shanxi Province 041004, China*

Email: [wjzheng@sxnu.edu.cn](mailto:wjzheng@sxnu.edu.cn), [wjzheng\\_sxnu@qq.com](mailto:wjzheng_sxnu@qq.com)

## **Table of the Content**

- 1. Synthetic Procedures and Analytical Data for 2, 4, 5, and 6**
- 2.  $^1\text{H}$ ,  $^{31}\text{P}\{^1\text{H}\}$ ,  $^{13}\text{C}\{^1\text{H}\}$  NMR data for 2, 4, 5, and 6**
- 3. Crystal structural analysis data for 4, 5, and 6**
  - 3.1 Crystal structural analysis data for 4**
  - 3.2 Crystal structural analysis data for 5**
  - 3.3 Crystal structural analysis data for 6**
- 4. Theoretically computed data of 4, 5, and 6**
- 5. References**

## General Information

All manipulations were carried out in a nitrogen atmosphere under anaerobic conditions using standard Schlenk, vacuum line and glove box techniques. The solvents were thoroughly dried, deoxygenated and distilled in a nitrogen atmosphere prior to use. THF- $d_8$  and  $C_6D_6$  were dried with metallic potassium before use. The  $^1H$  NMR,  $^{13}C\{^1H\}$  NMR and  $^{31}P\{^1H\}$  NMR spectra were recorded with a Bruker DRX-600 spectrometer. IR measurements were carried out on a NICOLET 360 FT-IR spectrometer from Nujol mulls prepared in a dry box. Elemental analysis was performed on an Elementar vario MACRO cube (Germany). Melting points were measured in sealed argon-filled capillaries without temperature correction with an apparatus XT4-100A (Electronic and Optical Instruments, Beijing).  $BiCl_3$  were purchased from Aldrich and used as received.  $K[3,5-tBu_2dp]$ ,  $K[3,5-iPr_2dp]$ , and  $K[3,5-Ph_2dp]$  were prepared according to the literature.<sup>[1,2]</sup>

### 1. Synthetic Procedures, Spectral Data, and Analytical Data for **2**, **4**, **5**, and **6**

**Preparation of  $K[3,5-iPr_2dp]$  (**2**):** To a mixture of 1*H*-3,5-di-isopropyl-1,2,4-diazaphosphole ( $H[3,5-iPr_2dp]$ ) (0.655 g, 3.84 mmol)<sup>[1]</sup> and KH (0.201 g, 5.0 mmol) was added THF (20 mL) via syringe at room temperature. After the evolution of gas ceased the solution was filtered through Celite and the volatile components were removed in high vacuum (0.01 mmHg) to yield **2** as off-white pure solids (0.59 g, 73.7%). M.p. > 250°C, decomp..  $^1H$  NMR (600 MHz, DMSO- $d_6$ , 23°C):  $\delta$  = 3.04–2.99 (m, 2 H, *CH* for *iPr*), 1.20–1.19 (d,  $^1J_{H-H}$  = 7.2 Hz, 12 H, *CH*<sub>3</sub> for *iPr*) ppm;  $^{13}C\{^1H\}$  NMR (150 MHz, DMSO- $d_6$ , 23°C):  $\delta$  = 185.55, 185.23 (d,  $^1J_{C-P}$  = 48.0 Hz, PCN), 32.20, 32.05 (d,  $^2J_{C-P}$  = 22.5 Hz, *CH*), 26.55, 26.41 (d,  $^3J_{C-P}$  = 21.0 Hz, *CH*<sub>3</sub>) ppm;  $^{31}P\{^1H\}$  NMR (243 MHz, DMSO- $d_6$ , 23°C):  $\delta$  = 46.27 (s) ppm. IR (KBr, Nujol mull,  $cm^{-1}$ ): 2960(s), 2923(s), 2854(m), 1459(w), 1413(w), 1376(w), 1261(s), 1093(s), 1020(s), 863(w), 800(s), 665(w); Anal. calcd for  $C_8H_{14}KN_2P$ : C 46.13, H 6.78, N 13.45; Found: C 45.98, H 6.49, N 13.17.

**Preparation of  $\{\eta^1, \eta^1-3,5-tBu_2dp\}_2(Bi-Bi)\{\eta^1, \eta^1-3,5-tBu_2dp\}_2$  (**4**):** To a mixture of  $BiCl_3$  (0.315 g, 1.0 mmol) and  $K[3,5-tBu_2dp]$ <sup>[1]</sup> (**1**, 0.709 g, 3.0 mmol) was added 30 mL tetrahydrofuran (THF) via syringe. After the mixture was stirred for 48 hours the volatile components were removed under the reduced pressure. The resultant residue was extracted by toluene (4 × 10 mL) and the orange-red solution was filtered through Celite. The filtrate was concentrated under the reduced pressure to about 25 mL to give **4** as orange-red crystals at room temperature. The mother liquid was further concentrated to afford another portion of **4** and a group of colorless free ligand  $H[3,5-tBu_2dp]$  (0.095 g, 15.9% ) at –20°C. The total yield of **4** is 0.307 g (50.8%). M.p: > 210°C, turn red, decomp..  $^1H$  NMR (600 MHz, THF- $d_8$ , 23°C):  $\delta$  = 1.38, 1.25 (2s, 72 H, –*CH*<sub>3</sub>) ppm;  $^{13}C\{^1H\}$  NMR (150 MHz, THF- $d_8$ , 23°C):  $\delta$  = 199.34 (d,  $^1J_{C-P}$  = 60.0 Hz, PCN), 186.54 (d,  $^1J_{C-P}$  = 55.5 Hz, PCN), 32.88, 32.77 (2s, *CCH*<sub>3</sub>), 30.94–30.06 (2s, overlapped, *CH*<sub>3</sub>);  $^{31}P\{^1H\}$  NMR (243 MHz, THF- $d_8$ , 23°C): 79.11(s);  $^1H$  NMR (600 MHz,  $C_6D_6$ , 23°C):  $\delta$  = 1.28 (s, 72 H, –*CH*<sub>3</sub>) ppm;  $^{13}C\{^1H\}$  NMR (150 MHz,  $C_6D_6$ , 23°C):  $\delta$  = 201.40 (d,  $^1J_{C-P}$  = 58.5 Hz, PCN), 34.84 (d,  $^2J_{C-P}$  = 72.0 Hz, *CCH*<sub>3</sub>), 33.22 (d,  $^3J_{C-P}$  = 36.0 Hz, *CH*<sub>3</sub>);  $^{31}P\{^1H\}$  NMR (243 MHz,  $C_6D_6$ , 23°C): 80.20(s); IR (KBr, Nujol mull,  $cm^{-1}$ ): 2923(s), 2854(s), 1619(w), 1461(m), 1376(w), 1261(s), 1093(s), 1020(s), 800(s), 680(w); Anal. calcd for  $C_{40}H_{72}Bi_2P_4N_8$ : C 39.81, H 6.01, N 9.28; Found: C 38.99, H 5.81, N 8.97.

**Preparation of  $\{\eta^1, \eta^1\text{-}3,5\text{-}i\text{Pr}_2\text{dp}\}_2(\text{Bi-Bi})\{\eta^1, \eta^1\text{-}3,5\text{-}i\text{Pr}_2\text{dp}\}_2$  (**5 $\alpha$** , **5 $\beta$** ):** To a mixture of  $\text{BiCl}_3$  (0.297 g, 0.942 mmol) and **2** (0.59 g, 2.83 mmol) was added THF (20 mL) via syringe. After the mixture was stirred for 48 hours the volatile components were removed under the reduced pressure. The resultant residue was extracted by toluene ( $3 \times 10$  mL). The orange-red solution was filtered through Celite and the filtrate was concentrated to about 15 mL to give **5** as orange-red crystals at  $-15^\circ\text{C}$ . The mother liquor was further concentrated to afford another portion of **5** and small amount of colorless crystals  $\text{H}[3,5\text{-}i\text{Pr}_2\text{dp}]$  at  $-30^\circ\text{C}$ . The total yield of **5** was 0.238 g (46.1%). Mp:  $218\text{--}220^\circ\text{C}$ .  $^1\text{H}$  NMR (600 MHz,  $\text{C}_6\text{D}_6$ ,  $23^\circ\text{C}$ ):  $\delta = 2.98\text{--}2.95$  (m, slightly overlapped,  $^2J_{\text{P-H}} = 6.6$  Hz, 8 H, CH), 1.311 (d,  $^3J_{\text{P-H}} = 7.2$  Hz, 48 H,  $\text{CH}_3$ ) ppm;  $^{13}\text{C}\{^1\text{H}\}$  NMR (150 MHz,  $\text{C}_6\text{D}_6$ ,  $23^\circ\text{C}$ ):  $\delta = 200.97$  (br., overlapped, NCP), 34.63 (s, CH), 25.60 (d,  $^3J_{\text{P-C}} = 6.0$  Hz,  $\text{CH}_3$ ) ppm;  $^{31}\text{P}\{^1\text{H}\}$  NMR (243 MHz,  $\text{C}_6\text{D}_6$ ,  $23^\circ\text{C}$ ):  $\delta = 61.44$ (s) ppm; IR (KBr, Nujol mull,  $\text{cm}^{-1}$ ): 2960(s), 2923(s), 2854(m), 1461(m), 1411(w), 1376(w), 1261(m), 1093(s), 1020(s), 863(w), 798(s), 686(w); Anal. calcd for  $\text{C}_{32}\text{H}_{56}\text{Bi}_2\text{P}_4\text{N}_8$ : C 35.11, H 5.16, N 10.24; Found: C 34.97, H 5.05, N 10.18.

**Preparation of  $\{\eta^1, \eta^1\text{-}3,5\text{-Ph}_2\text{dp}\}_2(\text{Bi-Bi})\{\eta^1, \eta^1\text{-}3,5\text{-Ph}_2\text{dp}\}_2$  (**6**):** To a mixture of  $\text{BiCl}_3$  (0.315 g, 1.0 mmol) and  $\text{K}[3,5\text{-Ph}_2\text{dp}] \cdot 0.67\text{THF}^{[2]}$  (**3**, 0.973 g, 3.0 mmol) was added THF (50 mL) via syringe. After the mixture was stirred for 48 hours the volatile components were removed under the reduced pressure. The resultant residue was extracted by toluene ( $5 \times 10$  mL) and the orange-red solution was filtered through Celite. The filtrate was concentrated to about 40 mL to give free ligand  $\text{H}[3,5\text{-Ph}_2\text{dp}]$  as white solid at room temperature. The mother liquor was further concentrated to afford **6** as orange-red crystals at room temperature (0.274 g, 40.2%). M.p.  $> 215^\circ\text{C}$ , turn dark, decomp..  $^1\text{H}$  NMR (600 MHz,  $\text{THF-}d_8$ ,  $23^\circ\text{C}$ ):  $\delta = 8.04$  (d, 16 H, CH), 7.74–7.22 (t, 16 H, CH), 7.09–7.07 (t, 8 H, CH) ppm;  $^{13}\text{C}\{^1\text{H}\}$  NMR (150 MHz,  $\text{THF-}d_8$ ,  $23^\circ\text{C}$ ):  $\delta = 178.12$  (d,  $^1J_{\text{C-P}} = 43.5$  Hz, PCN), 144.29 (d,  $^1J_{\text{C-C}} = 22.5$  Hz, CH for Ph ring), 127.39–124.72 (m, CH for Ph ring) ppm;  $^{31}\text{P}\{^1\text{H}\}$  NMR (243 MHz,  $\text{THF-}d_8$ ,  $23^\circ\text{C}$ ): 67.24(s) ppm; IR (KBr, Nujol mull,  $\text{cm}^{-1}$ ): 2960(s), 2923(vs), 2854(s), 1461(m), 1376(w) 1261(m), 1091(m), 1020(m), 865(vw), 798(m), 694(vw); Anal. calcd for  $\text{C}_{56}\text{H}_{40}\text{Bi}_2\text{P}_4\text{N}_8$ : C 49.21, H 2.95, N 8.20; Found: C 48.97, H 2.77, N 7.95.

2.  $^1\text{H}$ ,  $^{31}\text{P}\{^1\text{H}\}$ ,  $^{13}\text{C}\{^1\text{H}\}$  NMR data for **4**, **5**, and **6**

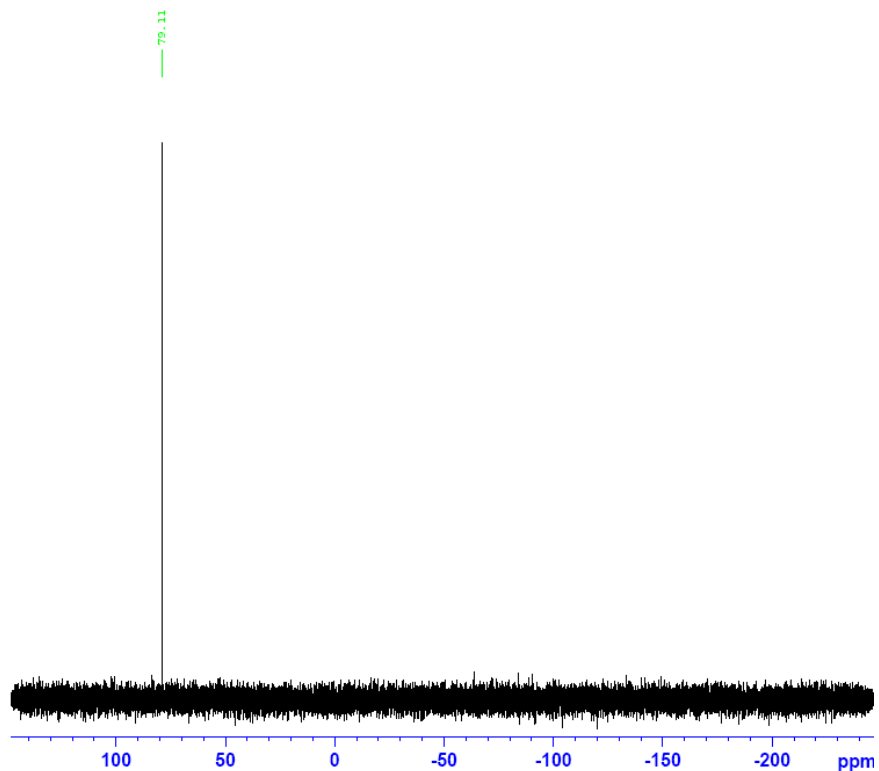

**Figure 1.** The  $^{31}\text{P}$  NMR spectrum of compound **4** in  $\text{THF-}d_8$

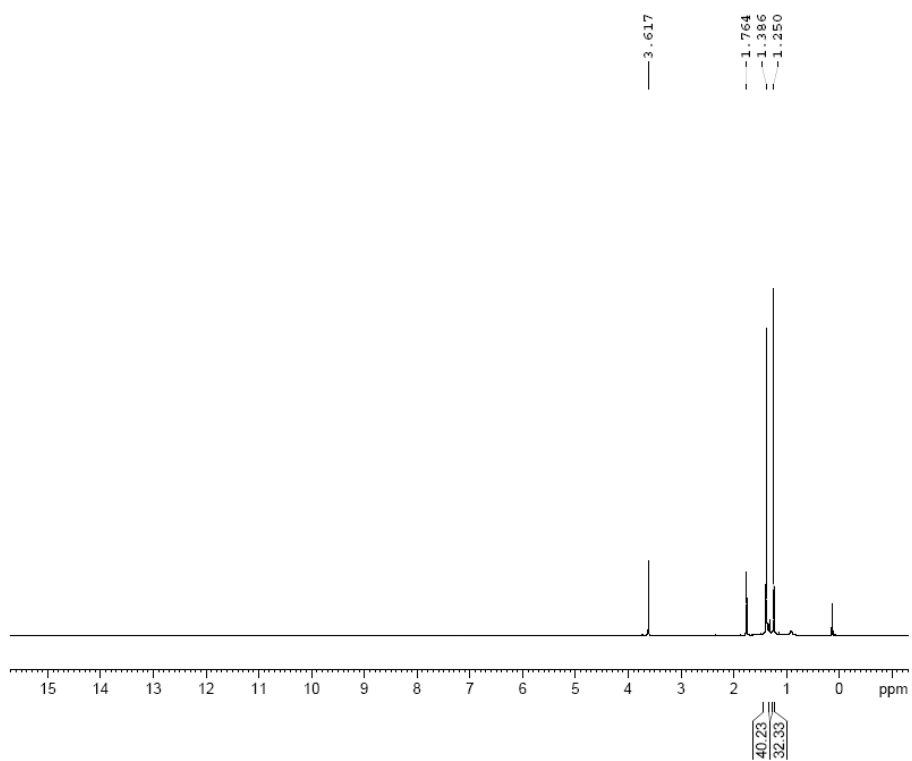

**Figure 2.** The  $^1\text{H}$  NMR spectrum of compound **4** in  $\text{THF-}d_8$

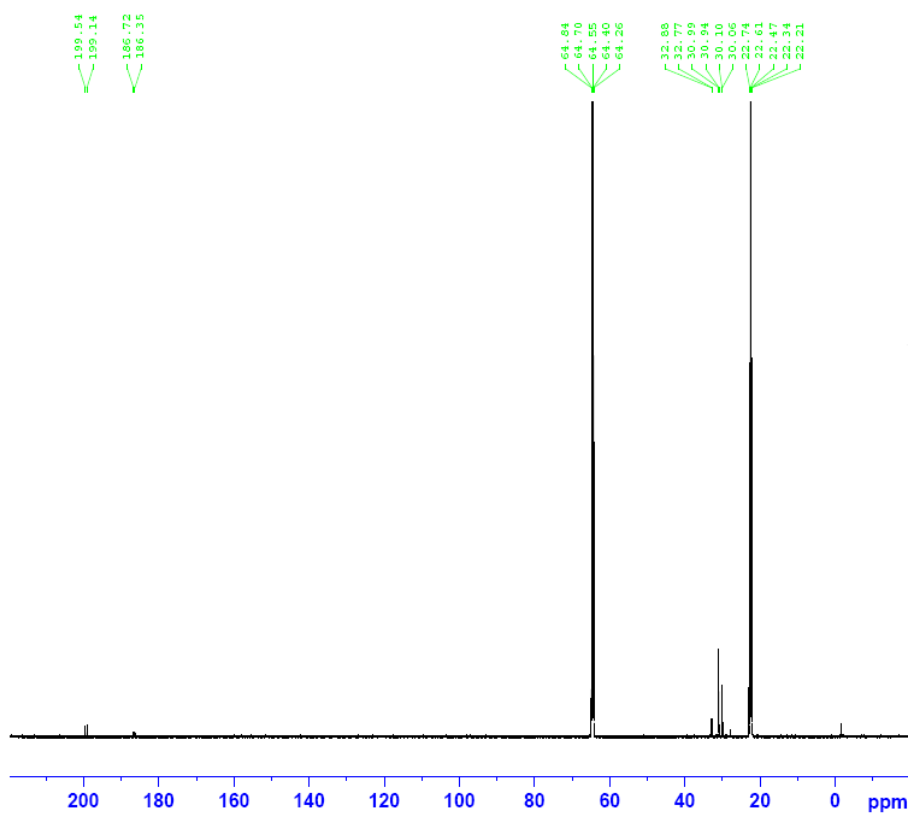

Figure 3. The  $^{13}\text{C}$  NMR spectrum of compound **4** in  $\text{THF-}d_8$

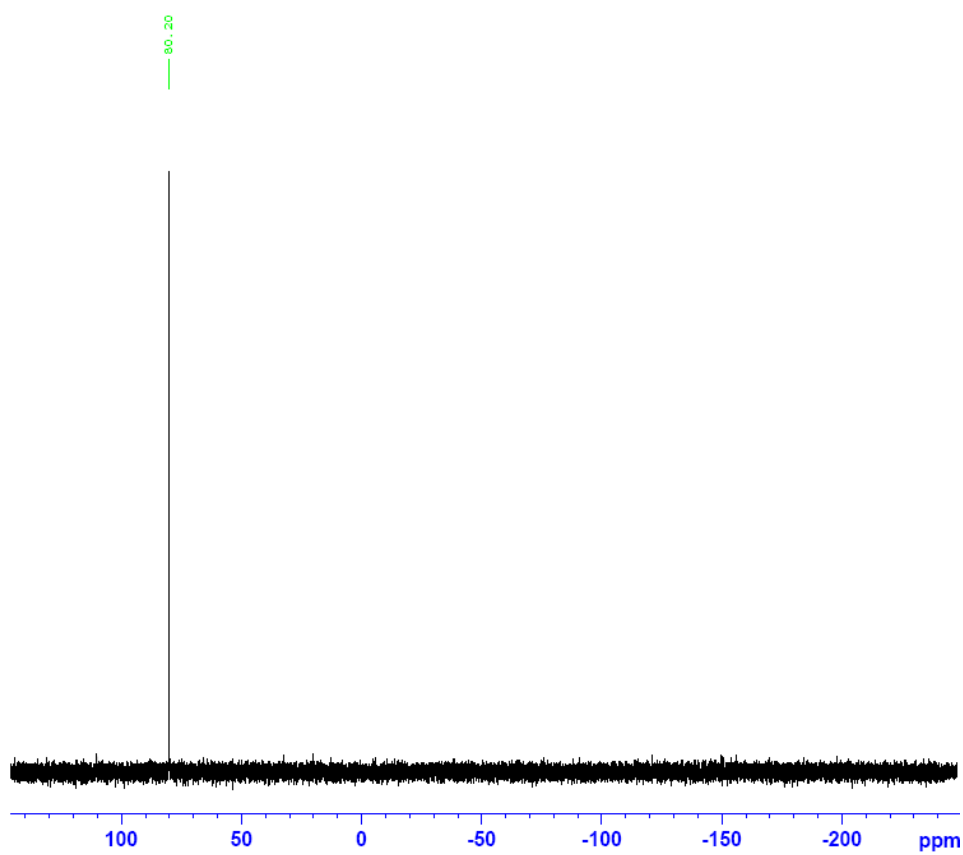

Figure 4. The  $^{31}\text{P}$  NMR spectrum of compound **4** in  $\text{C}_6\text{D}_6$

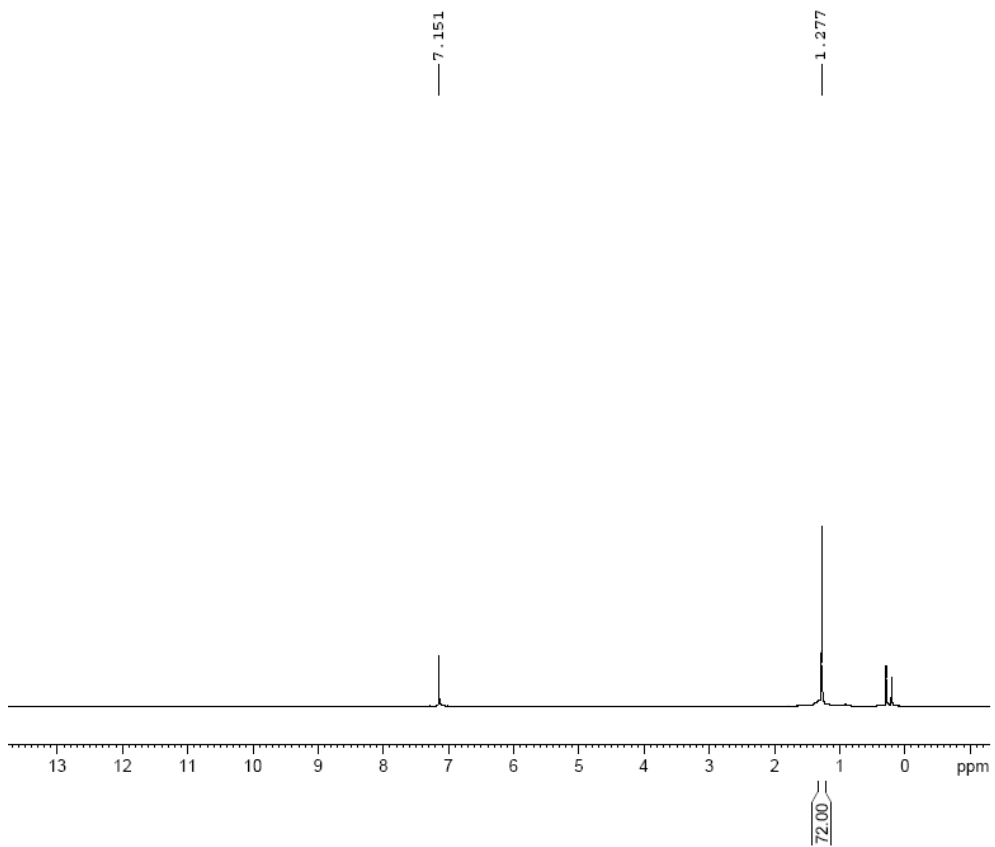

**Figure 5.** The <sup>1</sup>H NMR spectrum of compound 4 in C<sub>6</sub>D<sub>6</sub>

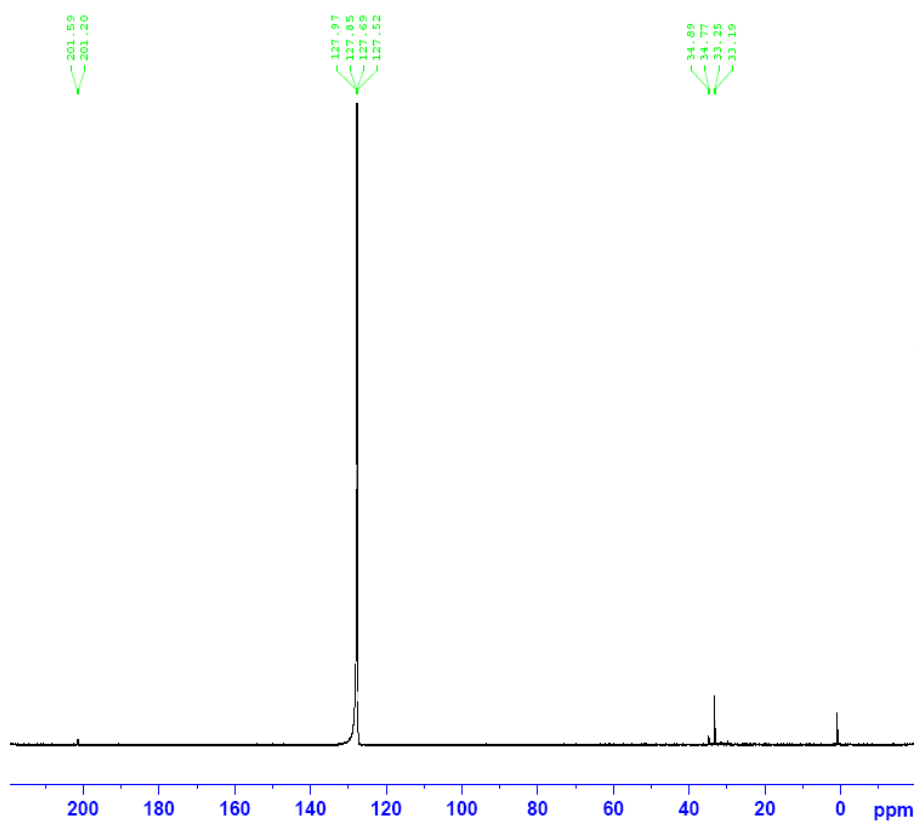

**Figure 6.** The <sup>13</sup>C NMR spectrum of compound 4 in C<sub>6</sub>D<sub>6</sub>

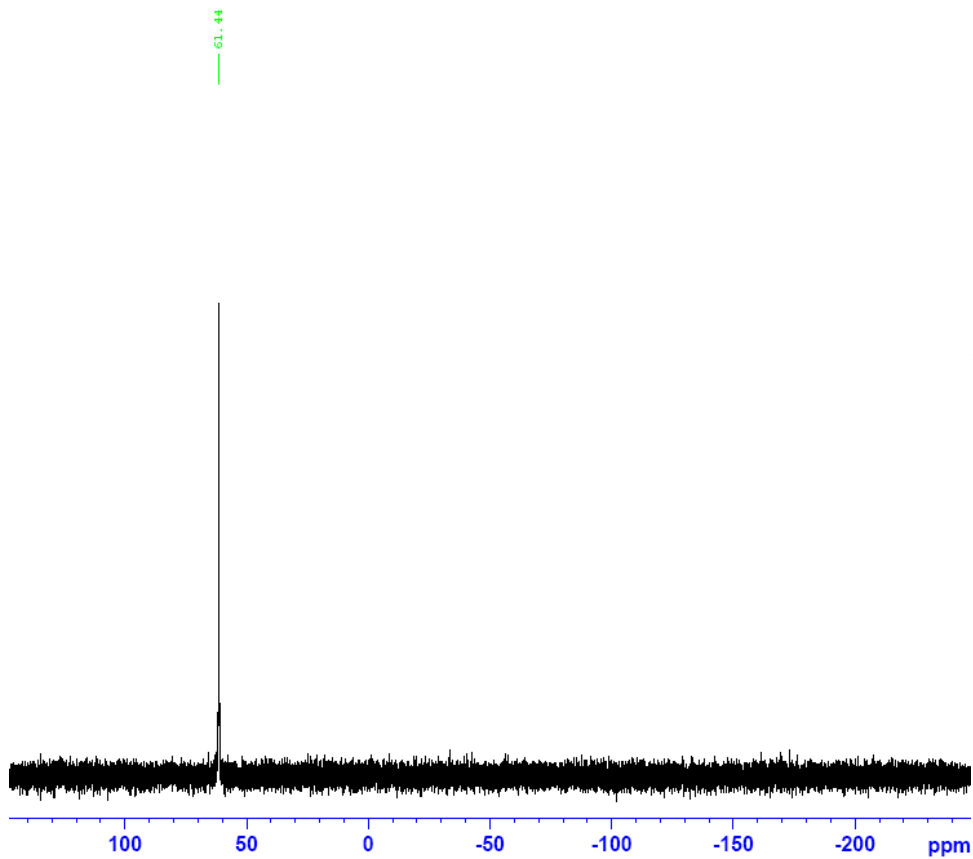

Figure 7. The  $^{31}\text{P}$  NMR spectrum of compound **5** in  $\text{C}_6\text{D}_6$

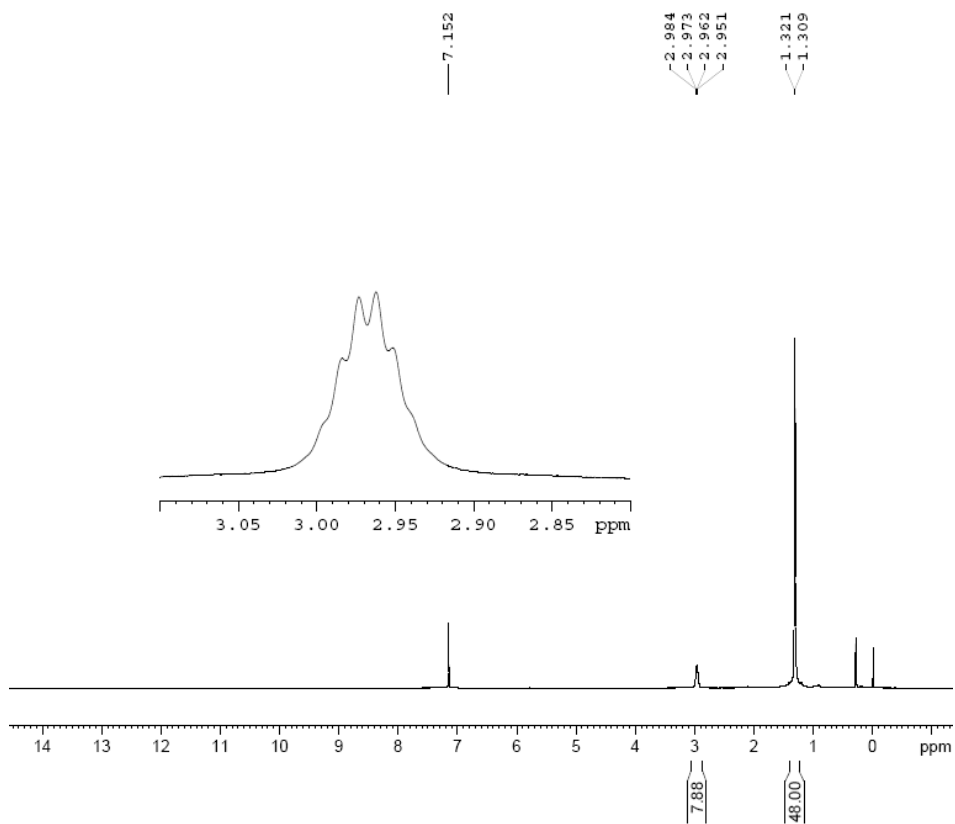

Figure 8. The  $^1\text{H}$  NMR spectrum of compound **5** in  $\text{C}_6\text{D}_6$



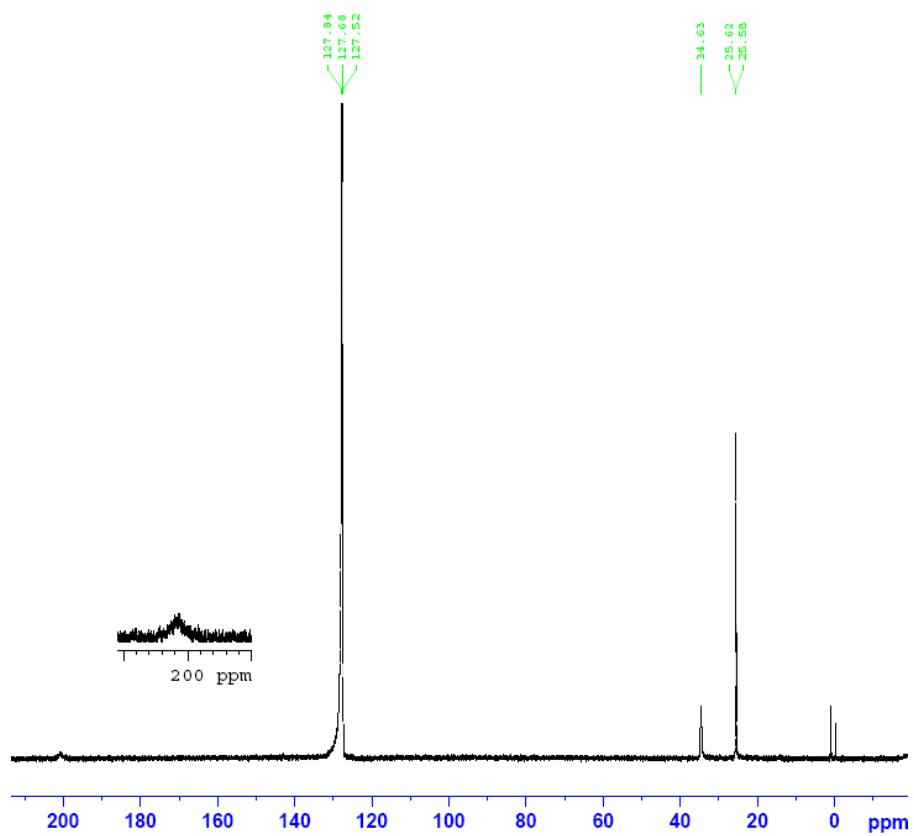

Figure 9. The  $^{13}\text{C}$  NMR spectrum of compound **5** in  $\text{C}_6\text{D}_6$

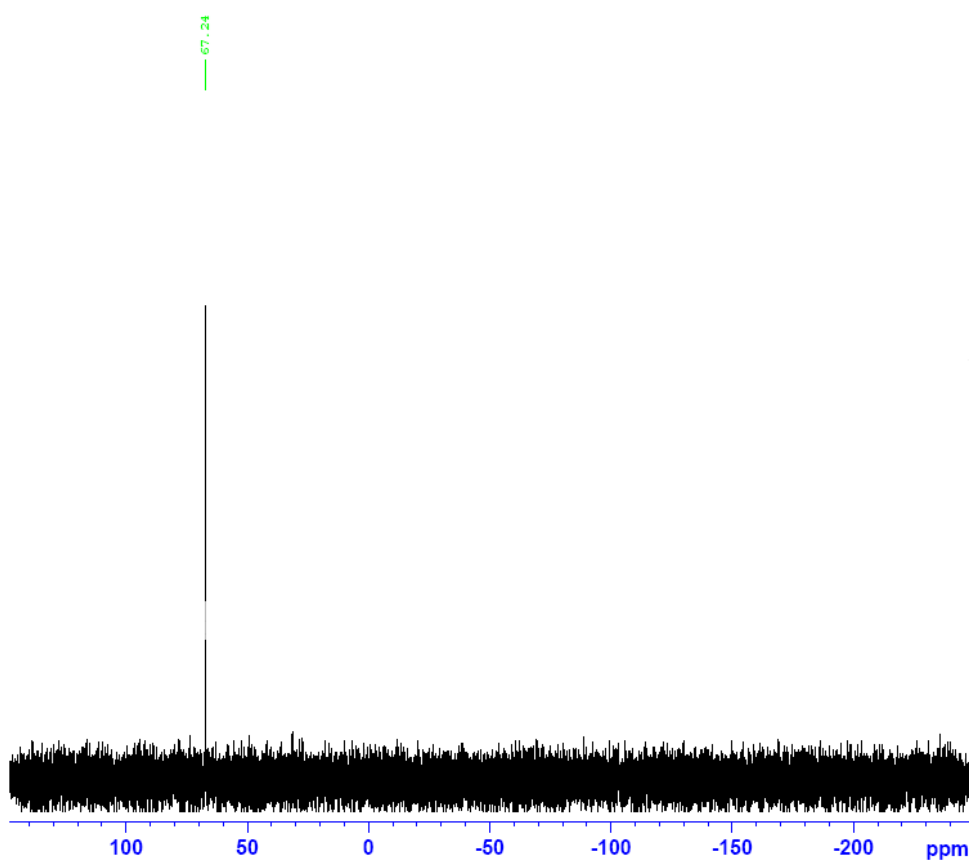

Figure 10. The  $^{31}\text{P}$  NMR spectrum of compound **6** in  $\text{THF-}d_8$

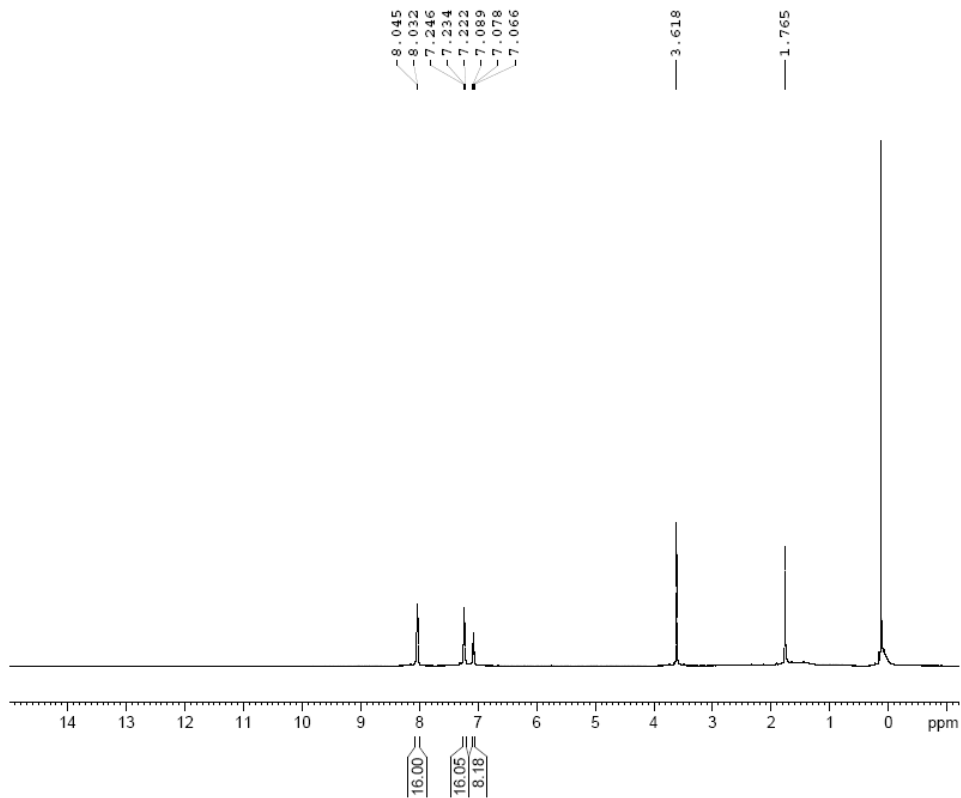

**Figure 11.** The  $^1\text{H}$  NMR spectrum of compound **6** in  $\text{THF-}d_8$

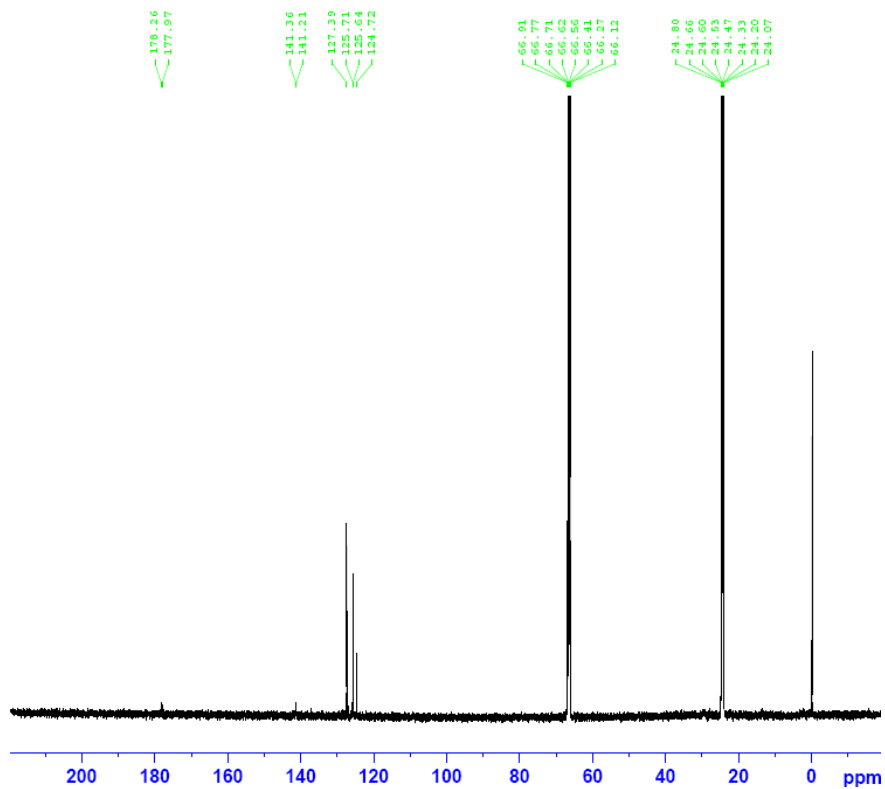

**Figure 12.** The  $^{13}\text{C}$  NMR spectrum of compound **6** in  $\text{THF-}d_8$

### 3. Crystal structural analysis data for 4, 5, and 6

#### 3.1 Crystal structural analysis data for 4

Table 1. Crystal data and structure refinement for 4.

|                                 |                                                                                                                             |
|---------------------------------|-----------------------------------------------------------------------------------------------------------------------------|
| Identification code             | 140731-1a                                                                                                                   |
| Empirical formula               | $C_{40}H_{72}Bi_2N_8P_4$                                                                                                    |
| Formula weight                  | 1206.90                                                                                                                     |
| Temperature                     | 296(2) K                                                                                                                    |
| Wavelength                      | 0.71073 Å                                                                                                                   |
| Crystal system, space group     | Monoclinic, $P21/c$                                                                                                         |
| Unit cell dimensions            | $a = 23.3993(14)$ Å $\alpha = 90$ deg.<br>$b = 10.7452(5)$ Å $\beta = 114.212(8)$<br>$c = 21.7187(17)$ Å $\gamma = 90$ deg. |
| deg.                            |                                                                                                                             |
| Volume                          | 4980.4(5) Å <sup>3</sup>                                                                                                    |
| Z, Calculated density           | 4, 1.610 Mg/m <sup>3</sup>                                                                                                  |
| Absorption coefficient          | 7.220 mm <sup>-1</sup>                                                                                                      |
| $F(000)$                        | 2376                                                                                                                        |
| Crystal size                    | 0.20 × 0.15 × 0.10 mm                                                                                                       |
| Theta range for data collection | 2.86 to 26.50 deg.                                                                                                          |
| Limiting indices                | $-29 \leq h \leq 26$ , $-12 \leq k \leq 13$ , $-26 \leq l \leq 27$                                                          |
| Reflections collected / unique  | 23479 / 10295 [ $R(\text{int}) = 0.0671$ ]                                                                                  |
| Completeness to theta = 26.50   | 99.6 %                                                                                                                      |
| Absorption correction           | Semi-empirical from equivalents                                                                                             |

|                                        |                                        |
|----------------------------------------|----------------------------------------|
| Max. and min. transmission             | 0.5321 and 0.3261                      |
| Refinement method                      | Full-matrix least-squares on $F^2$     |
| Data / restraints / parameters         | 10295 / 0 / 505                        |
| Goodness-of-fit on $F^2$               | 1.065                                  |
| Final $R$ indices [ $I > 2\sigma(I)$ ] | $R_1 = 0.0561$ , $wR_2 = 0.0898$       |
| $R$ indices (all data)                 | $R_1 = 0.0956$ , $wR_2 = 0.1042$       |
| Largest diff. peak and hole            | 1.585 and $-2.066 \text{ e. \AA}^{-3}$ |

Table 2. Atomic coordinates ( $\times 10^4$ ) and equivalent isotropic displacement parameters ( $\text{\AA}^2 \times 10^3$ ) for **4**.  
 $U(\text{eq})$  is defined as one third of the trace of the orthogonalized  $U_{ij}$  tensor.

|        | x        | y         | z        | $U(\text{eq})$ |
|--------|----------|-----------|----------|----------------|
| Bi (1) | 2703 (1) | 1993 (1)  | 2396 (1) | 30 (1)         |
| Bi (2) | 2302 (1) | -387 (1)  | 2560 (1) | 30 (1)         |
| P (1)  | 4039 (1) | 749 (2)   | 4792 (1) | 39 (1)         |
| P (2)  | 1005 (1) | 2516 (2)  | 3249 (1) | 41 (1)         |
| P (3)  | 4017 (1) | -1003 (2) | 1756 (1) | 47 (1)         |
| P (4)  | 936 (1)  | 903 (2)   | 177 (1)  | 42 (1)         |
| N (1)  | 3425 (3) | 1193 (6)  | 3512 (3) | 30 (2)         |
| N (2)  | 3067 (3) | 367 (6)   | 3685 (3) | 32 (2)         |
| N (3)  | 1595 (3) | 1117 (5)  | 2738 (3) | 26 (2)         |
| N (4)  | 1937 (3) | 2194 (6)  | 2913 (4) | 36 (2)         |
| N (5)  | 3246 (3) | 458 (5)   | 1971 (3) | 28 (2)         |
| N (6)  | 3236 (3) | -599 (6)  | 2304 (4) | 33 (2)         |
| N (7)  | 1751 (3) | 213 (6)   | 1349 (4) | 30 (2)         |
| N (8)  | 1736 (3) | 1493 (5)  | 1368 (3) | 25 (2)         |
| C (1)  | 3957 (3) | 1480 (7)  | 4039 (4) | 27 (2)         |
| C (2)  | 3313 (4) | 54 (7)    | 4334 (4) | 28 (2)         |
| C (3)  | 2958 (4) | -810 (8)  | 4598 (5) | 42 (2)         |
| C (4)  | 2883 (6) | -2074 (9) | 4304 (6) | 101 (5)        |
| C (5)  | 3308 (5) | -934 (10) | 5360 (5) | 70 (3)         |

|       |         |           |         |        |
|-------|---------|-----------|---------|--------|
| C(6)  | 2328(5) | -241(10)  | 4465(6) | 93(5)  |
| C(7)  | 4458(4) | 2269(7)   | 3955(5) | 35(2)  |
| C(8)  | 4980(4) | 2596(9)   | 4649(5) | 65(2)  |
| C(9)  | 4196(4) | 3461(9)   | 3574(5) | 65(2)  |
| C(10) | 4741(4) | 1493(9)   | 3558(5) | 60(3)  |
| C(11) | 1074(4) | 1138(7)   | 2852(4) | 31(2)  |
| C(12) | 1689(3) | 3023(7)   | 3185(4) | 26(2)  |
| C(13) | 2007(4) | 4269(7)   | 3446(5) | 37(2)  |
| C(14) | 1766(5) | 4844(9)   | 3930(6) | 76(4)  |
| C(15) | 1852(5) | 5155(8)   | 2848(6) | 69(4)  |
| C(16) | 2721(4) | 4135(9)   | 3809(5) | 66(3)  |
| C(17) | 596(4)  | 110(8)    | 2622(5) | 35(2)  |
| C(18) | 135(5)  | 239(10)   | 2940(6) | 83(4)  |
| C(19) | 245(5)  | 235(11)   | 1861(6) | 93(4)  |
| C(20) | 878(5)  | -1183(9)  | 2767(7) | 98(5)  |
| C(21) | 3614(4) | 403(7)    | 1638(4) | 34(2)  |
| C(22) | 3620(3) | -1470(7)  | 2251(4) | 28(2)  |
| C(23) | 3744(4) | -2683(8)  | 2639(5) | 39(2)  |
| C(24) | 4083(6) | -2430(10) | 3377(5) | 92(4)  |
| C(25) | 3138(5) | -3360(10) | 2508(7) | 113(6) |
| C(26) | 4144(5) | -3546(9)  | 2431(6) | 69(3)  |
| C(27) | 3637(4) | 1457(9)   | 1194(5) | 46(3)  |
| C(28) | 4054(5) | 1112(9)   | 839(5)  | 77(4)  |
| C(29) | 3914(5) | 2633(10)  | 1620(5) | 75(4)  |
| C(30) | 2983(5) | 1727(10)  | 689(6)  | 77(4)  |
| C(31) | 1366(4) | -239(7)   | 769(5)  | 34(2)  |
| C(32) | 1331(4) | 1998(7)   | 798(4)  | 28(2)  |
| C(33) | 1218(4) | 3383(8)   | 750(5)  | 39(2)  |
| C(34) | 832(5)  | 3754(9)   | 26(5)   | 77(4)  |
| C(35) | 844(4)  | 3686(9)   | 1161(5) | 61(3)  |
| C(36) | 1829(4) | 4136(8)   | 1009(6) | 67(3)  |
| C(37) | 1337(4) | -1634(7)  | 621(4)  | 32(2)  |
| C(38) | 888(5)  | -1882(8)  | -103(5) | 67(3)  |
| C(39) | 1110(5) | -2313(8)  | 1090(5) | 68(3)  |
| C(40) | 1989(4) | -2031(7)  | 714(5)  | 54(3)  |

Table 3. Bond lengths [Å] and angles [deg] for **4**.

|            |          |
|------------|----------|
| Bi(1)–N(1) | 2.472(7) |
| Bi(1)–N(5) | 2.480(6) |
| Bi(1)–N(4) | 2.483(6) |

|               |             |
|---------------|-------------|
| Bi (1)-N(8)   | 2. 500 (6)  |
| Bi (1)-Bi (2) | 2. 7964 (4) |
| Bi (2)-N(3)   | 2. 454 (6)  |
| Bi (2)-N(6)   | 2. 475 (5)  |
| Bi (2)-N(7)   | 2. 492 (7)  |
| Bi (2)-N(2)   | 2. 499 (7)  |
| P(1)-C (2)    | 1. 746 (8)  |
| P(1)-C (1)    | 1. 753 (8)  |
| P(2)-C (12)   | 1. 748 (7)  |
| P(2)-C (11)   | 1. 753 (8)  |
| P(3)-C (21)   | 1. 743 (8)  |
| P(3)-C (22)   | 1. 756 (7)  |
| P(4)-C (32)   | 1. 743 (8)  |
| P(4)-C (31)   | 1. 765 (8)  |
| N(1)-C (1)    | 1. 336 (9)  |
| N(1)-N(2)     | 1. 374 (8)  |
| N(2)-C (2)    | 1. 329 (9)  |
| N(3)-C (11)   | 1. 341 (8)  |
| N(3)-N(4)     | 1. 368 (8)  |
| N(4)-C (12)   | 1. 328 (9)  |
| N(5)-C (21)   | 1. 334 (9)  |
| N(5)-N(6)     | 1. 352 (8)  |
| N(6)-C (22)   | 1. 336 (9)  |
| N(7)-C (31)   | 1. 305 (10) |
| N(7)-N(8)     | 1. 377 (8)  |
| N(8)-C (32)   | 1. 328 (9)  |
| C (1)-C (7)   | 1. 517 (10) |
| C (2)-C (3)   | 1. 507 (10) |
| C (3)-C (4)   | 1. 481 (12) |
| C (3)-C (6)   | 1. 509 (11) |
| C (3)-C (5)   | 1. 521 (12) |
| C (4)-H (4A)  | 0. 9600     |
| C (4)-H (4B)  | 0. 9600     |
| C (4)-H (4C)  | 0. 9600     |
| C (5)-H (5A)  | 0. 9600     |
| C (5)-H (5B)  | 0. 9600     |
| C (5)-H (5C)  | 0. 9600     |
| C (6)-H (6A)  | 0. 9600     |
| C (6)-H (6B)  | 0. 9600     |
| C (6)-H (6C)  | 0. 9600     |
| C (7)-C (9)   | 1. 511 (11) |
| C (7)-C (10)  | 1. 530 (11) |
| C (7)-C (8)   | 1. 543 (12) |
| C (8)-H (8A)  | 0. 9600     |

|              |           |
|--------------|-----------|
| C(8)-H(8B)   | 0.9600    |
| C(8)-H(8C)   | 0.9600    |
| C(9)-H(9A)   | 0.9600    |
| C(9)-H(9B)   | 0.9600    |
| C(9)-H(9C)   | 0.9600    |
| C(10)-H(10A) | 0.9600    |
| C(10)-H(10B) | 0.9600    |
| C(10)-H(10C) | 0.9600    |
| C(11)-C(17)  | 1.504(10) |
| C(12)-C(13)  | 1.524(10) |
| C(13)-C(14)  | 1.513(11) |
| C(13)-C(15)  | 1.529(12) |
| C(13)-C(16)  | 1.534(11) |
| C(14)-H(14A) | 0.9600    |
| C(14)-H(14B) | 0.9600    |
| C(14)-H(14C) | 0.9600    |
| C(15)-H(15A) | 0.9600    |
| C(15)-H(15B) | 0.9600    |
| C(15)-H(15C) | 0.9600    |
| C(16)-H(16A) | 0.9600    |
| C(16)-H(16B) | 0.9600    |
| C(16)-H(16C) | 0.9600    |
| C(17)-C(18)  | 1.508(10) |
| C(17)-C(20)  | 1.515(12) |
| C(17)-C(19)  | 1.521(13) |
| C(18)-H(18A) | 0.9600    |
| C(18)-H(18B) | 0.9600    |
| C(18)-H(18C) | 0.9600    |
| C(19)-H(19A) | 0.9600    |
| C(19)-H(19B) | 0.9600    |
| C(19)-H(19C) | 0.9600    |
| C(20)-H(20A) | 0.9600    |
| C(20)-H(20B) | 0.9600    |
| C(20)-H(20C) | 0.9600    |
| C(21)-C(27)  | 1.503(11) |
| C(22)-C(23)  | 1.514(11) |
| C(23)-C(24)  | 1.494(13) |
| C(23)-C(25)  | 1.513(12) |
| C(23)-C(26)  | 1.513(11) |
| C(24)-H(24A) | 0.9600    |
| C(24)-H(24B) | 0.9600    |
| C(24)-H(24C) | 0.9600    |
| C(25)-H(25A) | 0.9600    |
| C(25)-H(25B) | 0.9600    |

|              |           |
|--------------|-----------|
| C(25)-H(25C) | 0.9600    |
| C(26)-H(26A) | 0.9600    |
| C(26)-H(26B) | 0.9600    |
| C(26)-H(26C) | 0.9600    |
| C(27)-C(30)  | 1.502(13) |
| C(27)-C(28)  | 1.514(11) |
| C(27)-C(29)  | 1.543(13) |
| C(28)-H(28A) | 0.9600    |
| C(28)-H(28B) | 0.9600    |
| C(28)-H(28C) | 0.9600    |
| C(29)-H(29A) | 0.9600    |
| C(29)-H(29B) | 0.9600    |
| C(29)-H(29C) | 0.9600    |
| C(30)-H(30A) | 0.9600    |
| C(30)-H(30B) | 0.9600    |
| C(30)-H(30C) | 0.9600    |
| C(31)-C(37)  | 1.529(10) |
| C(32)-C(33)  | 1.507(10) |
| C(33)-C(34)  | 1.509(12) |
| C(33)-C(35)  | 1.519(11) |
| C(33)-C(36)  | 1.535(11) |
| C(34)-H(34A) | 0.9600    |
| C(34)-H(34B) | 0.9600    |
| C(34)-H(34C) | 0.9600    |
| C(35)-H(35A) | 0.9600    |
| C(35)-H(35B) | 0.9600    |
| C(35)-H(35C) | 0.9600    |
| C(36)-H(36A) | 0.9600    |
| C(36)-H(36B) | 0.9600    |
| C(36)-H(36C) | 0.9600    |
| C(37)-C(38)  | 1.514(12) |
| C(37)-C(40)  | 1.515(10) |
| C(37)-C(39)  | 1.515(11) |
| C(38)-H(38A) | 0.9600    |
| C(38)-H(38B) | 0.9600    |
| C(38)-H(38C) | 0.9600    |
| C(39)-H(39A) | 0.9600    |
| C(39)-H(39B) | 0.9600    |
| C(39)-H(39C) | 0.9600    |
| C(40)-H(40A) | 0.9600    |
| C(40)-H(40B) | 0.9600    |
| C(40)-H(40C) | 0.9600    |

N(1)-Bi(1)-N(5) 83.4(2)



|                  |            |
|------------------|------------|
| N(1)-Bi(1)-N(4)  | 85.2(2)    |
| N(5)-Bi(1)-N(4)  | 143.23(19) |
| N(1)-Bi(1)-N(8)  | 143.7(2)   |
| N(5)-Bi(1)-N(8)  | 86.5(2)    |
| N(4)-Bi(1)-N(8)  | 82.3(2)    |
| N(1)-Bi(1)-Bi(2) | 71.80(14)  |
| N(5)-Bi(1)-Bi(2) | 71.87(13)  |
| N(4)-Bi(1)-Bi(2) | 71.35(14)  |
| N(8)-Bi(1)-Bi(2) | 71.90(14)  |
| N(3)-Bi(2)-N(6)  | 144.1(2)   |
| N(3)-Bi(2)-N(7)  | 84.6(2)    |
| N(6)-Bi(2)-N(7)  | 84.8(2)    |
| N(3)-Bi(2)-N(2)  | 83.8(2)    |
| N(6)-Bi(2)-N(2)  | 84.5(2)    |
| N(7)-Bi(2)-N(2)  | 143.2(2)   |
| N(3)-Bi(2)-Bi(1) | 72.57(13)  |
| N(6)-Bi(2)-Bi(1) | 71.50(14)  |
| N(7)-Bi(2)-Bi(1) | 71.61(14)  |
| N(2)-Bi(2)-Bi(1) | 71.61(15)  |
| C(2)-P(1)-C(1)   | 87.2(4)    |
| C(12)-P(2)-C(11) | 87.3(4)    |
| C(21)-P(3)-C(22) | 87.0(4)    |
| C(32)-P(4)-C(31) | 86.7(4)    |
| C(1)-N(1)-N(2)   | 111.9(7)   |
| C(1)-N(1)-Bi(1)  | 141.4(5)   |
| N(2)-N(1)-Bi(1)  | 104.1(4)   |
| C(2)-N(2)-N(1)   | 114.0(6)   |
| C(2)-N(2)-Bi(2)  | 141.2(5)   |
| N(1)-N(2)-Bi(2)  | 102.5(5)   |
| C(11)-N(3)-N(4)  | 114.0(6)   |
| C(11)-N(3)-Bi(2) | 139.7(5)   |
| N(4)-N(3)-Bi(2)  | 104.2(4)   |
| C(12)-N(4)-N(3)  | 112.2(6)   |
| C(12)-N(4)-Bi(1) | 142.0(5)   |
| N(3)-N(4)-Bi(1)  | 104.4(4)   |
| C(21)-N(5)-N(6)  | 114.3(6)   |
| C(21)-N(5)-Bi(1) | 140.7(5)   |
| N(6)-N(5)-Bi(1)  | 103.6(4)   |
| C(22)-N(6)-N(5)  | 112.4(6)   |
| C(22)-N(6)-Bi(2) | 140.5(5)   |
| N(5)-N(6)-Bi(2)  | 104.7(4)   |
| C(31)-N(7)-N(8)  | 112.6(7)   |
| C(31)-N(7)-Bi(2) | 140.9(5)   |
| N(8)-N(7)-Bi(2)  | 103.6(5)   |

|                  |          |
|------------------|----------|
| C(32)-N(8)-N(7)  | 113.4(7) |
| C(32)-N(8)-Bi(1) | 141.6(5) |
| N(7)-N(8)-Bi(1)  | 102.5(5) |
| N(1)-C(1)-C(7)   | 121.3(7) |
| N(1)-C(1)-P(1)   | 113.7(6) |
| C(7)-C(1)-P(1)   | 124.7(6) |
| N(2)-C(2)-C(3)   | 119.6(7) |
| N(2)-C(2)-P(1)   | 113.1(5) |
| C(3)-C(2)-P(1)   | 127.3(7) |
| C(4)-C(3)-C(2)   | 112.7(7) |
| C(4)-C(3)-C(6)   | 110.9(9) |
| C(2)-C(3)-C(6)   | 108.9(8) |
| C(4)-C(3)-C(5)   | 107.7(9) |
| C(2)-C(3)-C(5)   | 109.5(7) |
| C(6)-C(3)-C(5)   | 107.0(8) |
| C(3)-C(4)-H(4A)  | 109.5    |
| C(3)-C(4)-H(4B)  | 109.5    |
| H(4A)-C(4)-H(4B) | 109.5    |
| C(3)-C(4)-H(4C)  | 109.5    |
| H(4A)-C(4)-H(4C) | 109.5    |
| H(4B)-C(4)-H(4C) | 109.5    |
| C(3)-C(5)-H(5A)  | 109.5    |
| C(3)-C(5)-H(5B)  | 109.5    |
| H(5A)-C(5)-H(5B) | 109.5    |
| C(3)-C(5)-H(5C)  | 109.5    |
| H(5A)-C(5)-H(5C) | 109.5    |
| H(5B)-C(5)-H(5C) | 109.5    |
| C(3)-C(6)-H(6A)  | 109.5    |
| C(3)-C(6)-H(6B)  | 109.5    |
| H(6A)-C(6)-H(6B) | 109.5    |
| C(3)-C(6)-H(6C)  | 109.5    |
| H(6A)-C(6)-H(6C) | 109.5    |
| H(6B)-C(6)-H(6C) | 109.5    |
| C(9)-C(7)-C(1)   | 112.4(6) |
| C(9)-C(7)-C(10)  | 109.0(8) |
| C(1)-C(7)-C(10)  | 107.3(7) |
| C(9)-C(7)-C(8)   | 108.8(7) |
| C(1)-C(7)-C(8)   | 110.5(7) |
| C(10)-C(7)-C(8)  | 108.8(7) |
| C(7)-C(8)-H(8A)  | 109.5    |
| C(7)-C(8)-H(8B)  | 109.5    |
| H(8A)-C(8)-H(8B) | 109.5    |
| C(7)-C(8)-H(8C)  | 109.5    |
| H(8A)-C(8)-H(8C) | 109.5    |

|                     |          |
|---------------------|----------|
| H(8B)-C(8)-H(8C)    | 109.5    |
| C(7)-C(9)-H(9A)     | 109.5    |
| C(7)-C(9)-H(9B)     | 109.5    |
| H(9A)-C(9)-H(9B)    | 109.5    |
| C(7)-C(9)-H(9C)     | 109.5    |
| H(9A)-C(9)-H(9C)    | 109.5    |
| H(9B)-C(9)-H(9C)    | 109.5    |
| C(7)-C(10)-H(10A)   | 109.5    |
| C(7)-C(10)-H(10B)   | 109.5    |
| H(10A)-C(10)-H(10B) | 109.5    |
| C(7)-C(10)-H(10C)   | 109.5    |
| H(10A)-C(10)-H(10C) | 109.5    |
| H(10B)-C(10)-H(10C) | 109.5    |
| N(3)-C(11)-C(17)    | 122.4(7) |
| N(3)-C(11)-P(2)     | 112.2(6) |
| C(17)-C(11)-P(2)    | 125.3(6) |
| N(4)-C(12)-C(13)    | 121.2(6) |
| N(4)-C(12)-P(2)     | 114.1(6) |
| C(13)-C(12)-P(2)    | 124.6(6) |
| C(14)-C(13)-C(12)   | 110.6(7) |
| C(14)-C(13)-C(15)   | 108.0(8) |
| C(12)-C(13)-C(15)   | 108.8(7) |
| C(14)-C(13)-C(16)   | 108.6(8) |
| C(12)-C(13)-C(16)   | 111.9(7) |
| C(15)-C(13)-C(16)   | 108.9(8) |
| C(13)-C(14)-H(14A)  | 109.5    |
| C(13)-C(14)-H(14B)  | 109.5    |
| H(14A)-C(14)-H(14B) | 109.5    |
| C(13)-C(14)-H(14C)  | 109.5    |
| H(14A)-C(14)-H(14C) | 109.5    |
| H(14B)-C(14)-H(14C) | 109.5    |
| C(13)-C(15)-H(15A)  | 109.5    |
| C(13)-C(15)-H(15B)  | 109.5    |
| H(15A)-C(15)-H(15B) | 109.5    |
| C(13)-C(15)-H(15C)  | 109.5    |
| H(15A)-C(15)-H(15C) | 109.5    |
| H(15B)-C(15)-H(15C) | 109.5    |
| C(13)-C(16)-H(16A)  | 109.5    |
| C(13)-C(16)-H(16B)  | 109.5    |
| H(16A)-C(16)-H(16B) | 109.5    |
| C(13)-C(16)-H(16C)  | 109.5    |
| H(16A)-C(16)-H(16C) | 109.5    |
| H(16B)-C(16)-H(16C) | 109.5    |
| C(11)-C(17)-C(18)   | 110.7(7) |

|                     |          |
|---------------------|----------|
| C(11)-C(17)-C(20)   | 113.8(7) |
| C(18)-C(17)-C(20)   | 108.8(8) |
| C(11)-C(17)-C(19)   | 107.0(7) |
| C(18)-C(17)-C(19)   | 108.7(8) |
| C(20)-C(17)-C(19)   | 107.6(9) |
| C(17)-C(18)-H(18A)  | 109.5    |
| C(17)-C(18)-H(18B)  | 109.5    |
| H(18A)-C(18)-H(18B) | 109.5    |
| C(17)-C(18)-H(18C)  | 109.5    |
| H(18A)-C(18)-H(18C) | 109.5    |
| H(18B)-C(18)-H(18C) | 109.5    |
| C(17)-C(19)-H(19A)  | 109.5    |
| C(17)-C(19)-H(19B)  | 109.5    |
| H(19A)-C(19)-H(19B) | 109.5    |
| C(17)-C(19)-H(19C)  | 109.5    |
| H(19A)-C(19)-H(19C) | 109.5    |
| H(19B)-C(19)-H(19C) | 109.5    |
| C(17)-C(20)-H(20A)  | 109.5    |
| C(17)-C(20)-H(20B)  | 109.5    |
| H(20A)-C(20)-H(20B) | 109.5    |
| C(17)-C(20)-H(20C)  | 109.5    |
| H(20A)-C(20)-H(20C) | 109.5    |
| H(20B)-C(20)-H(20C) | 109.5    |
| N(5)-C(21)-C(27)    | 121.1(7) |
| N(5)-C(21)-P(3)     | 112.9(6) |
| C(27)-C(21)-P(3)    | 126.0(6) |
| N(6)-C(22)-C(23)    | 122.4(7) |
| N(6)-C(22)-P(3)     | 113.4(6) |
| C(23)-C(22)-P(3)    | 123.9(6) |
| C(24)-C(23)-C(25)   | 109.4(9) |
| C(24)-C(23)-C(26)   | 108.1(8) |
| C(25)-C(23)-C(26)   | 107.2(9) |
| C(24)-C(23)-C(22)   | 109.7(8) |
| C(25)-C(23)-C(22)   | 111.0(7) |
| C(26)-C(23)-C(22)   | 111.2(7) |
| C(23)-C(24)-H(24A)  | 109.5    |
| C(23)-C(24)-H(24B)  | 109.5    |
| H(24A)-C(24)-H(24B) | 109.5    |
| C(23)-C(24)-H(24C)  | 109.5    |
| H(24A)-C(24)-H(24C) | 109.5    |
| H(24B)-C(24)-H(24C) | 109.5    |
| C(23)-C(25)-H(25A)  | 109.5    |
| C(23)-C(25)-H(25B)  | 109.5    |
| H(25A)-C(25)-H(25B) | 109.5    |

|                     |          |
|---------------------|----------|
| C(23)–C(25)–H(25C)  | 109.5    |
| H(25A)–C(25)–H(25C) | 109.5    |
| H(25B)–C(25)–H(25C) | 109.5    |
| C(23)–C(26)–H(26A)  | 109.5    |
| C(23)–C(26)–H(26B)  | 109.5    |
| H(26A)–C(26)–H(26B) | 109.5    |
| C(23)–C(26)–H(26C)  | 109.5    |
| H(26A)–C(26)–H(26C) | 109.5    |
| H(26B)–C(26)–H(26C) | 109.5    |
| C(30)–C(27)–C(21)   | 108.7(8) |
| C(30)–C(27)–C(28)   | 110.6(9) |
| C(21)–C(27)–C(28)   | 110.0(7) |
| C(30)–C(27)–C(29)   | 109.4(8) |
| C(21)–C(27)–C(29)   | 110.4(8) |
| C(28)–C(27)–C(29)   | 107.8(8) |
| C(27)–C(28)–H(28A)  | 109.5    |
| C(27)–C(28)–H(28B)  | 109.5    |
| H(28A)–C(28)–H(28B) | 109.5    |
| C(27)–C(28)–H(28C)  | 109.5    |
| H(28A)–C(28)–H(28C) | 109.5    |
| H(28B)–C(28)–H(28C) | 109.5    |
| C(27)–C(29)–H(29A)  | 109.5    |
| C(27)–C(29)–H(29B)  | 109.5    |
| H(29A)–C(29)–H(29B) | 109.5    |
| C(27)–C(29)–H(29C)  | 109.5    |
| H(29A)–C(29)–H(29C) | 109.5    |
| H(29B)–C(29)–H(29C) | 109.5    |
| C(27)–C(30)–H(30A)  | 109.5    |
| C(27)–C(30)–H(30B)  | 109.5    |
| H(30A)–C(30)–H(30B) | 109.5    |
| C(27)–C(30)–H(30C)  | 109.5    |
| H(30A)–C(30)–H(30C) | 109.5    |
| H(30B)–C(30)–H(30C) | 109.5    |
| N(7)–C(31)–C(37)    | 121.4(8) |
| N(7)–C(31)–P(4)     | 114.0(6) |
| C(37)–C(31)–P(4)    | 124.4(7) |
| N(8)–C(32)–C(33)    | 120.4(8) |
| N(8)–C(32)–P(4)     | 113.3(5) |
| C(33)–C(32)–P(4)    | 126.2(6) |
| C(32)–C(33)–C(34)   | 110.3(8) |
| C(32)–C(33)–C(35)   | 107.3(7) |
| C(34)–C(33)–C(35)   | 108.2(8) |
| C(32)–C(33)–C(36)   | 112.6(7) |
| C(34)–C(33)–C(36)   | 108.2(8) |

|                     |          |
|---------------------|----------|
| C(35)–C(33)–C(36)   | 110.2(8) |
| C(33)–C(34)–H(34A)  | 109.5    |
| C(33)–C(34)–H(34B)  | 109.5    |
| H(34A)–C(34)–H(34B) | 109.5    |
| C(33)–C(34)–H(34C)  | 109.5    |
| H(34A)–C(34)–H(34C) | 109.5    |
| H(34B)–C(34)–H(34C) | 109.5    |
| C(33)–C(35)–H(35A)  | 109.5    |
| C(33)–C(35)–H(35B)  | 109.5    |
| H(35A)–C(35)–H(35B) | 109.5    |
| C(33)–C(35)–H(35C)  | 109.5    |
| H(35A)–C(35)–H(35C) | 109.5    |
| H(35B)–C(35)–H(35C) | 109.5    |
| C(33)–C(36)–H(36A)  | 109.5    |
| C(33)–C(36)–H(36B)  | 109.5    |
| H(36A)–C(36)–H(36B) | 109.5    |
| C(33)–C(36)–H(36C)  | 109.5    |
| H(36A)–C(36)–H(36C) | 109.5    |
| H(36B)–C(36)–H(36C) | 109.5    |
| C(38)–C(37)–C(40)   | 108.8(7) |
| C(38)–C(37)–C(39)   | 109.1(8) |
| C(40)–C(37)–C(39)   | 112.7(8) |
| C(38)–C(37)–C(31)   | 110.0(7) |
| C(40)–C(37)–C(31)   | 107.0(6) |
| C(39)–C(37)–C(31)   | 109.2(7) |
| C(37)–C(38)–H(38A)  | 109.5    |
| C(37)–C(38)–H(38B)  | 109.5    |
| H(38A)–C(38)–H(38B) | 109.5    |
| C(37)–C(38)–H(38C)  | 109.5    |
| H(38A)–C(38)–H(38C) | 109.5    |
| H(38B)–C(38)–H(38C) | 109.5    |
| C(37)–C(39)–H(39A)  | 109.5    |
| C(37)–C(39)–H(39B)  | 109.5    |
| H(39A)–C(39)–H(39B) | 109.5    |
| C(37)–C(39)–H(39C)  | 109.5    |
| H(39A)–C(39)–H(39C) | 109.5    |
| H(39B)–C(39)–H(39C) | 109.5    |
| C(37)–C(40)–H(40A)  | 109.5    |
| C(37)–C(40)–H(40B)  | 109.5    |
| H(40A)–C(40)–H(40B) | 109.5    |
| C(37)–C(40)–H(40C)  | 109.5    |
| H(40A)–C(40)–H(40C) | 109.5    |
| H(40B)–C(40)–H(40C) | 109.5    |

Symmetry transformations used to generate equivalent atoms:

Table 4. Anisotropic displacement parameters ( $\text{\AA}^2 \times 10^3$ ) for **4**.

The anisotropic displacement factor exponent takes the form:

$$-2 \pi^2 [ h^2 a^{*2} U_{11} + \dots + 2 h k a^* b^* U_{12} ]$$

|        | U11     | U22     | U33     | U23    | U13     | U12    |
|--------|---------|---------|---------|--------|---------|--------|
| Bi (1) | 28(1)   | 23(1)   | 39(1)   | 2(1)   | 16(1)   | -3(1)  |
| Bi (2) | 28(1)   | 22(1)   | 42(1)   | 2(1)   | 17(1)   | -2(1)  |
| P(1)   | 34(1)   | 44(1)   | 33(2)   | 7(1)   | 8(1)    | -9(1)  |
| P(2)   | 32(1)   | 38(1)   | 63(2)   | -10(1) | 28(1)   | -2(1)  |
| P(3)   | 50(2)   | 46(2)   | 62(2)   | 18(1)  | 39(2)   | 21(1)  |
| P(4)   | 41(1)   | 36(1)   | 35(2)   | -5(1)  | 2(1)    | 4(1)   |
| N(1)   | 22(4)   | 40(4)   | 27(4)   | 10(3)  | 9(3)    | -15(3) |
| N(2)   | 24(4)   | 46(4)   | 28(5)   | -6(4)  | 12(3)   | -11(3) |
| N(3)   | 23(4)   | 20(3)   | 38(5)   | 0(3)   | 15(3)   | -2(3)  |
| N(4)   | 25(4)   | 20(4)   | 70(6)   | 14(4)  | 28(4)   | 8(3)   |
| N(5)   | 29(4)   | 21(3)   | 33(5)   | 12(3)  | 12(3)   | 3(3)   |
| N(6)   | 31(4)   | 25(4)   | 59(6)   | -1(3)  | 34(4)   | -3(3)  |
| N(7)   | 36(4)   | 18(3)   | 33(5)   | -4(3)  | 12(4)   | -4(3)  |
| N(8)   | 22(3)   | 18(3)   | 38(5)   | -2(3)  | 14(3)   | -1(3)  |
| C(1)   | 19(4)   | 22(4)   | 38(6)   | 1(4)   | 9(4)    | 0(3)   |
| C(2)   | 27(4)   | 25(4)   | 31(6)   | -3(4)  | 11(4)   | -7(4)  |
| C(3)   | 36(5)   | 45(6)   | 51(7)   | -5(5)  | 23(5)   | -13(5) |
| C(4)   | 192(15) | 57(7)   | 104(12) | -22(7) | 112(11) | -59(9) |
| C(5)   | 86(8)   | 79(8)   | 47(8)   | 4(6)   | 28(7)   | -41(7) |
| C(6)   | 58(7)   | 114(10) | 131(13) | 63(9)  | 65(8)   | 10(7)  |
| C(7)   | 22(4)   | 32(5)   | 51(7)   | -2(4)  | 14(4)   | -8(4)  |
| C(8)   | 33(4)   | 57(5)   | 93(7)   | 27(5)  | 12(4)   | -19(4) |
| C(9)   | 33(4)   | 57(5)   | 93(7)   | 27(5)  | 12(4)   | -19(4) |
| C(10)  | 44(6)   | 82(8)   | 63(8)   | -5(6)  | 33(6)   | -15(6) |
| C(11)  | 22(4)   | 33(5)   | 35(6)   | -3(4)  | 9(4)    | -6(4)  |
| C(12)  | 21(4)   | 23(4)   | 33(5)   | 7(4)   | 9(4)    | 9(4)   |
| C(13)  | 43(5)   | 27(5)   | 49(7)   | -11(4) | 27(5)   | -5(4)  |
| C(14)  | 73(8)   | 50(7)   | 126(12) | -49(7) | 63(8)   | -34(6) |
| C(15)  | 78(8)   | 29(5)   | 99(11)  | -12(6) | 34(8)   | -28(6) |
| C(16)  | 34(6)   | 62(7)   | 86(10)  | -39(7) | 9(6)    | -16(5) |
| C(17)  | 20(4)   | 33(5)   | 56(7)   | -7(5)  | 19(5)   | -14(4) |

|       |         |         |         |        |        |        |
|-------|---------|---------|---------|--------|--------|--------|
| C(18) | 68(8)   | 75(8)   | 141(13) | -37(8) | 79(9)  | -41(7) |
| C(19) | 71(8)   | 101(10) | 73(10)  | -4(8)  | -6(7)  | -62(7) |
| C(20) | 41(7)   | 53(7)   | 178(15) | -18(8) | 21(8)  | -22(6) |
| C(21) | 25(4)   | 38(5)   | 44(6)   | 8(4)   | 19(4)  | 4(4)   |
| C(22) | 23(4)   | 29(4)   | 35(5)   | -10(4) | 14(4)  | -13(4) |
| C(23) | 32(5)   | 40(5)   | 49(7)   | 21(5)  | 20(5)  | 19(4)  |
| C(24) | 152(13) | 71(8)   | 44(9)   | 37(7)  | 32(8)  | 53(9)  |
| C(25) | 78(9)   | 63(8)   | 219(19) | 54(10) | 82(11) | 15(7)  |
| C(26) | 89(9)   | 51(6)   | 84(10)  | 21(6)  | 53(8)  | 31(6)  |
| C(27) | 37(5)   | 46(6)   | 59(8)   | 23(5)  | 25(5)  | 7(5)   |
| C(28) | 99(9)   | 77(8)   | 94(10)  | 46(7)  | 77(9)  | 33(7)  |
| C(29) | 97(9)   | 72(8)   | 74(10)  | 23(7)  | 52(8)  | -7(7)  |
| C(30) | 78(9)   | 80(8)   | 87(11)  | 31(7)  | 48(8)  | 11(7)  |
| C(31) | 36(5)   | 28(5)   | 46(6)   | 9(4)   | 26(5)  | 6(4)   |
| C(32) | 30(5)   | 17(4)   | 35(6)   | 12(4)  | 12(4)  | 12(4)  |
| C(33) | 39(5)   | 35(5)   | 39(6)   | -2(5)  | 11(5)  | 4(4)   |
| C(34) | 93(9)   | 43(6)   | 65(9)   | 16(6)  | 2(7)   | 28(6)  |
| C(35) | 67(7)   | 44(6)   | 87(10)  | -2(6)  | 46(7)  | 11(6)  |
| C(36) | 60(7)   | 29(5)   | 118(11) | 18(6)  | 42(7)  | 11(5)  |
| C(37) | 38(5)   | 21(4)   | 31(6)   | -11(4) | 7(4)   | -1(4)  |
| C(38) | 86(8)   | 35(6)   | 69(9)   | -8(6)  | 22(7)  | 0(6)   |
| C(39) | 118(10) | 28(5)   | 82(10)  | 1(6)   | 67(8)  | -8(6)  |
| C(40) | 63(7)   | 34(5)   | 67(8)   | -21(5) | 29(6)  | 14(5)  |

Table 5. Hydrogen coordinates ( $\times 10^4$ ) and isotropic displacement parameters ( $\text{\AA}^2 \times 10^3$ ) for **4**.

|       | x    | y     | z    | U(eq) |
|-------|------|-------|------|-------|
| H(4A) | 2687 | -2018 | 3820 | 151   |
| H(4B) | 2627 | -2567 | 4460 | 151   |
| H(4C) | 3287 | -2457 | 4440 | 151   |
| H(5A) | 3062 | -1416 | 5534 | 106   |
| H(5B) | 3382 | -122  | 5562 | 106   |
| H(5C) | 3702 | -1343 | 5464 | 106   |
| H(6A) | 2129 | 16    | 4001 | 139   |
| H(6B) | 2385 | 469   | 4753 | 139   |
| H(6C) | 2070 | -844  | 4555 | 139   |
| H(8A) | 4806 | 3073  | 4905 | 98    |



|        |      |       |      |     |
|--------|------|-------|------|-----|
| H(8B)  | 5298 | 3076  | 4587 | 98  |
| H(8C)  | 5161 | 1844  | 4888 | 98  |
| H(9A)  | 3846 | 3272  | 3158 | 98  |
| H(9B)  | 4515 | 3874  | 3479 | 98  |
| H(9C)  | 4062 | 3995  | 3844 | 98  |
| H(10A) | 4884 | 710   | 3782 | 89  |
| H(10B) | 5087 | 1933  | 3533 | 89  |
| H(10C) | 4428 | 1347  | 3111 | 89  |
| H(14A) | 1322 | 4968  | 3702 | 114 |
| H(14B) | 1969 | 5630  | 4085 | 114 |
| H(14C) | 1855 | 4299  | 4308 | 114 |
| H(15A) | 2039 | 4852  | 2558 | 104 |
| H(15B) | 2014 | 5968  | 3011 | 104 |
| H(15C) | 1406 | 5202  | 2601 | 104 |
| H(16A) | 2823 | 3610  | 4198 | 99  |
| H(16B) | 2906 | 4941  | 3950 | 99  |
| H(16C) | 2880 | 3771  | 3508 | 99  |
| H(18A) | 358  | 298   | 3422 | 124 |
| H(18B) | -136 | -475  | 2830 | 124 |
| H(18C) | -112 | 977   | 2772 | 124 |
| H(19A) | 55   | 1044  | 1754 | 140 |
| H(19B) | -74  | -392  | 1696 | 140 |
| H(19C) | 532  | 134   | 1651 | 140 |
| H(20A) | 1086 | -1354 | 2476 | 147 |
| H(20B) | 552  | -1785 | 2688 | 147 |
| H(20C) | 1176 | -1231 | 3229 | 147 |
| H(24A) | 4487 | -2080 | 3467 | 138 |
| H(24B) | 4135 | -3194 | 3624 | 138 |
| H(24C) | 3845 | -1855 | 3516 | 138 |
| H(25A) | 3228 | -4121 | 2762 | 169 |
| H(25B) | 2926 | -3545 | 2036 | 169 |
| H(25C) | 2875 | -2843 | 2644 | 169 |
| H(26A) | 4526 | -3131 | 2488 | 104 |
| H(26B) | 3920 | -3775 | 1966 | 104 |
| H(26C) | 4240 | -4281 | 2707 | 104 |
| H(28A) | 4476 | 1006  | 1168 | 116 |
| H(28B) | 4040 | 1762  | 530  | 116 |
| H(28C) | 3908 | 348   | 596  | 116 |
| H(29A) | 3643 | 2905  | 1826 | 113 |
| H(29B) | 3952 | 3280  | 1335 | 113 |
| H(29C) | 4321 | 2444  | 1965 | 113 |
| H(30A) | 2806 | 991   | 431  | 115 |
| H(30B) | 2993 | 2380  | 391  | 115 |
| H(30C) | 2731 | 1984  | 921  | 115 |

|        |      |       |      |     |
|--------|------|-------|------|-----|
| H(34A) | 1054 | 3543  | -245 | 116 |
| H(34B) | 757  | 4634  | 3    | 116 |
| H(34C) | 439  | 3319  | -139 | 116 |
| H(35A) | 785  | 4570  | 1163 | 92  |
| H(35B) | 1068 | 3398  | 1616 | 92  |
| H(35C) | 444  | 3281  | 964  | 92  |
| H(36A) | 2077 | 3886  | 772  | 101 |
| H(36B) | 2059 | 3986  | 1483 | 101 |
| H(36C) | 1733 | 5006  | 935  | 101 |
| H(38A) | 474  | -1623 | -169 | 100 |
| H(38B) | 885  | -2755 | -197 | 100 |
| H(38C) | 1019 | -1423 | -402 | 100 |
| H(39A) | 725  | -1947 | 1059 | 102 |
| H(39B) | 1420 | -2249 | 1546 | 102 |
| H(39C) | 1041 | -3174 | 962  | 102 |
| H(40A) | 1992 | -2910 | 636  | 81  |
| H(40B) | 2281 | -1843 | 1166 | 81  |
| H(40C) | 2106 | -1591 | 399  | 81  |

---

Table 6. Torsion angles [deg] for **4**.

---

|                       |           |
|-----------------------|-----------|
| N(1)-Bi(1)-Bi(2)-N(3) | 103.7(2)  |
| N(5)-Bi(1)-Bi(2)-N(3) | -167.4(2) |
| N(4)-Bi(1)-Bi(2)-N(3) | 12.6(2)   |
| N(8)-Bi(1)-Bi(2)-N(3) | -75.2(2)  |
| N(1)-Bi(1)-Bi(2)-N(6) | -75.7(2)  |
| N(5)-Bi(1)-Bi(2)-N(6) | 13.2(2)   |
| N(4)-Bi(1)-Bi(2)-N(6) | -166.8(2) |
| N(8)-Bi(1)-Bi(2)-N(6) | 105.5(2)  |
| N(1)-Bi(1)-Bi(2)-N(7) | -166.3(2) |
| N(5)-Bi(1)-Bi(2)-N(7) | -77.4(2)  |
| N(4)-Bi(1)-Bi(2)-N(7) | 102.6(2)  |
| N(8)-Bi(1)-Bi(2)-N(7) | 14.9(2)   |
| N(1)-Bi(1)-Bi(2)-N(2) | 14.6(2)   |
| N(5)-Bi(1)-Bi(2)-N(2) | 103.5(2)  |
| N(4)-Bi(1)-Bi(2)-N(2) | -76.5(2)  |
| N(8)-Bi(1)-Bi(2)-N(2) | -164.3(2) |
| N(5)-Bi(1)-N(1)-C(1)  | 101.4(9)  |
| N(4)-Bi(1)-N(1)-C(1)  | -113.6(9) |
| N(8)-Bi(1)-N(1)-C(1)  | 176.3(7)  |
| Bi(2)-Bi(1)-N(1)-C(1) | 174.4(9)  |

|                        |           |
|------------------------|-----------|
| N(5)-Bi(1)-N(1)-N(2)   | -99.7(5)  |
| N(4)-Bi(1)-N(1)-N(2)   | 45.3(4)   |
| N(8)-Bi(1)-N(1)-N(2)   | -24.8(6)  |
| Bi(2)-Bi(1)-N(1)-N(2)  | -26.7(4)  |
| C(1)-N(1)-N(2)-C(2)    | 1.7(9)    |
| Bi(1)-N(1)-N(2)-C(2)   | -164.3(5) |
| C(1)-N(1)-N(2)-Bi(2)   | -164.8(5) |
| Bi(1)-N(1)-N(2)-Bi(2)  | 29.2(4)   |
| N(3)-Bi(2)-N(2)-C(2)   | 100.2(8)  |
| N(6)-Bi(2)-N(2)-C(2)   | -113.9(8) |
| N(7)-Bi(2)-N(2)-C(2)   | 172.4(7)  |
| Bi(1)-Bi(2)-N(2)-C(2)  | 173.8(8)  |
| N(3)-Bi(2)-N(2)-N(1)   | -99.9(4)  |
| N(6)-Bi(2)-N(2)-N(1)   | 46.1(4)   |
| N(7)-Bi(2)-N(2)-N(1)   | -27.6(6)  |
| Bi(1)-Bi(2)-N(2)-N(1)  | -26.2(4)  |
| N(6)-Bi(2)-N(3)-C(11)  | 176.6(7)  |
| N(7)-Bi(2)-N(3)-C(11)  | 103.2(8)  |
| N(2)-Bi(2)-N(3)-C(11)  | -111.8(9) |
| Bi(1)-Bi(2)-N(3)-C(11) | 175.6(9)  |
| N(6)-Bi(2)-N(3)-N(4)   | -21.8(7)  |
| N(7)-Bi(2)-N(3)-N(4)   | -95.2(5)  |
| N(2)-Bi(2)-N(3)-N(4)   | 49.8(5)   |
| Bi(1)-Bi(2)-N(3)-N(4)  | -22.8(4)  |
| C(11)-N(3)-N(4)-C(12)  | 2.4(10)   |
| Bi(2)-N(3)-N(4)-C(12)  | -164.7(5) |
| C(11)-N(3)-N(4)-Bi(1)  | -167.4(5) |
| Bi(2)-N(3)-N(4)-Bi(1)  | 25.5(4)   |
| N(1)-Bi(1)-N(4)-C(12)  | 100.3(9)  |
| N(5)-Bi(1)-N(4)-C(12)  | 172.6(8)  |
| N(8)-Bi(1)-N(4)-C(12)  | -113.9(9) |
| Bi(2)-Bi(1)-N(4)-C(12) | 172.7(10) |
| N(1)-Bi(1)-N(4)-N(3)   | -95.1(5)  |
| N(5)-Bi(1)-N(4)-N(3)   | -22.8(7)  |
| N(8)-Bi(1)-N(4)-N(3)   | 50.7(5)   |
| Bi(2)-Bi(1)-N(4)-N(3)  | -22.7(4)  |
| N(1)-Bi(1)-N(5)-C(21)  | -115.6(9) |
| N(4)-Bi(1)-N(5)-C(21)  | 171.5(8)  |
| N(8)-Bi(1)-N(5)-C(21)  | 99.3(9)   |
| Bi(2)-Bi(1)-N(5)-C(21) | 171.4(9)  |
| N(1)-Bi(1)-N(5)-N(6)   | 48.9(5)   |
| N(4)-Bi(1)-N(5)-N(6)   | -23.9(7)  |
| N(8)-Bi(1)-N(5)-N(6)   | -96.1(5)  |
| Bi(2)-Bi(1)-N(5)-N(6)  | -24.0(4)  |

|                            |            |
|----------------------------|------------|
| C (21)–N (5)–N (6)–C (22)  | 2.5 (10)   |
| Bi (1)–N (5)–N (6)–C (22)  | –166.8 (5) |
| C (21)–N (5)–N (6)–Bi (2)  | –163.8 (6) |
| Bi (1)–N (5)–N (6)–Bi (2)  | 26.9 (4)   |
| N (3)–Bi (2)–N (6)–C (22)  | 174.9 (8)  |
| N (7)–Bi (2)–N (6)–C (22)  | –111.8 (9) |
| N (2)–Bi (2)–N (6)–C (22)  | 103.5 (9)  |
| Bi (1)–Bi (2)–N (6)–C (22) | 175.9 (9)  |
| N (3)–Bi (2)–N (6)–N (5)   | –25.3 (7)  |
| N (7)–Bi (2)–N (6)–N (5)   | 48.1 (5)   |
| N (2)–Bi (2)–N (6)–N (5)   | –96.7 (5)  |
| Bi (1)–Bi (2)–N (6)–N (5)  | –24.3 (4)  |
| N (3)–Bi (2)–N (7)–C (31)  | –111.3 (8) |
| N (6)–Bi (2)–N (7)–C (31)  | 103.1 (8)  |
| N (2)–Bi (2)–N (7)–C (31)  | 176.7 (7)  |
| Bi (1)–Bi (2)–N (7)–C (31) | 175.3 (9)  |
| N (3)–Bi (2)–N (7)–N (8)   | 46.3 (4)   |
| N (6)–Bi (2)–N (7)–N (8)   | –99.3 (4)  |
| N (2)–Bi (2)–N (7)–N (8)   | –25.6 (6)  |
| Bi (1)–Bi (2)–N (7)–N (8)  | –27.1 (4)  |
| C (31)–N (7)–N (8)–C (32)  | 0.6 (9)    |
| Bi (2)–N (7)–N (8)–C (32)  | –164.3 (5) |
| C (31)–N (7)–N (8)–Bi (1)  | –165.4 (5) |
| Bi (2)–N (7)–N (8)–Bi (1)  | 29.6 (4)   |
| N (1)–Bi (1)–N (8)–C (32)  | 172.2 (7)  |
| N (5)–Bi (1)–N (8)–C (32)  | –113.9 (8) |
| N (4)–Bi (1)–N (8)–C (32)  | 101.2 (8)  |
| Bi (2)–Bi (1)–N (8)–C (32) | 174.1 (8)  |
| N (1)–Bi (1)–N (8)–N (7)   | –28.6 (6)  |
| N (5)–Bi (1)–N (8)–N (7)   | 45.3 (4)   |
| N (4)–Bi (1)–N (8)–N (7)   | –99.6 (4)  |
| Bi (2)–Bi (1)–N (8)–N (7)  | –26.8 (4)  |
| N (2)–N (1)–C (1)–C (7)    | 173.5 (6)  |
| Bi (1)–N (1)–C (1)–C (7)   | –28.6 (13) |
| N (2)–N (1)–C (1)–P (1)    | –1.0 (8)   |
| Bi (1)–N (1)–C (1)–P (1)   | 156.9 (5)  |
| C (2)–P (1)–C (1)–N (1)    | 0.1 (6)    |
| C (2)–P (1)–C (1)–C (7)    | –174.2 (7) |
| N (1)–N (2)–C (2)–C (3)    | 177.7 (7)  |
| Bi (2)–N (2)–C (2)–C (3)   | –23.7 (12) |
| N (1)–N (2)–C (2)–P (1)    | –1.6 (9)   |
| Bi (2)–N (2)–C (2)–P (1)   | 156.9 (5)  |
| C (1)–P (1)–C (2)–N (2)    | 0.9 (6)    |
| C (1)–P (1)–C (2)–C (3)    | –178.4 (7) |

|                        |            |
|------------------------|------------|
| N(2)-C(2)-C(3)-C(4)    | 64.9(12)   |
| P(1)-C(2)-C(3)-C(4)    | -115.8(10) |
| N(2)-C(2)-C(3)-C(6)    | -58.5(11)  |
| P(1)-C(2)-C(3)-C(6)    | 120.7(9)   |
| N(2)-C(2)-C(3)-C(5)    | -175.2(8)  |
| P(1)-C(2)-C(3)-C(5)    | 4.0(11)    |
| N(1)-C(1)-C(7)-C(9)    | 51.0(11)   |
| P(1)-C(1)-C(7)-C(9)    | -135.1(8)  |
| N(1)-C(1)-C(7)-C(10)   | -68.7(10)  |
| P(1)-C(1)-C(7)-C(10)   | 105.2(8)   |
| N(1)-C(1)-C(7)-C(8)    | 172.8(7)   |
| P(1)-C(1)-C(7)-C(8)    | -13.3(10)  |
| N(4)-N(3)-C(11)-C(17)  | 172.7(7)   |
| Bi(2)-N(3)-C(11)-C(17) | -26.9(13)  |
| N(4)-N(3)-C(11)-P(2)   | -3.9(9)    |
| Bi(2)-N(3)-C(11)-P(2)  | 156.5(5)   |
| C(12)-P(2)-C(11)-N(3)  | 3.3(6)     |
| C(12)-P(2)-C(11)-C(17) | -173.2(8)  |
| N(3)-N(4)-C(12)-C(13)  | 177.3(7)   |
| Bi(1)-N(4)-C(12)-C(13) | -18.9(14)  |
| N(3)-N(4)-C(12)-P(2)   | 0.3(9)     |
| Bi(1)-N(4)-C(12)-P(2)  | 164.1(6)   |
| C(11)-P(2)-C(12)-N(4)  | -2.0(7)    |
| C(11)-P(2)-C(12)-C(13) | -178.9(8)  |
| N(4)-C(12)-C(13)-C(14) | -161.0(9)  |
| P(2)-C(12)-C(13)-C(14) | 15.7(11)   |
| N(4)-C(12)-C(13)-C(15) | 80.6(10)   |
| P(2)-C(12)-C(13)-C(15) | -102.8(8)  |
| N(4)-C(12)-C(13)-C(16) | -39.7(11)  |
| P(2)-C(12)-C(13)-C(16) | 136.9(7)   |
| N(3)-C(11)-C(17)-C(18) | 168.2(8)   |
| P(2)-C(11)-C(17)-C(18) | -15.6(12)  |
| N(3)-C(11)-C(17)-C(20) | 45.2(13)   |
| P(2)-C(11)-C(17)-C(20) | -138.6(8)  |
| N(3)-C(11)-C(17)-C(19) | -73.5(10)  |
| P(2)-C(11)-C(17)-C(19) | 102.7(9)   |
| N(6)-N(5)-C(21)-C(27)  | 174.7(8)   |
| Bi(1)-N(5)-C(21)-C(27) | -21.7(14)  |
| N(6)-N(5)-C(21)-P(3)   | -3.0(9)    |
| Bi(1)-N(5)-C(21)-P(3)  | 160.5(5)   |
| C(22)-P(3)-C(21)-N(5)  | 2.0(7)     |
| C(22)-P(3)-C(21)-C(27) | -175.6(9)  |
| N(5)-N(6)-C(22)-C(23)  | 173.4(7)   |
| Bi(2)-N(6)-C(22)-C(23) | -27.8(14)  |

|                        |           |
|------------------------|-----------|
| N(5)-N(6)-C(22)-P(3)   | -0.9(9)   |
| Bi(2)-N(6)-C(22)-P(3)  | 157.9(6)  |
| C(21)-P(3)-C(22)-N(6)  | -0.6(7)   |
| C(21)-P(3)-C(22)-C(23) | -174.8(8) |
| N(6)-C(22)-C(23)-C(24) | -66.1(11) |
| P(3)-C(22)-C(23)-C(24) | 107.5(8)  |
| N(6)-C(22)-C(23)-C(25) | 55.0(12)  |
| P(3)-C(22)-C(23)-C(25) | -131.4(8) |
| N(6)-C(22)-C(23)-C(26) | 174.3(8)  |
| P(3)-C(22)-C(23)-C(26) | -12.0(12) |
| N(5)-C(21)-C(27)-C(30) | -54.7(12) |
| P(3)-C(21)-C(27)-C(30) | 122.8(8)  |
| N(5)-C(21)-C(27)-C(28) | -175.9(9) |
| P(3)-C(21)-C(27)-C(28) | 1.6(13)   |
| N(5)-C(21)-C(27)-C(29) | 65.3(11)  |
| P(3)-C(21)-C(27)-C(29) | -117.3(8) |
| N(8)-N(7)-C(31)-C(37)  | 176.0(6)  |
| Bi(2)-N(7)-C(31)-C(37) | -27.6(12) |
| N(8)-N(7)-C(31)-P(4)   | -0.2(8)   |
| Bi(2)-N(7)-C(31)-P(4)  | 156.2(5)  |
| C(32)-P(4)-C(31)-N(7)  | -0.2(6)   |
| C(32)-P(4)-C(31)-C(37) | -176.3(7) |
| N(7)-N(8)-C(32)-C(33)  | 175.2(6)  |
| Bi(1)-N(8)-C(32)-C(33) | -27.0(12) |
| N(7)-N(8)-C(32)-P(4)   | -0.8(8)   |
| Bi(1)-N(8)-C(32)-P(4)  | 157.0(5)  |
| C(31)-P(4)-C(32)-N(8)  | 0.5(6)    |
| C(31)-P(4)-C(32)-C(33) | -175.2(7) |
| N(8)-C(32)-C(33)-C(34) | 170.0(7)  |
| P(4)-C(32)-C(33)-C(34) | -14.6(11) |
| N(8)-C(32)-C(33)-C(35) | -72.4(10) |
| P(4)-C(32)-C(33)-C(35) | 103.0(8)  |
| N(8)-C(32)-C(33)-C(36) | 49.0(11)  |
| P(4)-C(32)-C(33)-C(36) | -135.6(7) |
| N(7)-C(31)-C(37)-C(38) | -175.8(7) |
| P(4)-C(31)-C(37)-C(38) | 0.0(10)   |
| N(7)-C(31)-C(37)-C(40) | -57.8(10) |
| P(4)-C(31)-C(37)-C(40) | 118.0(7)  |
| N(7)-C(31)-C(37)-C(39) | 64.5(10)  |
| P(4)-C(31)-C(37)-C(39) | -119.8(8) |

---

Symmetry transformations used to generate equivalent atoms:

a) Crystal structural analysis data for **5**

Table 1. Crystal data and structure refinement for **5**.

|                                 |                                                                                                                                              |
|---------------------------------|----------------------------------------------------------------------------------------------------------------------------------------------|
| Identification code             | 150209-1                                                                                                                                     |
| Empirical formula               | $C_{32}H_{56}Bi_2N_8P_4$                                                                                                                     |
| Formula weight                  | 1094.69                                                                                                                                      |
| Temperature                     | 298(2) K                                                                                                                                     |
| Wavelength                      | 0.71073 Å                                                                                                                                    |
| Crystal system, space group     | Triclinic, $P-1$                                                                                                                             |
| Unit cell dimensions            | $a = 10.5121(2)$ Å $\alpha = 90.269(2)$ deg.<br>$b = 13.7719(3)$ Å $\beta = 101.428(2)$ deg.<br>$c = 15.2443(3)$ Å $\gamma = 93.926(2)$ deg. |
| Volume                          | 2157.73(8) Å <sup>3</sup>                                                                                                                    |
| $Z$ , Calculated density        | 2, 1.685 Mg/m <sup>3</sup>                                                                                                                   |
| Absorption coefficient          | 8.324 mm <sup>-1</sup>                                                                                                                       |
| $F(000)$                        | 1060                                                                                                                                         |
| Crystal size                    | 0.26 × 0.15 × 0.10 mm                                                                                                                        |
| Theta range for data collection | 2.93 to 26.37 deg.                                                                                                                           |
| Limiting indices                | $-13 \leq h \leq 13$ , $-17 \leq k \leq 17$ , $-17 \leq l \leq 19$                                                                           |
| Reflections collected / unique  | 26642 / 8798 [ $R(\text{int}) = 0.0404$ ]                                                                                                    |
| Completeness to theta = 26.37   | 99.8 %                                                                                                                                       |
| Absorption correction           | Semi-empirical from equivalents                                                                                                              |

|                                        |                                        |
|----------------------------------------|----------------------------------------|
| Max. and min. transmission             | 1.00000 and 0.24037                    |
| Refinement method                      | Full-matrix least-squares on $F^2$     |
| Data / restraints / parameters         | 8798 / 6 / 425                         |
| Goodness-of-fit on $F^2$               | 1.035                                  |
| Final $R$ indices [ $I > 2\sigma(I)$ ] | $R_1 = 0.0345$ , $wR_2 = 0.0671$       |
| $R$ indices (all data)                 | $R_1 = 0.0603$ , $wR_2 = 0.0765$       |
| Largest diff. peak and hole            | 1.457 and $-0.798 \text{ e. \AA}^{-3}$ |



Table 2. Atomic coordinates ( $\times 10^4$ ) and equivalent isotropic displacement parameters ( $\text{\AA}^2 \times 10^3$ ) for **5**.

U(eq) is defined as one third of the trace of the orthogonalized Uij tensor.

|        | x         | y         | z         | U(eq)   |
|--------|-----------|-----------|-----------|---------|
| Bi (1) | 4473 (1)  | 9392 (1)  | 4232 (1)  | 36 (1)  |
| Bi (2) | 5327 (1)  | 4149 (1)  | 506 (1)   | 39 (1)  |
| C (1)  | 3425 (10) | 8974 (7)  | 8470 (5)  | 110 (3) |
| C (2)  | 4249 (8)  | 9298 (5)  | 7810 (4)  | 59 (2)  |
| C (3)  | 5668 (9)  | 9184 (7)  | 8175 (5)  | 110 (3) |
| C (4)  | 3803 (7)  | 8772 (4)  | 6915 (4)  | 45 (2)  |
| C (5)  | 3040 (6)  | 7795 (4)  | 5576 (4)  | 43 (2)  |
| C (6)  | 2502 (7)  | 7130 (4)  | 4793 (4)  | 47 (2)  |
| C (7)  | 1980 (10) | 6158 (5)  | 5067 (5)  | 99 (3)  |
| C (8)  | 1456 (7)  | 7583 (5)  | 4140 (4)  | 63 (2)  |
| C (9)  | 7266 (9)  | 6380 (5)  | 4069 (5)  | 82 (3)  |
| C (10) | 6630 (7)  | 7322 (4)  | 3991 (4)  | 50 (2)  |
| C (11) | 6812 (9)  | 7795 (5)  | 3104 (4)  | 86 (3)  |
| C (12) | 7160 (6)  | 8010 (4)  | 4763 (4)  | 39 (1)  |
| C (13) | 8235 (6)  | 9049 (4)  | 6003 (4)  | 42 (1)  |
| C (14) | 9054 (7)  | 9631 (5)  | 6770 (4)  | 59 (2)  |
| C (15) | 10304 (8) | 10056 (6) | 6516 (5)  | 81 (2)  |
| C (16) | 9369 (9)  | 9022 (6)  | 7600 (5)  | 98 (3)  |
| C (17) | 2424 (12) | 8139 (6)  | 1706 (7)  | 136 (3) |
| C (18) | 2961 (9)  | 7533 (5)  | 1042 (5)  | 77 (2)  |
| C (19) | 4063 (12) | 8132 (6)  | 810 (7)   | 136 (3) |
| C (20) | 3415 (7)  | 6580 (4)  | 1456 (4)  | 49 (2)  |
| C (21) | 3999 (6)  | 5122 (4)  | 2226 (4)  | 45 (2)  |
| C (22) | 4278 (7)  | 4218 (5)  | 2775 (4)  | 60 (2)  |
| C (23) | 3341 (9)  | 3377 (5)  | 2425 (5)  | 92 (3)  |
| C (24) | 4262 (10) | 4406 (6)  | 3748 (5)  | 99 (3)  |
| C (25) | 2274 (11) | 1395 (5)  | -918 (6)  | 113 (3) |
| C (26) | 2294 (10) | 2178 (5)  | -244 (5)  | 87 (3)  |
| C (27) | 1215 (10) | 1944 (7)  | 255 (6)   | 126 (4) |
| C (28) | 2148 (7)  | 3152 (4)  | -692 (4)  | 49 (2)  |
| C (29) | 1717 (7)  | 4637 (4)  | -1466 (4) | 50 (2)  |
| C (30) | 1275 (8)  | 5544 (5)  | -1963 (5) | 68 (2)  |
| C (31) | 412 (9)   | 5316 (6)  | -2856 (5) | 84 (3)  |

|       |         |         |          |        |
|-------|---------|---------|----------|--------|
| C(32) | 590(14) | 6160(8) | -1407(7) | 170(6) |
| N(1)  | 4173(5) | 9178(3) | 6209(3)  | 43(1)  |
| N(2)  | 6496(5) | 8767(3) | 4876(3)  | 38(1)  |
| N(3)  | 3730(5) | 8610(3) | 5444(3)  | 39(1)  |
| N(4)  | 7115(5) | 9364(3) | 5591(3)  | 42(1)  |
| N(5)  | 2845(5) | 4684(3) | -906(3)  | 45(1)  |
| N(6)  | 4296(5) | 5145(3) | 1420(3)  | 40(1)  |
| N(7)  | 3103(5) | 3836(3) | -467(3)  | 43(1)  |
| N(8)  | 3955(5) | 5986(3) | 967(3)   | 45(1)  |
| P(1)  | 3263(2) | 6139(1) | 2497(1)  | 62(1)  |
| P(2)  | 855(2)  | 3512(2) | -1490(2) | 76(1)  |
| P(3)  | 2869(2) | 7671(1) | 6686(1)  | 57(1)  |
| P(4)  | 8617(2) | 7963(1) | 5537(1)  | 58(1)  |

---

Table 3. Bond lengths [Å] and angles [deg] for **5**.

---

|               |           |
|---------------|-----------|
| Bi(1)-N(2)    | 2.378(5)  |
| Bi(1)-N(3)    | 2.379(4)  |
| Bi(1)-N(4)#1  | 2.522(5)  |
| Bi(1)-N(1)#1  | 2.523(5)  |
| Bi(1)-Bi(1)#1 | 2.8630(4) |
| Bi(2)-N(5)#2  | 2.398(5)  |
| Bi(2)-N(6)    | 2.405(4)  |
| Bi(2)-N(8)#2  | 2.516(5)  |
| Bi(2)-N(7)    | 2.517(5)  |
| Bi(2)-Bi(2)#2 | 2.8611(4) |
| C(1)-C(2)     | 1.503(10) |
| C(1)-H(1A)    | 0.9600    |
| C(1)-H(1B)    | 0.9600    |
| C(1)-H(1C)    | 0.9600    |
| C(2)-C(3)     | 1.504(10) |
| C(2)-C(4)     | 1.517(8)  |
| C(2)-H(2)     | 0.9800    |
| C(3)-H(3A)    | 0.9600    |
| C(3)-H(3B)    | 0.9600    |
| C(3)-H(3C)    | 0.9600    |
| C(4)-N(1)     | 1.329(7)  |
| C(4)-P(3)     | 1.743(6)  |
| C(5)-N(3)     | 1.332(7)  |
| C(5)-C(6)     | 1.495(8)  |
| C(5)-P(3)     | 1.744(6)  |

|              |           |
|--------------|-----------|
| C(6)–C(8)    | 1.502(8)  |
| C(6)–C(7)    | 1.504(9)  |
| C(6)–H(6)    | 0.9800    |
| C(7)–H(7A)   | 0.9600    |
| C(7)–H(7B)   | 0.9600    |
| C(7)–H(7C)   | 0.9600    |
| C(8)–H(8A)   | 0.9600    |
| C(8)–H(8B)   | 0.9600    |
| C(8)–H(8C)   | 0.9600    |
| C(9)–C(10)   | 1.494(8)  |
| C(9)–H(9A)   | 0.9600    |
| C(9)–H(9B)   | 0.9600    |
| C(9)–H(9C)   | 0.9600    |
| C(10)–C(12)  | 1.501(8)  |
| C(10)–C(11)  | 1.543(8)  |
| C(10)–H(10)  | 0.9800    |
| C(11)–H(11A) | 0.9600    |
| C(11)–H(11B) | 0.9600    |
| C(11)–H(11C) | 0.9600    |
| C(12)–N(2)   | 1.323(7)  |
| C(12)–P(4)   | 1.744(6)  |
| C(13)–N(4)   | 1.322(7)  |
| C(13)–C(14)  | 1.500(9)  |
| C(13)–P(4)   | 1.758(6)  |
| C(14)–C(16)  | 1.515(9)  |
| C(14)–C(15)  | 1.523(9)  |
| C(14)–H(14)  | 0.9800    |
| C(15)–H(15A) | 0.9600    |
| C(15)–H(15B) | 0.9600    |
| C(15)–H(15C) | 0.9600    |
| C(16)–H(16A) | 0.9600    |
| C(16)–H(16B) | 0.9600    |
| C(16)–H(16C) | 0.9600    |
| C(17)–C(18)  | 1.524(10) |
| C(17)–H(17A) | 0.9600    |
| C(17)–H(17B) | 0.9600    |
| C(17)–H(17C) | 0.9600    |
| C(18)–C(19)  | 1.476(12) |
| C(18)–C(20)  | 1.524(9)  |
| C(18)–H(18)  | 0.9800    |
| C(19)–H(19A) | 0.9600    |
| C(19)–H(19B) | 0.9600    |
| C(19)–H(19C) | 0.9600    |
| C(20)–N(8)   | 1.331(7)  |

|              |           |
|--------------|-----------|
| C(20)-P(1)   | 1.735(6)  |
| C(21)-N(6)   | 1.328(7)  |
| C(21)-C(22)  | 1.515(8)  |
| C(21)-P(1)   | 1.732(6)  |
| C(22)-C(23)  | 1.492(10) |
| C(22)-C(24)  | 1.509(9)  |
| C(22)-H(22)  | 0.9800    |
| C(23)-H(23A) | 0.9600    |
| C(23)-H(23B) | 0.9600    |
| C(23)-H(23C) | 0.9600    |
| C(24)-H(24A) | 0.9600    |
| C(24)-H(24B) | 0.9600    |
| C(24)-H(24C) | 0.9600    |
| C(25)-C(26)  | 1.481(10) |
| C(25)-H(25A) | 0.9600    |
| C(25)-H(25B) | 0.9600    |
| C(25)-H(25C) | 0.9600    |
| C(26)-C(27)  | 1.504(11) |
| C(26)-C(28)  | 1.511(8)  |
| C(26)-H(26)  | 0.9800    |
| C(27)-H(27A) | 0.9600    |
| C(27)-H(27B) | 0.9600    |
| C(27)-H(27C) | 0.9600    |
| C(28)-N(7)   | 1.320(7)  |
| C(28)-P(2)   | 1.737(7)  |
| C(29)-N(5)   | 1.314(7)  |
| C(29)-C(30)  | 1.516(8)  |
| C(29)-P(2)   | 1.737(6)  |
| C(30)-C(31)  | 1.498(9)  |
| C(30)-C(32)  | 1.508(12) |
| C(30)-H(30)  | 0.9800    |
| C(31)-H(31A) | 0.9600    |
| C(31)-H(31B) | 0.9600    |
| C(31)-H(31C) | 0.9600    |
| C(32)-H(32A) | 0.9600    |
| C(32)-H(32B) | 0.9600    |
| C(32)-H(32C) | 0.9600    |
| N(1)-N(3)    | 1.383(6)  |
| N(1)-Bi(1)#1 | 2.523(5)  |
| N(2)-N(4)    | 1.388(6)  |
| N(4)-Bi(1)#1 | 2.522(5)  |
| N(5)-N(7)    | 1.365(6)  |
| N(5)-Bi(2)#2 | 2.398(5)  |
| N(6)-N(8)    | 1.383(6)  |

|                      |            |
|----------------------|------------|
| N(8)-Bi(2)#2         | 2.516(5)   |
| N(2)-Bi(1)-N(3)      | 84.17(16)  |
| N(2)-Bi(1)-N(4)#1    | 144.82(14) |
| N(3)-Bi(1)-N(4)#1    | 84.59(15)  |
| N(2)-Bi(1)-N(1)#1    | 85.56(16)  |
| N(3)-Bi(1)-N(1)#1    | 144.88(14) |
| N(4)#1-Bi(1)-N(1)#1  | 84.76(16)  |
| N(2)-Bi(1)-Bi(1)#1   | 74.37(11)  |
| N(3)-Bi(1)-Bi(1)#1   | 74.82(11)  |
| N(4)#1-Bi(1)-Bi(1)#1 | 70.52(11)  |
| N(1)#1-Bi(1)-Bi(1)#1 | 70.07(10)  |
| N(5)#2-Bi(2)-N(6)    | 85.01(17)  |
| N(5)#2-Bi(2)-N(8)#2  | 85.22(17)  |
| N(6)-Bi(2)-N(8)#2    | 145.04(14) |
| N(5)#2-Bi(2)-N(7)    | 144.52(14) |
| N(6)-Bi(2)-N(7)      | 86.16(16)  |
| N(8)#2-Bi(2)-N(7)    | 82.63(16)  |
| N(5)#2-Bi(2)-Bi(2)#2 | 73.47(11)  |
| N(6)-Bi(2)-Bi(2)#2   | 73.89(10)  |
| N(8)#2-Bi(2)-Bi(2)#2 | 71.15(11)  |
| N(7)-Bi(2)-Bi(2)#2   | 71.06(10)  |
| C(2)-C(1)-H(1A)      | 109.5      |
| C(2)-C(1)-H(1B)      | 109.5      |
| H(1A)-C(1)-H(1B)     | 109.5      |
| C(2)-C(1)-H(1C)      | 109.5      |
| H(1A)-C(1)-H(1C)     | 109.5      |
| H(1B)-C(1)-H(1C)     | 109.5      |
| C(1)-C(2)-C(3)       | 111.5(7)   |
| C(1)-C(2)-C(4)       | 111.6(7)   |
| C(3)-C(2)-C(4)       | 111.0(6)   |
| C(1)-C(2)-H(2)       | 107.5      |
| C(3)-C(2)-H(2)       | 107.5      |
| C(4)-C(2)-H(2)       | 107.5      |
| C(2)-C(3)-H(3A)      | 109.5      |
| C(2)-C(3)-H(3B)      | 109.5      |
| H(3A)-C(3)-H(3B)     | 109.5      |
| C(2)-C(3)-H(3C)      | 109.5      |
| H(3A)-C(3)-H(3C)     | 109.5      |
| H(3B)-C(3)-H(3C)     | 109.5      |
| N(1)-C(4)-C(2)       | 117.3(5)   |
| N(1)-C(4)-P(3)       | 114.6(4)   |
| C(2)-C(4)-P(3)       | 128.1(5)   |
| N(3)-C(5)-C(6)       | 118.7(5)   |

|                     |          |
|---------------------|----------|
| N(3)-C(5)-P(3)      | 112.7(4) |
| C(6)-C(5)-P(3)      | 128.5(5) |
| C(5)-C(6)-C(8)      | 111.4(5) |
| C(5)-C(6)-C(7)      | 112.6(5) |
| C(8)-C(6)-C(7)      | 109.4(6) |
| C(5)-C(6)-H(6)      | 107.8    |
| C(8)-C(6)-H(6)      | 107.8    |
| C(7)-C(6)-H(6)      | 107.8    |
| C(6)-C(7)-H(7A)     | 109.5    |
| C(6)-C(7)-H(7B)     | 109.5    |
| H(7A)-C(7)-H(7B)    | 109.5    |
| C(6)-C(7)-H(7C)     | 109.5    |
| H(7A)-C(7)-H(7C)    | 109.5    |
| H(7B)-C(7)-H(7C)    | 109.5    |
| C(6)-C(8)-H(8A)     | 109.5    |
| C(6)-C(8)-H(8B)     | 109.5    |
| H(8A)-C(8)-H(8B)    | 109.5    |
| C(6)-C(8)-H(8C)     | 109.5    |
| H(8A)-C(8)-H(8C)    | 109.5    |
| H(8B)-C(8)-H(8C)    | 109.5    |
| C(10)-C(9)-H(9A)    | 109.5    |
| C(10)-C(9)-H(9B)    | 109.5    |
| H(9A)-C(9)-H(9B)    | 109.5    |
| C(10)-C(9)-H(9C)    | 109.5    |
| H(9A)-C(9)-H(9C)    | 109.5    |
| H(9B)-C(9)-H(9C)    | 109.5    |
| C(9)-C(10)-C(12)    | 112.9(6) |
| C(9)-C(10)-C(11)    | 108.3(6) |
| C(12)-C(10)-C(11)   | 110.2(5) |
| C(9)-C(10)-H(10)    | 108.5    |
| C(12)-C(10)-H(10)   | 108.5    |
| C(11)-C(10)-H(10)   | 108.5    |
| C(10)-C(11)-H(11A)  | 109.5    |
| C(10)-C(11)-H(11B)  | 109.5    |
| H(11A)-C(11)-H(11B) | 109.5    |
| C(10)-C(11)-H(11C)  | 109.5    |
| H(11A)-C(11)-H(11C) | 109.5    |
| H(11B)-C(11)-H(11C) | 109.5    |
| N(2)-C(12)-C(10)    | 118.4(6) |
| N(2)-C(12)-P(4)     | 114.1(4) |
| C(10)-C(12)-P(4)    | 127.5(4) |
| N(4)-C(13)-C(14)    | 119.6(5) |
| N(4)-C(13)-P(4)     | 113.5(4) |
| C(14)-C(13)-P(4)    | 126.8(5) |

|                     |          |
|---------------------|----------|
| C(13)-C(14)-C(16)   | 111.5(6) |
| C(13)-C(14)-C(15)   | 110.5(6) |
| C(16)-C(14)-C(15)   | 110.1(6) |
| C(13)-C(14)-H(14)   | 108.2    |
| C(16)-C(14)-H(14)   | 108.2    |
| C(15)-C(14)-H(14)   | 108.2    |
| C(14)-C(15)-H(15A)  | 109.5    |
| C(14)-C(15)-H(15B)  | 109.5    |
| H(15A)-C(15)-H(15B) | 109.5    |
| C(14)-C(15)-H(15C)  | 109.5    |
| H(15A)-C(15)-H(15C) | 109.5    |
| H(15B)-C(15)-H(15C) | 109.5    |
| C(14)-C(16)-H(16A)  | 109.5    |
| C(14)-C(16)-H(16B)  | 109.5    |
| H(16A)-C(16)-H(16B) | 109.5    |
| C(14)-C(16)-H(16C)  | 109.5    |
| H(16A)-C(16)-H(16C) | 109.5    |
| H(16B)-C(16)-H(16C) | 109.5    |
| C(18)-C(17)-H(17A)  | 109.5    |
| C(18)-C(17)-H(17B)  | 109.5    |
| H(17A)-C(17)-H(17B) | 109.5    |
| C(18)-C(17)-H(17C)  | 109.5    |
| H(17A)-C(17)-H(17C) | 109.5    |
| H(17B)-C(17)-H(17C) | 109.5    |
| C(19)-C(18)-C(17)   | 106.3(7) |
| C(19)-C(18)-C(20)   | 110.6(7) |
| C(17)-C(18)-C(20)   | 110.8(7) |
| C(19)-C(18)-H(18)   | 109.7    |
| C(17)-C(18)-H(18)   | 109.7    |
| C(20)-C(18)-H(18)   | 109.7    |
| C(18)-C(19)-H(19A)  | 109.5    |
| C(18)-C(19)-H(19B)  | 109.5    |
| H(19A)-C(19)-H(19B) | 109.5    |
| C(18)-C(19)-H(19C)  | 109.5    |
| H(19A)-C(19)-H(19C) | 109.5    |
| H(19B)-C(19)-H(19C) | 109.5    |
| N(8)-C(20)-C(18)    | 117.9(6) |
| N(8)-C(20)-P(1)     | 114.6(4) |
| C(18)-C(20)-P(1)    | 127.5(5) |
| N(6)-C(21)-C(22)    | 117.8(5) |
| N(6)-C(21)-P(1)     | 114.1(4) |
| C(22)-C(21)-P(1)    | 128.1(4) |
| C(23)-C(22)-C(24)   | 109.8(6) |
| C(23)-C(22)-C(21)   | 111.8(6) |

|                     |          |
|---------------------|----------|
| C(24)-C(22)-C(21)   | 111.3(6) |
| C(23)-C(22)-H(22)   | 107.9    |
| C(24)-C(22)-H(22)   | 107.9    |
| C(21)-C(22)-H(22)   | 107.9    |
| C(22)-C(23)-H(23A)  | 109.5    |
| C(22)-C(23)-H(23B)  | 109.5    |
| H(23A)-C(23)-H(23B) | 109.5    |
| C(22)-C(23)-H(23C)  | 109.5    |
| H(23A)-C(23)-H(23C) | 109.5    |
| H(23B)-C(23)-H(23C) | 109.5    |
| C(22)-C(24)-H(24A)  | 109.5    |
| C(22)-C(24)-H(24B)  | 109.5    |
| H(24A)-C(24)-H(24B) | 109.5    |
| C(22)-C(24)-H(24C)  | 109.5    |
| H(24A)-C(24)-H(24C) | 109.5    |
| H(24B)-C(24)-H(24C) | 109.5    |
| C(26)-C(25)-H(25A)  | 109.5    |
| C(26)-C(25)-H(25B)  | 109.5    |
| H(25A)-C(25)-H(25B) | 109.5    |
| C(26)-C(25)-H(25C)  | 109.5    |
| H(25A)-C(25)-H(25C) | 109.5    |
| H(25B)-C(25)-H(25C) | 109.5    |
| C(25)-C(26)-C(27)   | 108.9(8) |
| C(25)-C(26)-C(28)   | 110.5(6) |
| C(27)-C(26)-C(28)   | 110.9(7) |
| C(25)-C(26)-H(26)   | 108.8    |
| C(27)-C(26)-H(26)   | 108.8    |
| C(28)-C(26)-H(26)   | 108.8    |
| C(26)-C(27)-H(27A)  | 109.5    |
| C(26)-C(27)-H(27B)  | 109.5    |
| H(27A)-C(27)-H(27B) | 109.5    |
| C(26)-C(27)-H(27C)  | 109.5    |
| H(27A)-C(27)-H(27C) | 109.5    |
| H(27B)-C(27)-H(27C) | 109.5    |
| N(7)-C(28)-C(26)    | 118.2(7) |
| N(7)-C(28)-P(2)     | 113.7(4) |
| C(26)-C(28)-P(2)    | 128.2(6) |
| N(5)-C(29)-C(30)    | 119.0(6) |
| N(5)-C(29)-P(2)     | 113.4(4) |
| C(30)-C(29)-P(2)    | 127.5(5) |
| C(31)-C(30)-C(32)   | 109.8(8) |
| C(31)-C(30)-C(29)   | 112.6(6) |
| C(32)-C(30)-C(29)   | 110.7(7) |
| C(31)-C(30)-H(30)   | 107.9    |



|                     |          |
|---------------------|----------|
| C(32)-C(30)-H(30)   | 107.9    |
| C(29)-C(30)-H(30)   | 107.9    |
| C(30)-C(31)-H(31A)  | 109.5    |
| C(30)-C(31)-H(31B)  | 109.5    |
| H(31A)-C(31)-H(31B) | 109.5    |
| C(30)-C(31)-H(31C)  | 109.5    |
| H(31A)-C(31)-H(31C) | 109.5    |
| H(31B)-C(31)-H(31C) | 109.5    |
| C(30)-C(32)-H(32A)  | 109.5    |
| C(30)-C(32)-H(32B)  | 109.5    |
| H(32A)-C(32)-H(32B) | 109.5    |
| C(30)-C(32)-H(32C)  | 109.5    |
| H(32A)-C(32)-H(32C) | 109.5    |
| H(32B)-C(32)-H(32C) | 109.5    |
| C(4)-N(1)-N(3)      | 111.2(5) |
| C(4)-N(1)-Bi(1)#1   | 142.0(4) |
| N(3)-N(1)-Bi(1)#1   | 106.8(3) |
| C(12)-N(2)-N(4)     | 112.6(5) |
| C(12)-N(2)-Bi(1)    | 138.2(4) |
| N(4)-N(2)-Bi(1)     | 109.1(3) |
| C(5)-N(3)-N(1)      | 114.1(4) |
| C(5)-N(3)-Bi(1)     | 137.6(4) |
| N(1)-N(3)-Bi(1)     | 108.3(3) |
| C(13)-N(4)-N(2)     | 112.8(5) |
| C(13)-N(4)-Bi(1)#1  | 140.9(4) |
| N(2)-N(4)-Bi(1)#1   | 105.8(3) |
| C(29)-N(5)-N(7)     | 113.4(5) |
| C(29)-N(5)-Bi(2)#2  | 136.5(4) |
| N(7)-N(5)-Bi(2)#2   | 109.9(4) |
| C(21)-N(6)-N(8)     | 112.8(5) |
| C(21)-N(6)-Bi(2)    | 138.1(4) |
| N(8)-N(6)-Bi(2)     | 109.1(3) |
| C(28)-N(7)-N(5)     | 112.5(5) |
| C(28)-N(7)-Bi(2)    | 142.0(4) |
| N(5)-N(7)-Bi(2)     | 105.5(3) |
| C(20)-N(8)-N(6)     | 111.5(5) |
| C(20)-N(8)-Bi(2)#2  | 142.5(4) |
| N(6)-N(8)-Bi(2)#2   | 105.9(3) |
| C(21)-P(1)-C(20)    | 87.0(3)  |
| C(28)-P(2)-C(29)    | 87.0(3)  |
| C(4)-P(3)-C(5)      | 87.3(3)  |
| C(12)-P(4)-C(13)    | 87.0(3)  |

Symmetry transformations used to generate equivalent atoms:

#1  $-x+1, -y+2, -z+1$     #2  $-x+1, -y+1, -z$

Table 4. Anisotropic displacement parameters ( $\text{Å}^2 \times 10^3$ ) for **5**.

The anisotropic displacement factor exponent takes the form:

$$-2 \pi^2 [ h^2 a^{*2} U_{11} + \dots + 2 h k a^* b^* U_{12} ]$$

|        | U11     | U22    | U33    | U23    | U13    | U12    |
|--------|---------|--------|--------|--------|--------|--------|
| Bi (1) | 39(1)   | 38(1)  | 31(1)  | -6(1)  | 3(1)   | 1(1)   |
| Bi (2) | 44(1)   | 35(1)  | 38(1)  | 5(1)   | 7(1)   | 6(1)   |
| C (1)  | 146(10) | 141(8) | 49(5)  | -14(5) | 39(6)  | 4(7)   |
| C (2)  | 97(7)   | 43(4)  | 35(4)  | -1(3)  | 7(4)   | 11(4)  |
| C (3)  | 93(8)   | 156(9) | 64(6)  | -35(5) | -27(5) | 18(7)  |
| C (4)  | 60(5)   | 34(3)  | 42(4)  | 2(3)   | 10(3)  | 13(3)  |
| C (5)  | 43(4)   | 38(3)  | 50(4)  | 2(3)   | 12(3)  | 6(3)   |
| C (6)  | 46(4)   | 41(4)  | 54(4)  | -12(3) | 8(3)   | -1(3)  |
| C (7)  | 163(10) | 41(4)  | 80(6)  | -10(4) | 0(6)   | -19(5) |
| C (8)  | 63(6)   | 66(5)  | 56(4)  | -16(3) | 4(4)   | 0(4)   |
| C (9)  | 114(8)  | 46(4)  | 86(6)  | -4(4)  | 19(5)  | 19(4)  |
| C (10) | 52(5)   | 45(4)  | 57(4)  | -4(3)  | 21(3)  | 4(3)   |
| C (11) | 136(9)  | 73(5)  | 50(5)  | 0(4)   | 23(5)  | 6(5)   |
| C (12) | 46(4)   | 33(3)  | 43(3)  | 3(3)   | 18(3)  | 1(3)   |
| C (13) | 34(4)   | 44(3)  | 45(4)  | 3(3)   | 3(3)   | 2(3)   |
| C (14) | 45(5)   | 73(5)  | 52(4)  | -8(3)  | -5(3)  | 7(4)   |
| C (15) | 62(6)   | 87(6)  | 86(6)  | 4(4)   | -3(5)  | -13(5) |
| C (16) | 100(8)  | 118(7) | 61(5)  | 18(5)  | -11(5) | -25(6) |
| C (17) | 206(10) | 69(4)  | 162(7) | 12(4)  | 91(7)  | 50(5)  |
| C (18) | 93(7)   | 47(4)  | 87(6)  | -13(4) | 8(5)   | 14(4)  |
| C (19) | 206(10) | 69(4)  | 162(7) | 12(4)  | 91(7)  | 50(5)  |
| C (20) | 55(5)   | 42(4)  | 47(4)  | -13(3) | 1(3)   | 10(3)  |
| C (21) | 41(4)   | 59(4)  | 33(3)  | 0(3)   | 9(3)   | 0(3)   |
| C (22) | 54(5)   | 82(5)  | 49(4)  | 17(4)  | 20(4)  | 18(4)  |
| C (23) | 126(9)  | 62(5)  | 83(6)  | 9(4)   | 14(6)  | -17(5) |
| C (24) | 140(10) | 110(7) | 52(5)  | 20(5)  | 28(5)  | 12(6)  |
| C (25) | 193(8)  | 61(4)  | 90(5)  | 13(4)  | 36(5)  | 16(5)  |
| C (26) | 162(8)  | 40(4)  | 65(5)  | 12(3)  | 35(5)  | 7(4)   |
| C (27) | 142(11) | 116(8) | 122(8) | 68(7)  | 35(8)  | -8(7)  |
| C (28) | 54(5)   | 38(3)  | 52(4)  | 2(3)   | 7(3)   | -5(3)  |
| C (29) | 46(5)   | 49(4)  | 49(4)  | 4(3)   | -1(3)  | 4(3)   |

|       |         |        |        |       |         |         |
|-------|---------|--------|--------|-------|---------|---------|
| C(30) | 55(5)   | 59(4)  | 80(5)  | 19(4) | -13(4)  | 5(4)    |
| C(31) | 90(7)   | 93(6)  | 63(5)  | 18(4) | -6(5)   | 14(5)   |
| C(32) | 259(17) | 132(9) | 114(9) | -3(7) | -13(10) | 124(11) |
| N(1)  | 50(4)   | 39(3)  | 36(3)  | -7(2) | 3(2)    | -2(2)   |
| N(2)  | 34(3)   | 37(3)  | 42(3)  | -7(2) | 3(2)    | 4(2)    |
| N(3)  | 47(3)   | 36(3)  | 35(3)  | -1(2) | 8(2)    | 2(2)    |
| N(4)  | 43(3)   | 42(3)  | 38(3)  | -6(2) | 1(2)    | 9(2)    |
| N(5)  | 45(4)   | 37(3)  | 49(3)  | 7(2)  | 2(3)    | 6(2)    |
| N(6)  | 44(3)   | 44(3)  | 36(3)  | 2(2)  | 13(2)   | 10(2)   |
| N(7)  | 47(4)   | 45(3)  | 37(3)  | 2(2)  | 6(2)    | 2(3)    |
| N(8)  | 52(4)   | 41(3)  | 42(3)  | -3(2) | 6(3)    | 9(3)    |
| P(1)  | 72(2)   | 71(1)  | 49(1)  | -8(1) | 21(1)   | 20(1)   |
| P(2)  | 57(2)   | 63(1)  | 90(2)  | 16(1) | -19(1)  | -13(1)  |
| P(3)  | 79(2)   | 45(1)  | 49(1)  | 6(1)  | 21(1)   | -3(1)   |
| P(4)  | 49(1)   | 56(1)  | 67(1)  | -3(1) | 4(1)    | 20(1)   |

Table 5. Hydrogen coordinates ( $\times 10^4$ ) and isotropic displacement parameters ( $\text{\AA}^2 \times 10^3$ ) for **5**.

|       | x    | y    | z    | U(eq) |
|-------|------|------|------|-------|
| H(1A) | 3393 | 8278 | 8509 | 165   |
| H(1B) | 2560 | 9177 | 8275 | 165   |
| H(1C) | 3795 | 9261 | 9047 | 165   |
| H(2)  | 4146 | 9993 | 7710 | 71    |
| H(3A) | 5783 | 8527 | 8366 | 165   |
| H(3B) | 5970 | 9623 | 8675 | 165   |
| H(3C) | 6157 | 9328 | 7717 | 165   |
| H(6)  | 3213 | 7015 | 4483 | 57    |
| H(7A) | 2664 | 5847 | 5451 | 149   |
| H(7B) | 1653 | 5756 | 4543 | 149   |
| H(7C) | 1289 | 6250 | 5380 | 149   |
| H(8A) | 729  | 7676 | 4419 | 95    |
| H(8B) | 1180 | 7163 | 3624 | 95    |
| H(8C) | 1790 | 8201 | 3961 | 95    |
| H(9A) | 8150 | 6491 | 3995 | 122   |
| H(9B) | 6803 | 5931 | 3614 | 122   |
| H(9C) | 7255 | 6113 | 4648 | 122   |
| H(10) | 5696 | 7183 | 3967 | 60    |

|        |       |       |       |     |
|--------|-------|-------|-------|-----|
| H(11A) | 6520  | 8441  | 3082  | 129 |
| H(11B) | 6315  | 7412  | 2610  | 129 |
| H(11C) | 7716  | 7825  | 3070  | 129 |
| H(14)  | 8561  | 10171 | 6908  | 70  |
| H(15A) | 10823 | 9538  | 6409  | 122 |
| H(15B) | 10783 | 10469 | 6996  | 122 |
| H(15C) | 10094 | 10431 | 5984  | 122 |
| H(16A) | 8578  | 8802  | 7784  | 148 |
| H(16B) | 9914  | 9409  | 8073  | 148 |
| H(16C) | 9817  | 8471  | 7470  | 148 |
| H(17A) | 3080  | 8263  | 2237  | 204 |
| H(17B) | 1678  | 7790  | 1858  | 204 |
| H(17C) | 2175  | 8746  | 1441  | 204 |
| H(18)  | 2289  | 7396  | 503   | 92  |
| H(19A) | 4636  | 8373  | 1349  | 204 |
| H(19B) | 3740  | 8670  | 456   | 204 |
| H(19C) | 4529  | 7742  | 475   | 204 |
| H(22)  | 5152  | 4041  | 2734  | 72  |
| H(23A) | 2484  | 3516  | 2496  | 138 |
| H(23B) | 3596  | 2805  | 2752  | 138 |
| H(23C) | 3340  | 3270  | 1802  | 138 |
| H(24A) | 4887  | 4934  | 3975  | 149 |
| H(24B) | 4479  | 3832  | 4083  | 149 |
| H(24C) | 3410  | 4573  | 3806  | 149 |
| H(25A) | 1479  | 1389  | -1356 | 170 |
| H(25B) | 2329  | 778   | -627  | 170 |
| H(25C) | 3001  | 1511  | -1207 | 170 |
| H(26)  | 3128  | 2201  | 180   | 105 |
| H(27A) | 439   | 1721  | -161  | 189 |
| H(27B) | 1056  | 2518  | 565   | 189 |
| H(27C) | 1462  | 1445  | 679   | 189 |
| H(30)  | 2052  | 5928  | -2064 | 81  |
| H(31A) | 852   | 4924  | -3207 | 127 |
| H(31B) | 208   | 5911  | -3161 | 127 |
| H(31C) | -377  | 4968  | -2773 | 127 |
| H(32A) | 376   | 6753  | -1712 | 255 |
| H(32B) | 1150  | 6310  | -838  | 255 |
| H(32C) | -193  | 5808  | -1317 | 255 |

---

Table 6. Torsion angles [deg] for **5**.

---

|                        |           |
|------------------------|-----------|
| C(1)-C(2)-C(4)-N(1)    | 160.4(6)  |
| C(3)-C(2)-C(4)-N(1)    | -74.5(8)  |
| C(1)-C(2)-C(4)-P(3)    | -20.6(9)  |
| C(3)-C(2)-C(4)-P(3)    | 104.4(7)  |
| N(3)-C(5)-C(6)-C(8)    | -68.0(8)  |
| P(3)-C(5)-C(6)-C(8)    | 110.7(6)  |
| N(3)-C(5)-C(6)-C(7)    | 168.7(6)  |
| P(3)-C(5)-C(6)-C(7)    | -12.6(9)  |
| C(9)-C(10)-C(12)-N(2)  | -165.3(6) |
| C(11)-C(10)-C(12)-N(2) | 73.5(7)   |
| C(9)-C(10)-C(12)-P(4)  | 17.2(8)   |
| C(11)-C(10)-C(12)-P(4) | -104.0(6) |
| N(4)-C(13)-C(14)-C(16) | 125.0(7)  |
| P(4)-C(13)-C(14)-C(16) | -56.9(8)  |
| N(4)-C(13)-C(14)-C(15) | -112.2(7) |
| P(4)-C(13)-C(14)-C(15) | 65.9(8)   |
| C(19)-C(18)-C(20)-N(8) | -60.0(9)  |
| C(17)-C(18)-C(20)-N(8) | -177.6(8) |
| C(19)-C(18)-C(20)-P(1) | 122.5(7)  |
| C(17)-C(18)-C(20)-P(1) | 4.9(11)   |
| N(6)-C(21)-C(22)-C(23) | -73.3(8)  |
| P(1)-C(21)-C(22)-C(23) | 103.8(7)  |
| N(6)-C(21)-C(22)-C(24) | 163.5(6)  |
| P(1)-C(21)-C(22)-C(24) | -19.4(9)  |
| C(25)-C(26)-C(28)-N(7) | -118.8(8) |
| C(27)-C(26)-C(28)-N(7) | 120.4(8)  |
| C(25)-C(26)-C(28)-P(2) | 61.2(10)  |
| C(27)-C(26)-C(28)-P(2) | -59.7(9)  |
| N(5)-C(29)-C(30)-C(31) | 150.8(7)  |
| P(2)-C(29)-C(30)-C(31) | -33.4(10) |
| N(5)-C(29)-C(30)-C(32) | -85.9(10) |
| P(2)-C(29)-C(30)-C(32) | 89.9(9)   |
| C(2)-C(4)-N(1)-N(3)    | 178.4(5)  |
| P(3)-C(4)-N(1)-N(3)    | -0.7(6)   |
| C(2)-C(4)-N(1)-Bi(1)#1 | 2.9(10)   |
| P(3)-C(4)-N(1)-Bi(1)#1 | -176.2(4) |
| C(10)-C(12)-N(2)-N(4)  | -177.7(5) |
| P(4)-C(12)-N(2)-N(4)   | 0.2(6)    |
| C(10)-C(12)-N(2)-Bi(1) | 5.2(8)    |
| P(4)-C(12)-N(2)-Bi(1)  | -176.9(3) |

|                          |           |
|--------------------------|-----------|
| N(3)-Bi(1)-N(2)-C(12)    | 97.1(5)   |
| N(4)#1-Bi(1)-N(2)-C(12)  | 169.1(5)  |
| N(1)#1-Bi(1)-N(2)-C(12)  | -116.6(5) |
| Bi(1)#1-Bi(1)-N(2)-C(12) | 172.9(6)  |
| N(3)-Bi(1)-N(2)-N(4)     | -80.1(3)  |
| N(4)#1-Bi(1)-N(2)-N(4)   | -8.1(6)   |
| N(1)#1-Bi(1)-N(2)-N(4)   | 66.3(3)   |
| Bi(1)#1-Bi(1)-N(2)-N(4)  | -4.3(3)   |
| C(6)-C(5)-N(3)-N(1)      | 179.5(5)  |
| P(3)-C(5)-N(3)-N(1)      | 0.6(6)    |
| C(6)-C(5)-N(3)-Bi(1)     | -1.6(9)   |
| P(3)-C(5)-N(3)-Bi(1)     | 179.5(3)  |
| C(4)-N(1)-N(3)-C(5)      | 0.1(7)    |
| Bi(1)#1-N(1)-N(3)-C(5)   | 177.2(4)  |
| C(4)-N(1)-N(3)-Bi(1)     | -179.1(4) |
| Bi(1)#1-N(1)-N(3)-Bi(1)  | -2.1(4)   |
| N(2)-Bi(1)-N(3)-C(5)     | -101.8(6) |
| N(4)#1-Bi(1)-N(3)-C(5)   | 111.6(6)  |
| N(1)#1-Bi(1)-N(3)-C(5)   | -175.5(5) |
| Bi(1)#1-Bi(1)-N(3)-C(5)  | -177.1(6) |
| N(2)-Bi(1)-N(3)-N(1)     | 77.2(4)   |
| N(4)#1-Bi(1)-N(3)-N(1)   | -69.4(4)  |
| N(1)#1-Bi(1)-N(3)-N(1)   | 3.4(6)    |
| Bi(1)#1-Bi(1)-N(3)-N(1)  | 1.8(3)    |
| C(14)-C(13)-N(4)-N(2)    | 177.7(5)  |
| P(4)-C(13)-N(4)-N(2)     | -0.6(6)   |
| C(14)-C(13)-N(4)-Bi(1)#1 | -12.4(10) |
| P(4)-C(13)-N(4)-Bi(1)#1  | 169.3(4)  |
| C(12)-N(2)-N(4)-C(13)    | 0.3(7)    |
| Bi(1)-N(2)-N(4)-C(13)    | 178.2(4)  |
| C(12)-N(2)-N(4)-Bi(1)#1  | -173.1(3) |
| Bi(1)-N(2)-N(4)-Bi(1)#1  | 4.8(3)    |
| C(30)-C(29)-N(5)-N(7)    | 176.8(6)  |
| P(2)-C(29)-N(5)-N(7)     | 0.4(7)    |
| C(30)-C(29)-N(5)-Bi(2)#2 | -8.0(10)  |
| P(2)-C(29)-N(5)-Bi(2)#2  | 175.5(3)  |
| C(22)-C(21)-N(6)-N(8)    | 177.7(5)  |
| P(1)-C(21)-N(6)-N(8)     | 0.2(7)    |
| C(22)-C(21)-N(6)-Bi(2)   | -4.3(10)  |
| P(1)-C(21)-N(6)-Bi(2)    | 178.2(3)  |
| N(5)#2-Bi(2)-N(6)-C(21)  | -103.9(6) |
| N(8)#2-Bi(2)-N(6)-C(21)  | -178.2(5) |
| N(7)-Bi(2)-N(6)-C(21)    | 110.5(6)  |
| Bi(2)#2-Bi(2)-N(6)-C(21) | -178.2(6) |

|                          |           |
|--------------------------|-----------|
| N(5)#2-Bi(2)-N(6)-N(8)   | 74.2(4)   |
| N(8)#2-Bi(2)-N(6)-N(8)   | -0.1(6)   |
| N(7)-Bi(2)-N(6)-N(8)     | -71.4(4)  |
| Bi(2)#2-Bi(2)-N(6)-N(8)  | -0.1(3)   |
| C(26)-C(28)-N(7)-N(5)    | -179.0(5) |
| P(2)-C(28)-N(7)-N(5)     | 1.0(7)    |
| C(26)-C(28)-N(7)-Bi(2)   | 2.0(10)   |
| P(2)-C(28)-N(7)-Bi(2)    | -178.0(4) |
| C(29)-N(5)-N(7)-C(28)    | -0.9(7)   |
| Bi(2)#2-N(5)-N(7)-C(28)  | -177.3(4) |
| C(29)-N(5)-N(7)-Bi(2)    | 178.5(4)  |
| Bi(2)#2-N(5)-N(7)-Bi(2)  | 2.0(4)    |
| N(5)#2-Bi(2)-N(7)-C(28)  | 175.8(6)  |
| N(6)-Bi(2)-N(7)-C(28)    | -108.4(7) |
| N(8)#2-Bi(2)-N(7)-C(28)  | 104.8(7)  |
| Bi(2)#2-Bi(2)-N(7)-C(28) | 177.4(7)  |
| N(5)#2-Bi(2)-N(7)-N(5)   | -3.3(6)   |
| N(6)-Bi(2)-N(7)-N(5)     | 72.6(3)   |
| N(8)#2-Bi(2)-N(7)-N(5)   | -74.2(3)  |
| Bi(2)#2-Bi(2)-N(7)-N(5)  | -1.7(3)   |
| C(18)-C(20)-N(8)-N(6)    | -178.9(6) |
| P(1)-C(20)-N(8)-N(6)     | -1.1(7)   |
| C(18)-C(20)-N(8)-Bi(2)#2 | 4.1(11)   |
| P(1)-C(20)-N(8)-Bi(2)#2  | -178.1(4) |
| C(21)-N(6)-N(8)-C(20)    | 0.6(7)    |
| Bi(2)-N(6)-N(8)-C(20)    | -178.0(4) |
| C(21)-N(6)-N(8)-Bi(2)#2  | 178.7(4)  |
| Bi(2)-N(6)-N(8)-Bi(2)#2  | 0.1(4)    |
| N(6)-C(21)-P(1)-C(20)    | -0.6(5)   |
| C(22)-C(21)-P(1)-C(20)   | -177.8(6) |
| N(8)-C(20)-P(1)-C(21)    | 1.0(5)    |
| C(18)-C(20)-P(1)-C(21)   | 178.6(7)  |
| N(7)-C(28)-P(2)-C(29)    | -0.7(5)   |
| C(26)-C(28)-P(2)-C(29)   | 179.4(6)  |
| N(5)-C(29)-P(2)-C(28)    | 0.1(5)    |
| C(30)-C(29)-P(2)-C(28)   | -175.9(6) |
| N(1)-C(4)-P(3)-C(5)      | 0.9(5)    |
| C(2)-C(4)-P(3)-C(5)      | -178.1(6) |
| N(3)-C(5)-P(3)-C(4)      | -0.8(5)   |
| C(6)-C(5)-P(3)-C(4)      | -179.6(6) |
| N(2)-C(12)-P(4)-C(13)    | -0.4(4)   |
| C(10)-C(12)-P(4)-C(13)   | 177.2(5)  |
| N(4)-C(13)-P(4)-C(12)    | 0.5(5)    |
| C(14)-C(13)-P(4)-C(12)   | -177.6(6) |

---

Symmetry transformations used to generate equivalent atoms:  
#1  $-x+1, -y+2, -z+1$     #2  $-x+1, -y+1, -z$

### 3.3 Crystal structural analysis data for **6**

Table 1. Crystal data and structure refinement for **6**.

|                                 |                                                                                                                              |
|---------------------------------|------------------------------------------------------------------------------------------------------------------------------|
| Identification code             | 141015-3a                                                                                                                    |
| Empirical formula               | $C_{56}H_{40}Bi_2N_8P_4$                                                                                                     |
| Formula weight                  | 1366.80                                                                                                                      |
| Temperature                     | 289.70(10) K                                                                                                                 |
| Wavelength                      | 0.7107 Å                                                                                                                     |
| Crystal system, space group     | Triclinic, $P-1$                                                                                                             |
| Unit cell dimensions            | $a = 9.4968(2)$ Å $\alpha = 90$ deg.<br>$b = 20.3504(4)$ Å $\beta = 97.027(2)$ deg.<br>$c = 13.5884(2)$ Å $\gamma = 90$ deg. |
| Volume                          | $2606.42(8)$ Å <sup>3</sup>                                                                                                  |
| $Z$ , Calculated density        | 2, 1.742 Mg/m <sup>3</sup>                                                                                                   |
| Absorption coefficient          | $6.911$ mm <sup>-1</sup>                                                                                                     |
| $F(000)$                        | 1316                                                                                                                         |
| Crystal size                    | $0.4300 \times 0.2300 \times 0.2100$ mm                                                                                      |
| Theta range for data collection | 2.78 to 26.37 deg.                                                                                                           |
| Limiting indices                | $-11 \leq h \leq 11, -25 \leq k \leq 25, -16 \leq l \leq 16$                                                                 |



|                                        |                                           |
|----------------------------------------|-------------------------------------------|
| Reflections collected / unique         | 26600 / 5319 [ $R(\text{int}) = 0.0445$ ] |
| Completeness to theta = 26.37          | 99.9 %                                    |
| Absorption correction                  | Semi-empirical from equivalents           |
| Max. and min. transmission             | 1.00000 and 0.81939                       |
| Refinement method                      | Full-matrix least-squares on $F^2$        |
| Data / restraints / parameters         | 5319 / 0 / 316                            |
| Goodness-of-fit on $F^2$               | 1.020                                     |
| Final $R$ indices [ $I > 2\sigma(I)$ ] | $R_1 = 0.0296$ , $wR_2 = 0.0415$          |
| $R$ indices (all data)                 | $R_1 = 0.0574$ , $wR_2 = 0.0462$          |
| Largest diff. peak and hole            | 0.948 and $-0.683 \text{ e. \AA}^{-3}$    |

Table 2. Atomic coordinates ( $\times 10^4$ ) and equivalent isotropic displacement parameters ( $\text{\AA}^2 \times 10^3$ ) for **6**.  
 $U(\text{eq})$  is defined as one third of the trace of the orthogonalized  $U_{ij}$  tensor.

|        | x         | y        | z         | U(eq)  |
|--------|-----------|----------|-----------|--------|
| Bi (1) | -357 (1)  | 4947 (1) | 8939 (1)  | 30 (1) |
| C (1)  | -796 (5)  | 6362 (2) | 7328 (3)  | 50 (1) |
| C (2)  | -1137 (5) | 6329 (3) | 6314 (3)  | 65 (2) |
| C (3)  | -2447 (5) | 6536 (3) | 5878 (3)  | 62 (2) |
| C (4)  | -3411 (5) | 6766 (3) | 6463 (3)  | 58 (1) |
| C (5)  | -3096 (5) | 6796 (2) | 7477 (3)  | 47 (1) |
| C (6)  | -1781 (5) | 6591 (2) | 7927 (3)  | 35 (1) |
| C (7)  | -1453 (4) | 6598 (2) | 9022 (3)  | 34 (1) |
| C (8)  | -983 (4)  | 6684 (2) | 10793 (3) | 34 (1) |
| C (9)  | -770 (5)  | 6811 (2) | 11863 (3) | 38 (1) |
| C (10) | 435 (5)   | 6586 (2) | 12459 (3) | 44 (1) |
| C (11) | 621 (6)   | 6703 (2) | 13468 (3) | 54 (1) |
| C (12) | -367 (6)  | 7050 (3) | 13901 (4) | 63 (2) |

|       |          |         |          |       |
|-------|----------|---------|----------|-------|
| C(13) | -1563(6) | 7281(3) | 13329(4) | 62(2) |
| C(14) | -1753(5) | 7158(2) | 12313(3) | 50(1) |
| C(15) | 4428(5)  | 6462(3) | 11878(4) | 71(2) |
| C(16) | 4724(6)  | 6598(4) | 12880(5) | 94(2) |
| C(17) | 4614(6)  | 6113(5) | 13557(5) | 96(3) |
| C(18) | 4211(5)  | 5488(4) | 13265(4) | 79(2) |
| C(19) | 3926(4)  | 5350(3) | 12259(3) | 56(1) |
| C(20) | 4020(4)  | 5839(3) | 11554(3) | 47(1) |
| C(21) | 3619(4)  | 5700(2) | 10489(3) | 40(1) |
| C(22) | 3070(4)  | 5530(2) | 8735(3)  | 36(1) |
| C(23) | 2827(4)  | 5452(2) | 7653(3)  | 37(1) |
| C(24) | 3126(5)  | 5955(2) | 7022(3)  | 51(1) |
| C(25) | 2827(5)  | 5894(3) | 6005(4)  | 63(2) |
| C(26) | 2205(5)  | 5332(3) | 5591(4)  | 63(2) |
| C(27) | 1915(5)  | 4823(3) | 6205(3)  | 58(1) |
| C(28) | 2230(5)  | 4880(2) | 7215(3)  | 48(1) |
| N(1)  | 2142(3)  | 5238(2) | 9263(2)  | 36(1) |
| N(2)  | 2450(3)  | 5338(2) | 10248(2) | 39(1) |
| N(3)  | -740(3)  | 6082(2) | 9435(2)  | 34(1) |
| N(4)  | -474(3)  | 6131(2) | 10440(2) | 35(1) |
| P(1)  | -1833(1) | 7197(1) | 9869(1)  | 47(1) |
| P(2)  | 4433(1)  | 5948(1) | 9463(1)  | 51(1) |

---

Table 3. Bond lengths [Å] and angles [deg] for **6**.

---

|               |           |
|---------------|-----------|
| Bi(1)-N(1)    | 2.433(3)  |
| Bi(1)-N(3)    | 2.444(3)  |
| Bi(1)-N(4)#1  | 2.447(3)  |
| Bi(1)-N(2)#1  | 2.458(3)  |
| Bi(1)-Bi(1)#1 | 2.8873(3) |
| C(1)-C(2)     | 1.379(6)  |
| C(1)-C(6)     | 1.392(6)  |
| C(1)-H(1)     | 0.9300    |
| C(2)-C(3)     | 1.376(6)  |
| C(2)-H(2)     | 0.9300    |
| C(3)-C(4)     | 1.366(6)  |
| C(3)-H(3)     | 0.9300    |
| C(4)-C(5)     | 1.376(6)  |
| C(4)-H(4)     | 0.9300    |
| C(5)-C(6)     | 1.386(5)  |
| C(5)-H(5)     | 0.9300    |

|             |          |
|-------------|----------|
| C(6)–C(7)   | 1.483(5) |
| C(7)–N(3)   | 1.336(5) |
| C(7)–P(1)   | 1.743(4) |
| C(8)–N(4)   | 1.336(5) |
| C(8)–C(9)   | 1.467(5) |
| C(8)–P(1)   | 1.751(4) |
| C(9)–C(14)  | 1.373(6) |
| C(9)–C(10)  | 1.396(5) |
| C(10)–C(11) | 1.381(6) |
| C(10)–H(10) | 0.9300   |
| C(11)–C(12) | 1.364(6) |
| C(11)–H(11) | 0.9300   |
| C(12)–C(13) | 1.379(6) |
| C(12)–H(12) | 0.9300   |
| C(13)–C(14) | 1.392(6) |
| C(13)–H(13) | 0.9300   |
| C(14)–H(14) | 0.9300   |
| C(15)–C(20) | 1.383(7) |
| C(15)–C(16) | 1.384(7) |
| C(15)–H(15) | 0.9300   |
| C(16)–C(17) | 1.362(9) |
| C(16)–H(16) | 0.9300   |
| C(17)–C(18) | 1.372(9) |
| C(17)–H(17) | 0.9300   |
| C(18)–C(19) | 1.390(6) |
| C(18)–H(18) | 0.9300   |
| C(19)–C(20) | 1.392(6) |
| C(19)–H(19) | 0.9300   |
| C(20)–C(21) | 1.477(5) |
| C(21)–N(2)  | 1.339(5) |
| C(21)–P(2)  | 1.749(4) |
| C(22)–N(1)  | 1.341(5) |
| C(22)–C(23) | 1.468(5) |
| C(22)–P(2)  | 1.751(4) |
| C(23)–C(24) | 1.386(6) |
| C(23)–C(28) | 1.396(6) |
| C(24)–C(25) | 1.382(6) |
| C(24)–H(24) | 0.9300   |
| C(25)–C(26) | 1.375(7) |
| C(25)–H(25) | 0.9300   |
| C(26)–C(27) | 1.377(6) |
| C(26)–H(26) | 0.9300   |
| C(27)–C(28) | 1.374(6) |
| C(27)–H(27) | 0.9300   |

|                      |            |
|----------------------|------------|
| C(28)-H(28)          | 0.9300     |
| N(1)-N(2)            | 1.351(4)   |
| N(2)-Bi(1)#1         | 2.458(3)   |
| N(3)-N(4)            | 1.362(4)   |
| N(4)-Bi(1)#1         | 2.447(3)   |
| N(1)-Bi(1)-N(3)      | 83.99(11)  |
| N(1)-Bi(1)-N(4)#1    | 83.64(11)  |
| N(3)-Bi(1)-N(4)#1    | 143.58(10) |
| N(1)-Bi(1)-N(2)#1    | 143.20(10) |
| N(3)-Bi(1)-N(2)#1    | 86.79(11)  |
| N(4)#1-Bi(1)-N(2)#1  | 82.98(12)  |
| N(1)-Bi(1)-Bi(1)#1   | 72.35(8)   |
| N(3)-Bi(1)-Bi(1)#1   | 71.32(7)   |
| N(4)#1-Bi(1)-Bi(1)#1 | 72.30(7)   |
| N(2)#1-Bi(1)-Bi(1)#1 | 70.94(7)   |
| C(2)-C(1)-C(6)       | 120.5(4)   |
| C(2)-C(1)-H(1)       | 119.7      |
| C(6)-C(1)-H(1)       | 119.7      |
| C(3)-C(2)-C(1)       | 120.3(5)   |
| C(3)-C(2)-H(2)       | 119.9      |
| C(1)-C(2)-H(2)       | 119.9      |
| C(4)-C(3)-C(2)       | 119.3(4)   |
| C(4)-C(3)-H(3)       | 120.3      |
| C(2)-C(3)-H(3)       | 120.3      |
| C(3)-C(4)-C(5)       | 121.2(4)   |
| C(3)-C(4)-H(4)       | 119.4      |
| C(5)-C(4)-H(4)       | 119.4      |
| C(4)-C(5)-C(6)       | 120.1(4)   |
| C(4)-C(5)-H(5)       | 119.9      |
| C(6)-C(5)-H(5)       | 119.9      |
| C(5)-C(6)-C(1)       | 118.5(4)   |
| C(5)-C(6)-C(7)       | 120.4(4)   |
| C(1)-C(6)-C(7)       | 121.1(4)   |
| N(3)-C(7)-C(6)       | 116.5(4)   |
| N(3)-C(7)-P(1)       | 114.1(3)   |
| C(6)-C(7)-P(1)       | 129.4(3)   |
| N(4)-C(8)-C(9)       | 119.4(4)   |
| N(4)-C(8)-P(1)       | 113.6(3)   |
| C(9)-C(8)-P(1)       | 127.0(3)   |
| C(14)-C(9)-C(10)     | 117.7(4)   |
| C(14)-C(9)-C(8)      | 120.9(4)   |
| C(10)-C(9)-C(8)      | 121.4(4)   |
| C(11)-C(10)-C(9)     | 121.1(5)   |

|                   |          |
|-------------------|----------|
| C(11)-C(10)-H(10) | 119.5    |
| C(9)-C(10)-H(10)  | 119.5    |
| C(12)-C(11)-C(10) | 120.4(5) |
| C(12)-C(11)-H(11) | 119.8    |
| C(10)-C(11)-H(11) | 119.8    |
| C(11)-C(12)-C(13) | 119.8(5) |
| C(11)-C(12)-H(12) | 120.1    |
| C(13)-C(12)-H(12) | 120.1    |
| C(12)-C(13)-C(14) | 119.7(5) |
| C(12)-C(13)-H(13) | 120.1    |
| C(14)-C(13)-H(13) | 120.1    |
| C(9)-C(14)-C(13)  | 121.4(5) |
| C(9)-C(14)-H(14)  | 119.3    |
| C(13)-C(14)-H(14) | 119.3    |
| C(20)-C(15)-C(16) | 120.8(6) |
| C(20)-C(15)-H(15) | 119.6    |
| C(16)-C(15)-H(15) | 119.6    |
| C(17)-C(16)-C(15) | 119.8(7) |
| C(17)-C(16)-H(16) | 120.1    |
| C(15)-C(16)-H(16) | 120.1    |
| C(16)-C(17)-C(18) | 121.2(6) |
| C(16)-C(17)-H(17) | 119.4    |
| C(18)-C(17)-H(17) | 119.4    |
| C(17)-C(18)-C(19) | 119.1(6) |
| C(17)-C(18)-H(18) | 120.5    |
| C(19)-C(18)-H(18) | 120.5    |
| C(18)-C(19)-C(20) | 120.7(6) |
| C(18)-C(19)-H(19) | 119.6    |
| C(20)-C(19)-H(19) | 119.6    |
| C(15)-C(20)-C(19) | 118.4(5) |
| C(15)-C(20)-C(21) | 121.0(5) |
| C(19)-C(20)-C(21) | 120.5(4) |
| N(2)-C(21)-C(20)  | 116.8(4) |
| N(2)-C(21)-P(2)   | 113.4(3) |
| C(20)-C(21)-P(2)  | 129.7(3) |
| N(1)-C(22)-C(23)  | 117.1(4) |
| N(1)-C(22)-P(2)   | 113.7(3) |
| C(23)-C(22)-P(2)  | 129.2(3) |
| C(24)-C(23)-C(28) | 117.0(4) |
| C(24)-C(23)-C(22) | 121.4(4) |
| C(28)-C(23)-C(22) | 121.5(4) |
| C(25)-C(24)-C(23) | 121.3(4) |
| C(25)-C(24)-H(24) | 119.3    |
| C(23)-C(24)-H(24) | 119.3    |

|                    |           |
|--------------------|-----------|
| C(26)-C(25)-C(24)  | 120.6(5)  |
| C(26)-C(25)-H(25)  | 119.7     |
| C(24)-C(25)-H(25)  | 119.7     |
| C(25)-C(26)-C(27)  | 119.0(5)  |
| C(25)-C(26)-H(26)  | 120.5     |
| C(27)-C(26)-H(26)  | 120.5     |
| C(28)-C(27)-C(26)  | 120.4(5)  |
| C(28)-C(27)-H(27)  | 119.8     |
| C(26)-C(27)-H(27)  | 119.8     |
| C(27)-C(28)-C(23)  | 121.6(4)  |
| C(27)-C(28)-H(28)  | 119.2     |
| C(23)-C(28)-H(28)  | 119.2     |
| C(22)-N(1)-N(2)    | 112.8(3)  |
| C(22)-N(1)-Bi(1)   | 134.5(3)  |
| N(2)-N(1)-Bi(1)    | 107.7(2)  |
| C(21)-N(2)-N(1)    | 113.4(3)  |
| C(21)-N(2)-Bi(1)#1 | 135.4(3)  |
| N(1)-N(2)-Bi(1)#1  | 108.7(2)  |
| C(7)-N(3)-N(4)     | 112.6(3)  |
| C(7)-N(3)-Bi(1)    | 135.4(3)  |
| N(4)-N(3)-Bi(1)    | 109.3(2)  |
| C(8)-N(4)-N(3)     | 113.0(3)  |
| C(8)-N(4)-Bi(1)#1  | 138.4(3)  |
| N(3)-N(4)-Bi(1)#1  | 107.0(2)  |
| C(7)-P(1)-C(8)     | 86.68(19) |
| C(21)-P(2)-C(22)   | 86.7(2)   |

---

Symmetry transformations used to generate equivalent atoms:  
#1 -x, -y+1, -z+2

Table 4. Anisotropic displacement parameters ( $\text{\AA}^2 \times 10^3$ ) for **6**.  
The anisotropic displacement factor exponent takes the form:  
 $-2 \pi^2 [ h^2 a^{*2} U_{11} + \dots + 2 h k a^* b^* U_{12} ]$

---

|       | U11   | U22   | U33   | U23   | U13   | U12   |
|-------|-------|-------|-------|-------|-------|-------|
| Bi(1) | 37(1) | 34(1) | 19(1) | 0(1)  | 1(1)  | 1(1)  |
| C(1)  | 43(3) | 65(4) | 42(3) | 12(3) | 3(2)  | 17(3) |
| C(2)  | 69(4) | 92(4) | 38(3) | 10(3) | 21(3) | 25(3) |
| C(3)  | 65(4) | 92(4) | 28(3) | 2(3)  | 2(3)  | 15(3) |

---

|       |       |        |       |        |        |        |
|-------|-------|--------|-------|--------|--------|--------|
| C(4)  | 52(3) | 83(4)  | 37(3) | -5(3)  | -7(2)  | 16(3)  |
| C(5)  | 47(3) | 56(3)  | 38(3) | -5(2)  | 0(2)   | 17(2)  |
| C(6)  | 46(3) | 26(2)  | 32(2) | 3(2)   | 0(2)   | 3(2)   |
| C(7)  | 36(3) | 32(2)  | 32(2) | 4(2)   | -1(2)  | 5(2)   |
| C(8)  | 42(3) | 29(2)  | 30(2) | -2(2)  | 3(2)   | -3(2)  |
| C(9)  | 49(3) | 26(2)  | 37(2) | -2(2)  | -1(2)  | -8(2)  |
| C(10) | 52(3) | 38(3)  | 39(3) | -7(2)  | -8(2)  | -3(2)  |
| C(11) | 73(4) | 45(3)  | 38(3) | 2(2)   | -15(3) | -14(3) |
| C(12) | 84(4) | 75(4)  | 28(2) | -10(3) | 7(3)   | -36(4) |
| C(13) | 66(4) | 80(4)  | 46(3) | -14(3) | 26(3)  | -11(3) |
| C(14) | 51(3) | 56(3)  | 43(3) | -8(2)  | 3(2)   | 0(3)   |
| C(15) | 55(4) | 93(5)  | 68(4) | -29(3) | 12(3)  | -26(3) |
| C(16) | 59(4) | 142(7) | 82(5) | -66(5) | 9(4)   | -28(4) |
| C(17) | 48(4) | 191(9) | 48(4) | -44(5) | -1(3)  | -3(5)  |
| C(18) | 46(4) | 148(7) | 40(3) | 1(4)   | -2(3)  | 12(4)  |
| C(19) | 33(3) | 92(4)  | 42(3) | -6(3)  | 0(2)   | 11(3)  |
| C(20) | 29(3) | 71(4)  | 42(3) | -15(3) | 5(2)   | -8(2)  |
| C(21) | 35(3) | 45(3)  | 37(3) | -1(2)  | -1(2)  | -1(2)  |
| C(22) | 34(3) | 40(3)  | 35(2) | 2(2)   | 10(2)  | 0(2)   |
| C(23) | 31(3) | 44(3)  | 37(3) | 3(2)   | 16(2)  | 1(2)   |
| C(24) | 57(3) | 51(3)  | 45(3) | -2(2)  | 14(2)  | -13(3) |
| C(25) | 70(4) | 73(4)  | 47(3) | 17(3)  | 16(3)  | -8(3)  |
| C(26) | 65(4) | 86(4)  | 37(3) | -1(3)  | 4(3)   | -6(3)  |
| C(27) | 66(3) | 62(4)  | 47(3) | -14(3) | 14(3)  | -8(3)  |
| C(28) | 52(3) | 48(3)  | 46(3) | 2(2)   | 19(2)  | 3(2)   |
| N(1)  | 38(2) | 44(2)  | 26(2) | 1(2)   | 2(2)   | -6(2)  |
| N(2)  | 39(2) | 51(2)  | 26(2) | 0(2)   | 5(2)   | -4(2)  |
| N(3)  | 44(2) | 31(2)  | 25(2) | -3(2)  | -2(2)  | 4(2)   |
| N(4)  | 46(2) | 33(2)  | 24(2) | -1(2)  | -1(2)  | 3(2)   |
| P(1)  | 67(1) | 37(1)  | 35(1) | -3(1)  | -6(1)  | 16(1)  |
| P(2)  | 45(1) | 65(1)  | 45(1) | -4(1)  | 10(1)  | -18(1) |

Table 5. Hydrogen coordinates ( $\times 10^4$ ) and isotropic displacement parameters ( $\text{\AA}^2 \times 10^3$ ) for **6**.

|      | x    | y    | z    | U(eq) |
|------|------|------|------|-------|
| H(1) | 98   | 6230 | 7616 | 60    |
| H(2) | -479 | 6167 | 5922 | 78    |

|       |       |      |       |     |
|-------|-------|------|-------|-----|
| H(3)  | -2673 | 6519 | 5193  | 74  |
| H(4)  | -4297 | 6905 | 6169  | 70  |
| H(5)  | -3767 | 6955 | 7862  | 57  |
| H(10) | 1123  | 6354 | 12173 | 53  |
| H(11) | 1426  | 6545 | 13854 | 64  |
| H(12) | -234  | 7130 | 14580 | 75  |
| H(13) | -2241 | 7518 | 13620 | 75  |
| H(14) | -2563 | 7315 | 11931 | 60  |
| H(15) | 4505  | 6794 | 11417 | 86  |
| H(16) | 4997  | 7019 | 13090 | 113 |
| H(17) | 4816  | 6207 | 14229 | 115 |
| H(18) | 4129  | 5162 | 13735 | 95  |
| H(19) | 3669  | 4926 | 12055 | 67  |
| H(24) | 3536  | 6341 | 7288  | 61  |
| H(25) | 3048  | 6236 | 5596  | 75  |
| H(26) | 1983  | 5296 | 4908  | 76  |
| H(27) | 1503  | 4439 | 5933  | 69  |
| H(28) | 2042  | 4529 | 7617  | 57  |

---

Table 6. Torsion angles [deg] for **6**.

---

|                         |           |
|-------------------------|-----------|
| C(6)-C(1)-C(2)-C(3)     | 1.3(8)    |
| C(1)-C(2)-C(3)-C(4)     | -0.8(9)   |
| C(2)-C(3)-C(4)-C(5)     | 0.1(9)    |
| C(3)-C(4)-C(5)-C(6)     | 0.0(8)    |
| C(4)-C(5)-C(6)-C(1)     | 0.5(7)    |
| C(4)-C(5)-C(6)-C(7)     | -177.6(4) |
| C(2)-C(1)-C(6)-C(5)     | -1.2(7)   |
| C(2)-C(1)-C(6)-C(7)     | 177.0(4)  |
| C(5)-C(6)-C(7)-N(3)     | 138.6(4)  |
| C(1)-C(6)-C(7)-N(3)     | -39.5(6)  |
| C(5)-C(6)-C(7)-P(1)     | -42.8(6)  |
| C(1)-C(6)-C(7)-P(1)     | 139.1(4)  |
| N(4)-C(8)-C(9)-C(14)    | -148.4(4) |
| P(1)-C(8)-C(9)-C(14)    | 32.9(6)   |
| N(4)-C(8)-C(9)-C(10)    | 31.8(6)   |
| P(1)-C(8)-C(9)-C(10)    | -146.8(4) |
| C(14)-C(9)-C(10)-C(11)  | 0.7(7)    |
| C(8)-C(9)-C(10)-C(11)   | -179.5(4) |
| C(9)-C(10)-C(11)-C(12)  | -0.8(7)   |
| C(10)-C(11)-C(12)-C(13) | 0.4(7)    |



|                          |           |
|--------------------------|-----------|
| C(11)-C(12)-C(13)-C(14)  | 0.0(8)    |
| C(10)-C(9)-C(14)-C(13)   | -0.3(7)   |
| C(8)-C(9)-C(14)-C(13)    | 179.9(4)  |
| C(12)-C(13)-C(14)-C(9)   | -0.1(8)   |
| C(20)-C(15)-C(16)-C(17)  | 0.0(9)    |
| C(15)-C(16)-C(17)-C(18)  | -0.1(10)  |
| C(16)-C(17)-C(18)-C(19)  | 0.7(9)    |
| C(17)-C(18)-C(19)-C(20)  | -1.2(8)   |
| C(16)-C(15)-C(20)-C(19)  | -0.5(7)   |
| C(16)-C(15)-C(20)-C(21)  | 176.2(5)  |
| C(18)-C(19)-C(20)-C(15)  | 1.1(7)    |
| C(18)-C(19)-C(20)-C(21)  | -175.7(4) |
| C(15)-C(20)-C(21)-N(2)   | -135.1(5) |
| C(19)-C(20)-C(21)-N(2)   | 41.6(6)   |
| C(15)-C(20)-C(21)-P(2)   | 44.0(7)   |
| C(19)-C(20)-C(21)-P(2)   | -139.3(4) |
| N(1)-C(22)-C(23)-C(24)   | 144.4(4)  |
| P(2)-C(22)-C(23)-C(24)   | -36.4(6)  |
| N(1)-C(22)-C(23)-C(28)   | -32.8(6)  |
| P(2)-C(22)-C(23)-C(28)   | 146.3(4)  |
| C(28)-C(23)-C(24)-C(25)  | 0.9(7)    |
| C(22)-C(23)-C(24)-C(25)  | -176.5(4) |
| C(23)-C(24)-C(25)-C(26)  | 0.8(8)    |
| C(24)-C(25)-C(26)-C(27)  | -1.6(8)   |
| C(25)-C(26)-C(27)-C(28)  | 0.7(8)    |
| C(26)-C(27)-C(28)-C(23)  | 1.0(7)    |
| C(24)-C(23)-C(28)-C(27)  | -1.8(6)   |
| C(22)-C(23)-C(28)-C(27)  | 175.6(4)  |
| C(23)-C(22)-N(1)-N(2)    | -179.8(3) |
| P(2)-C(22)-N(1)-N(2)     | 0.9(5)    |
| C(23)-C(22)-N(1)-Bi(1)   | -28.8(6)  |
| P(2)-C(22)-N(1)-Bi(1)    | 151.9(2)  |
| N(3)-Bi(1)-N(1)-C(22)    | -84.5(4)  |
| N(4)#1-Bi(1)-N(1)-C(22)  | 129.8(4)  |
| N(2)#1-Bi(1)-N(1)-C(22)  | -161.0(3) |
| Bi(1)#1-Bi(1)-N(1)-C(22) | -156.8(4) |
| N(3)-Bi(1)-N(1)-N(2)     | 67.5(3)   |
| N(4)#1-Bi(1)-N(1)-N(2)   | -78.2(3)  |
| N(2)#1-Bi(1)-N(1)-N(2)   | -8.9(4)   |
| Bi(1)#1-Bi(1)-N(1)-N(2)  | -4.7(2)   |
| C(20)-C(21)-N(2)-N(1)    | 179.3(4)  |
| P(2)-C(21)-N(2)-N(1)     | 0.1(5)    |
| C(20)-C(21)-N(2)-Bi(1)#1 | 19.8(6)   |
| P(2)-C(21)-N(2)-Bi(1)#1  | -159.5(2) |

|                         |           |
|-------------------------|-----------|
| C(22)-N(1)-N(2)-C(21)   | -0.6(5)   |
| Bi(1)-N(1)-N(2)-C(21)   | -159.4(3) |
| C(22)-N(1)-N(2)-Bi(1)#1 | 164.4(3)  |
| Bi(1)-N(1)-N(2)-Bi(1)#1 | 5.6(3)    |
| C(6)-C(7)-N(3)-N(4)     | 179.5(3)  |
| P(1)-C(7)-N(3)-N(4)     | 0.7(5)    |
| C(6)-C(7)-N(3)-Bi(1)    | -21.6(6)  |
| P(1)-C(7)-N(3)-Bi(1)    | 159.6(2)  |
| N(1)-Bi(1)-N(3)-C(7)    | 124.2(4)  |
| N(4)#1-Bi(1)-N(3)-C(7)  | -165.1(3) |
| N(2)#1-Bi(1)-N(3)-C(7)  | -91.5(4)  |
| Bi(1)#1-Bi(1)-N(3)-C(7) | -162.4(4) |
| N(1)-Bi(1)-N(3)-N(4)    | -76.4(2)  |
| N(4)#1-Bi(1)-N(3)-N(4)  | -5.7(4)   |
| N(2)#1-Bi(1)-N(3)-N(4)  | 68.0(2)   |
| Bi(1)#1-Bi(1)-N(3)-N(4) | -3.0(2)   |
| C(9)-C(8)-N(4)-N(3)     | -179.5(3) |
| P(1)-C(8)-N(4)-N(3)     | -0.7(5)   |
| C(9)-C(8)-N(4)-Bi(1)#1  | 17.9(6)   |
| P(1)-C(8)-N(4)-Bi(1)#1  | -163.3(2) |
| C(7)-N(3)-N(4)-C(8)     | 0.0(5)    |
| Bi(1)-N(3)-N(4)-C(8)    | -164.5(3) |
| C(7)-N(3)-N(4)-Bi(1)#1  | 168.0(3)  |
| Bi(1)-N(3)-N(4)-Bi(1)#1 | 3.5(3)    |
| N(3)-C(7)-P(1)-C(8)     | -0.9(3)   |
| C(6)-C(7)-P(1)-C(8)     | -179.5(4) |
| N(4)-C(8)-P(1)-C(7)     | 0.8(3)    |
| C(9)-C(8)-P(1)-C(7)     | 179.6(4)  |
| N(2)-C(21)-P(2)-C(22)   | 0.3(4)    |
| C(20)-C(21)-P(2)-C(22)  | -178.8(4) |
| N(1)-C(22)-P(2)-C(21)   | -0.7(3)   |
| C(23)-C(22)-P(2)-C(21)  | -179.9(4) |

---

Symmetry transformations used to generate equivalent atoms:

#1 -x, -y+1, -z+2

#### 4. Theoretically computed data of **4**, **5**, and **6**

Cartesian Coordinates of the Optimized Geometries of Compound **4**, **5**, and **6** by theB3LYP method in combination of 6-31G(d) basis set for C, N, P and H atoms, and Lanl2dz basis set and pseudopotential for Bi atoms. All calculations were performed using Gaussian 09 package.<sup>[3]</sup>

##### Compound **4**:

|    |             |             |             |
|----|-------------|-------------|-------------|
| Bi | -0.00043600 | 0.00010300  | -1.39825500 |
| Bi | -0.00025700 | -0.00014300 | 1.39551900  |
| P  | -3.31974100 | -3.56650100 | 0.00122100  |
| P  | 3.56656700  | -3.31900400 | 0.00266900  |
| P  | -3.56624900 | 3.31997000  | 0.00078600  |
| P  | 3.32016200  | 3.56537300  | 0.00291400  |
| N  | -1.78721800 | -1.56461100 | -0.64324200 |
| N  | -1.42954500 | -1.89646000 | 0.64087800  |
| N  | 1.89585800  | -1.42920300 | 0.64167900  |
| N  | 1.56463100  | -1.78686400 | -0.64260300 |
| N  | -1.56437200 | 1.78731100  | -0.64330700 |
| N  | -1.89669600 | 1.42941000  | 0.64062200  |
| N  | 1.42917000  | 1.89584500  | 0.64133700  |
| N  | 1.78741900  | 1.56396600  | -0.64262900 |
| C  | -2.77754000 | -2.32306600 | -1.13366200 |
| C  | -2.11578900 | -2.93691700 | 1.13369200  |
| C  | -1.78024400 | -3.55844900 | 2.49327800  |
| C  | -1.75383400 | -2.51238900 | 3.62756500  |
| C  | -2.83222900 | -4.62431100 | 2.86625200  |
| C  | -0.39945600 | -4.24867300 | 2.38372700  |
| C  | -3.42259300 | -2.03449500 | -2.49306300 |
| C  | -4.41652600 | -3.15658000 | -2.86034400 |
| C  | -2.38237500 | -1.94246100 | -3.62923800 |
| C  | -4.20332200 | -0.70255600 | -2.38703700 |
| C  | 2.93645300  | -2.11505600 | 1.13483700  |
| C  | 2.32345700  | -2.77701500 | -1.13269100 |
| C  | 2.03551600  | -3.42207500 | -2.49221900 |
| C  | 3.15742400  | -4.41650100 | -2.85870100 |
| C  | 1.94473000  | -2.38182100 | -3.62845900 |
| C  | 0.70317100  | -4.20222100 | -2.38706200 |
| C  | 3.55811100  | -1.77901500 | 2.49424700  |
| C  | 4.62199000  | -2.83247300 | 2.86877700  |

|   |              |              |              |
|---|--------------|--------------|--------------|
| C | 4. 25088100  | -0. 39961800 | 2. 38302900  |
| C | 2. 51197300  | -1. 74916300 | 3. 62834200  |
| C | -2. 32240000 | 2. 77797100  | -1. 13373800 |
| C | -2. 93734700 | 2. 11553700  | 1. 13315000  |
| C | -3. 55985500 | 1. 77922900  | 2. 49211300  |
| C | -4. 25021500 | 0. 39861900  | 2. 38111900  |
| C | -2. 51466100 | 1. 75180400  | 3. 62716000  |
| C | -4. 62581100 | 2. 83114200  | 2. 86502100  |
| C | -2. 03320000 | 3. 42335100  | -2. 49285900 |
| C | -3. 15480500 | 4. 41784400  | -2. 86008900 |
| C | -1. 94129900 | 2. 38348000  | -3. 62936800 |
| C | -0. 70099300 | 4. 20355100  | -2. 38628200 |
| C | 2. 11519000  | 2. 93630100  | 1. 13452900  |
| C | 2. 77839800  | 2. 32198600  | -1. 13231600 |
| C | 3. 42505100  | 2. 03299300  | -2. 49087700 |
| C | 4. 41523000  | 3. 15787500  | -2. 85982300 |
| C | 4. 21039900  | 0. 70397500  | -2. 38154900 |
| C | 2. 38610000  | 1. 93466400  | -3. 62761300 |
| C | 1. 77829600  | 3. 55862800  | 2. 49343900  |
| C | 2. 83009900  | 4. 62448500  | 2. 86696400  |
| C | 1. 75034600  | 2. 51333000  | 3. 62838100  |
| C | 0. 39779700  | 4. 24911400  | 2. 38191300  |
| H | -0. 96559000 | -1. 76557800 | 3. 49032000  |
| H | -1. 55938900 | -3. 00837400 | 4. 58585900  |
| H | -2. 71117600 | -1. 98686500 | 3. 70694500  |
| H | -2. 57118500 | -5. 08006100 | 3. 82855100  |
| H | -2. 87977300 | -5. 42471700 | 2. 12042200  |
| H | -3. 83280200 | -4. 18765800 | 2. 95862000  |
| H | 0. 38133900  | -3. 54052000 | 2. 09201800  |
| H | -0. 42299100 | -5. 04391700 | 1. 63078600  |
| H | -0. 12030600 | -4. 69810000 | 3. 34519200  |
| H | -3. 91434800 | -4. 12618800 | -2. 95012300 |
| H | -4. 89032200 | -2. 92988100 | -3. 82265200 |
| H | -5. 21075300 | -3. 25483700 | -2. 11285600 |
| H | -1. 68858500 | -1. 10679800 | -3. 49465500 |
| H | -2. 89143100 | -1. 78328800 | -4. 58716700 |
| H | -1. 79546000 | -2. 86353100 | -3. 70702300 |
| H | -4. 99323900 | -0. 77578700 | -1. 63168300 |
| H | -4. 67301400 | -0. 45820200 | -3. 34829900 |
| H | -3. 54818600 | 0. 12501700  | -2. 10064200 |
| H | 4. 12728400  | -3. 91472400 | -2. 94800700 |
| H | 2. 93108900  | -4. 89036100 | -3. 82106300 |
| H | 3. 25494200  | -5. 21064700 | -2. 11102800 |
| H | 1. 10913300  | -1. 68782100 | -3. 49456300 |

|   |              |              |              |
|---|--------------|--------------|--------------|
| H | 1. 78625600  | -2. 89079000 | -4. 58655000 |
| H | 2. 86603200  | -1. 79515100 | -3. 70541200 |
| H | 0. 77560400  | -4. 99224000 | -1. 63173600 |
| H | 0. 45917200  | -4. 67171700 | -3. 34851100 |
| H | -0. 12427400 | -3. 54674100 | -2. 10108000 |
| H | 4. 18348400  | -3. 83213000 | 2. 96226600  |
| H | 5. 07798800  | -2. 57105900 | 3. 83085900  |
| H | 5. 42250100  | -2. 88240800 | 2. 12322100  |
| H | 5. 04632500  | -0. 42563200 | 1. 63038300  |
| H | 4. 70048200  | -0. 11993800 | 3. 34426000  |
| H | 3. 54419900  | 0. 38202100  | 2. 09000300  |
| H | 1. 76689700  | -0. 95945400 | 3. 49015500  |
| H | 3. 00826900  | -1. 55466300 | 4. 58645800  |
| H | 1. 98442900  | -2. 70530000 | 3. 70878700  |
| H | -5. 04482000 | 0. 42276200  | 1. 62752100  |
| H | -4. 70049500 | 0. 11893600  | 3. 34202900  |
| H | -3. 54192300 | -0. 38210400 | 2. 08952900  |
| H | -3. 01141300 | 1. 55675500  | 4. 58493200  |
| H | -1. 98900900 | 2. 70898000  | 3. 70764000  |
| H | -1. 76792600 | 0. 96349600  | 3. 48989800  |
| H | -5. 42565300 | 2. 87933400  | 2. 11862800  |
| H | -4. 18904800 | 3. 83157500  | 2. 95839300  |
| H | -5. 08232600 | 2. 56952500  | 3. 82680200  |
| H | -4. 12458400 | 3. 91607500  | -2. 95028900 |
| H | -2. 92767000 | 4. 89188300  | -3. 82217500 |
| H | -3. 25294100 | 5. 21184800  | -2. 11234800 |
| H | -1. 10593800 | 1. 68931800  | -3. 49483100 |
| H | -1. 78170300 | 2. 89280100  | -4. 58708800 |
| H | -2. 86257900 | 1. 79695400  | -3. 70757600 |
| H | -0. 77412800 | 4. 99332900  | -1. 63077300 |
| H | -0. 45619800 | 4. 67337200  | -3. 34737000 |
| H | 0. 12626500  | 3. 54805700  | -2. 09978600 |
| H | 3. 90958700  | 4. 12545300  | -2. 95201000 |
| H | 4. 89058700  | 2. 93082600  | -3. 82128000 |
| H | 5. 20856200  | 3. 26063300  | -2. 11199200 |
| H | 4. 68161000  | 0. 45929700  | -3. 34199300 |
| H | 3. 55784200  | -0. 12525600 | -2. 09397100 |
| H | 4. 99954600  | 0. 78148400  | -1. 62581700 |
| H | 1. 79495800  | 2. 85287800  | -3. 70716100 |
| H | 1. 69629000  | 1. 09582500  | -3. 49249700 |
| H | 2. 89663800  | 1. 77657000  | -4. 58492700 |
| H | 3. 83046900  | 4. 18766400  | 2. 96072500  |
| H | 2. 56807000  | 5. 08086100  | 3. 82869800  |
| H | 2. 87866700  | 5. 42443700  | 2. 12071500  |

|   |             |            |            |
|---|-------------|------------|------------|
| H | 2.70749300  | 1.98769800 | 3.70927700 |
| H | 0.96211600  | 1.76658300 | 3.49071800 |
| H | 1.55483900  | 3.01000000 | 4.58610100 |
| H | 0.11761800  | 4.69910700 | 3.34281300 |
| H | -0.38281300 | 3.54097900 | 2.08966400 |
| H | 0.42240600  | 5.04395200 | 1.62857900 |

**Compound 5:**

|    |              |              |              |
|----|--------------|--------------|--------------|
| Bi | -0.000283000 | -0.000200000 | -1.430550000 |
| Bi | 0.000306000  | 0.000189000  | 1.430400000  |
| P  | -3.305306000 | 3.550147000  | 0.000386000  |
| P  | -3.550241000 | -3.305179000 | 0.001432000  |
| P  | 3.550119000  | 3.305348000  | -0.001417000 |
| P  | 3.305328000  | -3.550107000 | -0.000410000 |
| N  | -1.554953000 | 1.744040000  | -0.680229000 |
| N  | -1.629802000 | 1.674144000  | 0.680219000  |
| N  | -1.673661000 | -1.630083000 | 0.680688000  |
| N  | -1.744465000 | -1.554681000 | -0.679694000 |
| N  | 1.744015000  | 1.554612000  | -0.681008000 |
| N  | 1.674199000  | 1.630142000  | 0.679409000  |
| N  | 1.630493000  | -1.673650000 | 0.679842000  |
| N  | 1.554301000  | -1.744467000 | -0.680497000 |
| C  | -2.357305000 | 2.670297000  | -1.210460000 |
| C  | -2.495485000 | 2.541242000  | 1.210762000  |
| C  | -2.720407000 | 2.547384000  | 2.708273000  |
| C  | -2.606492000 | 3.961575000  | 3.304004000  |
| C  | -4.075973000 | 1.905398000  | 3.066347000  |
| C  | -2.346668000 | 2.896278000  | -2.707860000 |
| C  | -3.765430000 | 2.891457000  | -3.303464000 |
| C  | -1.603043000 | 4.199190000  | -3.064655000 |
| C  | -2.540513000 | -2.495874000 | 1.211461000  |
| C  | -2.671189000 | -2.356705000 | -1.209622000 |
| C  | -2.898205000 | -2.345465000 | -2.706866000 |
| C  | -2.893116000 | -3.763955000 | -3.303128000 |
| C  | -4.201705000 | -1.602291000 | -3.062457000 |
| C  | -2.545667000 | -2.721417000 | 2.708881000  |
| C  | -3.959417000 | -2.607426000 | 3.305658000  |
| C  | -1.903750000 | -4.077278000 | 3.065932000  |
| C  | 2.670384000  | 2.356542000  | -1.211703000 |
| C  | 2.541385000  | 2.496031000  | 1.209448000  |
| C  | 2.547514000  | 2.721819000  | 2.706828000  |
| C  | 1.905309000  | 4.077490000  | 3.064104000  |
| C  | 3.961725000  | 2.608482000  | 3.302624000  |

|   |               |               |               |
|---|---------------|---------------|---------------|
| C | 2. 896373000  | 2. 345069000  | -2. 709097000 |
| C | 2. 891101000  | 3. 763485000  | -3. 305527000 |
| C | 4. 199520000  | 1. 601652000  | -3. 065485000 |
| C | 2. 496631000  | -2. 540462000 | 1. 210104000  |
| C | 2. 356062000  | -2. 671152000 | -1. 210900000 |
| C | 2. 343953000  | -2. 898172000 | -2. 708133000 |
| C | 3. 762092000  | -2. 892994000 | -3. 305224000 |
| C | 1. 600653000  | -4. 201718000 | -3. 063292000 |
| C | 2. 723066000  | -2. 545613000 | 2. 707394000  |
| C | 2. 609205000  | -3. 959333000 | 3. 304259000  |
| C | 4. 079236000  | -1. 903893000 | 3. 063651000  |
| H | -2. 736000000 | 3. 930476000  | 4. 392189000  |
| H | -3. 377148000 | 4. 623099000  | 2. 891848000  |
| H | -1. 630835000 | 4. 409211000  | 3. 086432000  |
| H | -4. 153711000 | 0. 891737000  | 2. 658464000  |
| H | -4. 903953000 | 2. 495019000  | 2. 656991000  |
| H | -4. 200916000 | 1. 851075000  | 4. 154439000  |
| H | -4. 286340000 | 1. 952645000  | -3. 086948000 |
| H | -3. 724702000 | 3. 019496000  | -4. 391472000 |
| H | -4. 365933000 | 3. 710025000  | -2. 890247000 |
| H | -2. 127696000 | 5. 069348000  | -2. 654396000 |
| H | -1. 539333000 | 4. 320694000  | -4. 152656000 |
| H | -0. 586415000 | 4. 198775000  | -2. 656730000 |
| H | -1. 953906000 | -4. 284516000 | -3. 087510000 |
| H | -3. 021931000 | -3. 722782000 | -4. 391029000 |
| H | -3. 711108000 | -4. 365038000 | -2. 889615000 |
| H | -5. 071350000 | -2. 127562000 | -2. 651902000 |
| H | -4. 323940000 | -1. 538102000 | -4. 150347000 |
| H | -4. 201508000 | -0. 585863000 | -2. 654030000 |
| H | -4. 406962000 | -1. 631555000 | 3. 088863000  |
| H | -3. 927590000 | -2. 737454000 | 4. 393760000  |
| H | -4. 621419000 | -3. 377722000 | 2. 893601000  |
| H | -2. 493917000 | -4. 904960000 | 2. 656759000  |
| H | -1. 848572000 | -4. 202627000 | 4. 153935000  |
| H | -0. 890446000 | -4. 155119000 | 2. 657191000  |
| H | 2. 494838000  | 4. 905329000  | 2. 654327000  |
| H | 1. 850887000  | 4. 203033000  | 4. 152122000  |
| H | 0. 891664000  | 4. 154847000  | 2. 656107000  |
| H | 4. 623133000  | 3. 378982000  | 2. 889992000  |
| H | 4. 409504000  | 1. 632757000  | 3. 085657000  |
| H | 3. 930611000  | 2. 738661000  | 4. 390729000  |
| H | 1. 952133000  | 4. 284229000  | -3. 089303000 |
| H | 3. 019141000  | 3. 722157000  | -4. 393513000 |
| H | 3. 709486000  | 4. 364484000  | -2. 892668000 |

|   |               |               |               |
|---|---------------|---------------|---------------|
| H | 5. 069515000  | 2. 126821000  | -2. 655544000 |
| H | 4. 321029000  | 1. 537356000  | -4. 153451000 |
| H | 4. 199443000  | 0. 585260000  | -2. 656975000 |
| H | 4. 282718000  | -1. 953749000 | -3. 089917000 |
| H | 3. 720288000  | -3. 021821000 | -4. 393099000 |
| H | 4. 363469000  | -3. 710944000 | -2. 892055000 |
| H | 1. 535843000  | -4. 323953000 | -4. 151146000 |
| H | 0. 584464000  | -4. 201581000 | -2. 654278000 |
| H | 2. 126213000  | -5. 071334000 | -2. 653045000 |
| H | 1. 633128000  | -4. 406714000 | 3. 088074000  |
| H | 2. 739910000  | -3. 927509000 | 4. 392281000  |
| H | 3. 379135000  | -4. 621469000 | 2. 891735000  |
| H | 4. 205227000  | -1. 848703000 | 4. 151579000  |
| H | 4. 156989000  | -0. 890608000 | 2. 654839000  |
| H | 4. 906596000  | -2. 494192000 | 2. 654016000  |
| H | -1. 925101000 | -1. 930044000 | 3. 156117000  |
| H | -1. 928699000 | 1. 927324000  | 3. 155618000  |
| H | 1. 927571000  | 1. 930277000  | 3. 154624000  |
| H | 1. 932053000  | -1. 924911000 | 3. 155073000  |
| H | -2. 062515000 | -1. 787094000 | -3. 155479000 |
| H | 1. 785266000  | -2. 062520000 | -3. 156427000 |
| H | 2. 060287000  | 1. 786784000  | -3. 157085000 |
| H | -1. 788896000 | 2. 060023000  | -3. 156170000 |

**Compound 6:**

|    |               |              |               |
|----|---------------|--------------|---------------|
| Bi | -1. 434350000 | 0. 000903000 | -0. 001179000 |
| C  | -3. 472658000 | 3. 076677000 | 0. 751111000  |
| C  | -4. 860149000 | 3. 218510000 | 0. 742168000  |
| C  | -5. 478792000 | 4. 009950000 | -0. 228621000 |
| C  | -4. 699606000 | 4. 663552000 | -1. 187269000 |
| C  | -3. 312448000 | 4. 518393000 | -1. 184369000 |
| C  | -2. 679526000 | 3. 715326000 | -0. 219767000 |
| C  | -1. 211993000 | 3. 552781000 | -0. 222301000 |
| C  | 1. 212109000  | 3. 551766000 | -0. 219078000 |
| C  | 2. 679723000  | 3. 713670000 | -0. 212159000 |
| C  | 3. 469937000  | 3. 074172000 | 0. 760615000  |
| C  | 4. 857397000  | 3. 216259000 | 0. 756312000  |
| C  | 5. 479029000  | 4. 008758000 | -0. 211706000 |
| C  | 4. 702814000  | 4. 662946000 | -1. 172323000 |
| C  | 3. 315675000  | 4. 517607000 | -1. 173998000 |
| N  | -0. 679172000 | 2. 346226000 | 0. 022022000  |
| N  | 0. 677438000  | 2. 345610000 | 0. 023674000  |
| P  | 0. 001004000  | 4. 820001000 | -0. 470176000 |
| H  | -2. 997154000 | 2. 498063000 | 1. 537262000  |



|    |              |              |              |
|----|--------------|--------------|--------------|
| H  | -5.451624000 | 2.717846000  | 1.503695000  |
| H  | -6.559301000 | 4.125885000  | -0.232160000 |
| H  | -5.172500000 | 5.285623000  | -1.942477000 |
| H  | -2.711274000 | 5.015161000  | -1.940624000 |
| H  | 2.992077000  | 2.494758000  | 1.544753000  |
| H  | 5.446549000  | 2.715140000  | 1.519337000  |
| H  | 6.559530000  | 4.124925000  | -0.211581000 |
| H  | 5.178013000  | 5.285640000  | -1.925546000 |
| H  | 2.716943000  | 5.014734000  | -1.931971000 |
| C  | 3.314694000  | 1.178821000  | 4.514324000  |
| C  | 4.701854000  | 1.180366000  | 4.659201000  |
| C  | 5.480094000  | 0.221376000  | 4.004973000  |
| C  | 4.860456000  | -0.748316000 | 3.213001000  |
| C  | 3.472935000  | -0.755845000 | 3.071316000  |
| C  | 2.680726000  | 0.215226000  | 3.710862000  |
| C  | 1.213159000  | 0.218948000  | 3.549042000  |
| C  | -1.210908000 | 0.220110000  | 3.549867000  |
| C  | -2.678360000 | 0.216856000  | 3.712966000  |
| C  | -3.311512000 | 1.180540000  | 4.516949000  |
| C  | -4.698534000 | 1.182234000  | 4.663108000  |
| C  | -5.477472000 | 0.223229000  | 4.009732000  |
| C  | -4.858628000 | -0.746663000 | 3.217358000  |
| C  | -3.471244000 | -0.754354000 | 3.074448000  |
| N  | -0.677810000 | -0.022699000 | 2.343170000  |
| N  | 0.678823000  | -0.024404000 | 2.342821000  |
| P  | 0.001692000  | 0.467442000  | 4.817487000  |
| H  | 2.714312000  | 1.935431000  | 5.011539000  |
| H  | 5.175549000  | 1.934752000  | 5.281640000  |
| H  | 6.560641000  | 0.223955000  | 4.120718000  |
| H  | 5.451112000  | -1.510030000 | 2.711687000  |
| H  | 2.996691000  | -1.541130000 | 2.492155000  |
| H  | -2.710637000 | 1.937188000  | 5.013495000  |
| H  | -5.171552000 | 1.936780000  | 5.285869000  |
| H  | -6.557901000 | 0.225898000  | 4.126449000  |
| H  | -5.449822000 | -1.508636000 | 2.717033000  |
| H  | -2.995600000 | -1.540020000 | 2.495262000  |
| Bi | 1.434212000  | 0.001238000  | -0.000973000 |
| C  | 3.470943000  | -3.075272000 | -0.756676000 |
| C  | 4.858224000  | -3.219202000 | -0.752183000 |
| C  | 5.478628000  | -4.012864000 | 0.215650000  |
| C  | 4.701301000  | -4.666356000 | 1.175906000  |
| C  | 3.314409000  | -4.519033000 | 1.177454000  |
| C  | 2.679619000  | -3.713918000 | 0.215747000  |
| C  | 1.212360000  | -3.550153000 | 0.222225000  |

|   |               |               |               |
|---|---------------|---------------|---------------|
| C | -1. 211732000 | -3. 549185000 | 0. 224647000  |
| C | -2. 679298000 | -3. 711452000 | 0. 221951000  |
| C | -3. 472272000 | -3. 073790000 | -0. 749799000 |
| C | -4. 859647000 | -3. 216450000 | -0. 741681000 |
| C | -5. 478480000 | -4. 007681000 | 0. 229183000  |
| C | -4. 699515000 | -4. 660082000 | 1. 188781000  |
| C | -3. 312461000 | -4. 514171000 | 1. 186640000  |
| N | 0. 678813000  | -2. 343944000 | -0. 022667000 |
| N | -0. 677745000 | -2. 343521000 | -0. 021555000 |
| P | 0. 000010000  | -4. 816897000 | 0. 475421000  |
| H | 2. 994041000  | -2. 495335000 | -1. 540966000 |
| H | 5. 448075000  | -2. 718498000 | -1. 514949000 |
| H | 6. 558949000  | -4. 130578000 | 0. 215708000  |
| H | 5. 175503000  | -5. 290126000 | 1. 928896000  |
| H | 2. 714923000  | -5. 015503000 | 1. 935252000  |
| H | -2. 996599000 | -2. 495709000 | -1. 536266000 |
| H | -5. 450970000 | -2. 716877000 | -1. 504044000 |
| H | -6. 558914000 | -4. 124416000 | 0. 231885000  |
| H | -5. 172497000 | -5. 281725000 | 1. 944260000  |
| H | -2. 711588000 | -5. 009733000 | 1. 943955000  |
| C | -3. 315580000 | -1. 186335000 | -4. 512452000 |
| C | -4. 702904000 | -1. 188480000 | -4. 655804000 |
| C | -5. 480627000 | -0. 227981000 | -4. 003178000 |
| C | -4. 860305000 | 0. 743893000  | -3. 214388000 |
| C | -3. 472632000 | 0. 752030000  | -3. 074283000 |
| C | -2. 680960000 | -0. 220675000 | -3. 712088000 |
| C | -1. 213237000 | -0. 223535000 | -3. 551191000 |
| C | 1. 210765000  | -0. 222063000 | -3. 552375000 |
| C | 2. 678248000  | -0. 217126000 | -3. 715254000 |
| C | 3. 312901000  | -1. 180357000 | -4. 518550000 |
| C | 4. 699984000  | -1. 180262000 | -4. 664316000 |
| C | 5. 477432000  | -0. 219924000 | -4. 011128000 |
| C | 4. 857097000  | 0. 749464000  | -3. 219281000 |
| C | 3. 469685000  | 0. 755378000  | -3. 076837000 |
| N | 0. 677625000  | 0. 021156000  | -2. 345729000 |
| N | -0. 678940000 | 0. 020129000  | -2. 344981000 |
| P | -0. 001769000 | -0. 471215000 | -4. 819659000 |
| H | -2. 715536000 | -1. 943972000 | -5. 008513000 |
| H | -5. 177131000 | -1. 944507000 | -5. 275842000 |
| H | -6. 561297000 | -0. 231085000 | -4. 117761000 |
| H | -5. 450557000 | 1. 506821000  | -2. 714403000 |
| H | -2. 995791000 | 1. 538904000  | -2. 497683000 |
| H | 2. 713170000  | -1. 938090000 | -5. 014824000 |
| H | 5. 174193000  | -1. 934446000 | -5. 286615000 |

|   |             |              |              |
|---|-------------|--------------|--------------|
| H | 6.557911000 | -0.221248000 | -4.127414000 |
| H | 5.447193000 | 1.512269000  | -2.718950000 |
| H | 2.992740000 | 1.540518000  | -2.497943000 |

Comparison of selected bond distances (Å), bond angles (°) and torsion angles (°) of **4**

|                           | Experimental<br>value | Calculated<br>value |                           | Experimental<br>value | Calculated<br>value |
|---------------------------|-----------------------|---------------------|---------------------------|-----------------------|---------------------|
| Bi (1)-Bi (2)             | 2.7964 (4)            | 2.79377             | Bi (1)-Bi (2)-N (2)-N (1) | -26.2 (4)             | -21.410             |
| Bi (1)-N (1)              | 2.472 (7)             | 2.49260             | Bi (1)-Bi (2)-N (3)-N (4) | -22.8 (4)             | -21.367             |
| Bi (1)-N (4)              | 2.483 (6)             | 2.49273             | Bi (1)-Bi (2)-N (6)-N (5) | -24.3 (4)             | -21.382             |
| Bi (1)-N (5)              | 2.480 (6)             | 2.49218             | Bi (1)-Bi (2)-N (7)-N (8) | -27.1 (4)             | -21.410             |
| Bi (1)-N (8)              | 2.500 (6)             | 2.49198             | Bi-Bi-N <sub>(avg)</sub>  | -25.0 (7)             | -21.397             |
| Bi (2)-N (2)              | 2.499 (7)             | 2.49135             | N (1)-N (2)               | 1.374 (8)             | 1.37368             |
| Bi (2)-N (3)              | 2.454 (6)             | 2.49198             | N (3)-N (4)               | 1.368 (8)             | 1.37369             |
| Bi (2)-N (6)              | 2.475 (5)             | 2.49166             | N (5)-N (6)               | 1.352 (8)             | 1.37369             |
| Bi (2)-N (7)              | 2.492 (7)             | 2.49113             | N (7)-N (8)               | 1.377 (8)             | 1.37370             |
| Bi-N <sub>(avg)</sub>     | 2.481 (8)             | 2.492               | N-N <sub>(avg)</sub>      | 1.367 (8)             | 1.37369             |
| N (1)-Bi (1)-N (5)        | 83.4 (2)              | 84.741              | P (1)-C (2)               | 1.746 (8)             | 1.76874             |
| N (1)-Bi (1)-N (4)        | 85.2 (2)              | 84.742              | P (1)-C (1)               | 1.753 (8)             | 1.76863             |
| N (4)-Bi (1)-N (8)        | 82.3 (2)              | 84.694              | P (2)-C (12)              | 1.748 (7)             | 1.76872             |
| N (5)-Bi (1)-N (8)        | 86.5 (2)              | 84.753              | P (2)-C (11)              | 1.753 (8)             | 1.76864             |
| N (6)-Bi (2)-N (2)        | 84.5 (2)              | 84.743              | P (3)-C (21)              | 1.743 (8)             | 1.76871             |
| N (3)-Bi (2)-N (2)        | 83.8 (2)              | 84.739              | P (3)-C (22)              | 1.756 (7)             | 1.76865             |
| N (3)-Bi (2)-N (7)        | 84.6 (2)              | 84.734              | P (4)-C (32)              | 1.743 (8)             | 1.76868             |
| N (6)-Bi (2)-N (7)        | 84.8 (2)              | 84.736              | P (4)-C (31)              | 1.765 (8)             | 1.76869             |
| N-Bi-N <sub>(avg)</sub>   | 84.3 (8)              | 84.735              | P-C <sub>(avg)</sub>      | 1.750 (8)             | 1.76868             |
| Bi (2)-Bi (1)-N (8)-N (7) | -26.8 (4)             | -21.423             | C (2)-P (1)-C (1)         | 87.2 (4)              | 87.245              |
| Bi (2)-Bi (1)-N (1)-N (2) | -26.7 (4)             | -21.414             | C (12)-P (2)-C (11)       | 87.3 (4)              | 87.244              |
| Bi (2)-Bi (1)-N (4)-N (3) | -22.7 (4)             | -21.379             | C (21)-P (3)-C (22)       | 87.0 (4)              | 87.245              |
| Bi (2)-Bi (1)-N (5)-N (6) | -24.0 (4)             | -21.388             | C (32)-P (4)-C (31)       | 86.7 (4)              | 87.244              |

## 5. References

- [1] J.-W. Wang, L.-Y. Ding, B.-Q. Wang, Y.-Y. He, Y. Guo, X.-F. Jia, W. Zheng, *J. Mol. Struct.* **2014**, *1058*, 62–70;
- [2] W. Zheng, G.-Z. Zhang, K.-N. Fan, *Organometallics* **2006**, *25*, 1548–1550;
- [3] M. J. Frisch, et. al, Gaussian 09, Revision C.01, Gaussian, Inc., Wallingford CT, 2010.
